# Supplementary material for: Pd nanoparticle catalysed one-pot sequential Heck and Suzuki couplings of bromo-chloroarenes in ionic liquids and water
Source: Royal Society of Chemistry journal article supplement (doi:10.1039/c1ob06385e), 2011-10-20

## **Pd-nanoparticles catalyzed one-pot sequential Heck and Suzuki couplings of bromo-chloroarenes in ionic liquids and water**

**Pietro Cotugno,<sup>a</sup> Antonio Monopoli,<sup>a</sup> Francesco Ciminale,<sup>a</sup> Nicola Cioffi,<sup>a</sup> Angelo Nacci,<sup>\*a,b</sup>**

<sup>a</sup> *Department of Chemistry, Università degli Studi di Bari Aldo Moro, Via Orabona 4, 70126 - Bari,*

<sup>b</sup> *CNR – ICCOM, Department of Chemistry, Università degli Studi di Bari - Aldo Moro, Via Orabona 4, 70126 -Bari, Italy* E-mail: nacci@chimica.uniba.it

Phone: (+)39-080-5442499

Fax: (+)39-080-5442129

### **Electronic Supplementary Information**

#### **Table of Contents**

|                                                                               |     |
|-------------------------------------------------------------------------------|-----|
| General remarks .....                                                         | E2  |
| Representative procedure for sequential one-pot double Heck couplings.....    | E2  |
| Representative procedure for sequential one-pot Heck/Suzuki couplings.....    | E2  |
| Representative procedure for sequential one-pot double Suzuki couplings ..... | E3  |
| Spectral data and characterisation of the coupling products.....              | E3  |
| <sup>1</sup> H and <sup>13</sup> C NMR spectra images.....                    | E10 |
| Glc chromatograms of the reaction products .....                              | E64 |

**General Remarks:** All chemicals used for synthetic procedures such as aryl halides, reductants and tetraalkylammonium salts, were commercially available and were used without further purification. Reactions were monitored by GLC and GC-MS techniques by using an Agilent 5890 A gaschromatograph and an Agilent 6850/MSD 5975C instrument, respectively. Both the instruments were equipped with a capillary column HP-5MS (Agilent, 1. 30 m, i.d. 0.25 mm, s.p.t. 0.25  $\mu$ ). NMR spectra were recorded on a Varian Inova 400 MHz spectrometer. Identification of compounds of tables 1-4 was made by comparison of their spectral data with those reported in the literature (most of them are identified with the help of the NIST library). For unknown compounds the complete characterization was provided.

**Representative procedure for sequential one-pot double Heck couplings.** In a 10 ml vial, equipped with a screw cap and a magnetic bar, tetrabutylammonium bromide (TBAB, 1 g), tetrabutylammonium acetate (TBAA, 0.45 g, 1.5 mmol), Pd(OAc)<sub>2</sub>, (1.7 mg, 0.0075 mmol, 1.5 mol%), olefin 1 (0.5 mmol), and bromochlorobenzene (0.5 mmol) were placed. The solution was heated to 100 °C under air until the disappearance of the first olefin monitored by GC-MS. Olefin 2 (0.5 mmol) was then added and the reaction mixture was heated to 120 °C for the proper reaction time (see tables 1). Monitoring of the reaction mixture by glc and GC-MS provided reagents conversion. After completion of the reaction, mixture was added to 20 mL of water and extracted with dichloromethane (3  $\times$  20 mL). The combined organic layers were washed with water (2  $\times$  20 mL), dried with anhydrous MgSO<sub>4</sub> and concentrated in vacuo. The residue was purified by chromatography on silica gel to give the desired product. Unknown compounds were identified by NMR analysis (see below).

**Representative procedure for sequential one-pot Heck/Suzuki couplings.** In a 10 ml vial, equipped with a screw cap and a magnetic bar, TBAB (1 g), 4-bromochlorobenzene (0.5 mmol), olefin (0.5 mmol), TBAA (0.75 mmol), and Pd(OAc)<sub>2</sub>, (1.7 mg, 0.0075 mmol, 1.5 mol%) were placed. The mixture was heated to 100°C and stirred under air. The reaction was monitored by GC-MS until the completion of the Heck coupling. Then, boronic acid (0.75 mmol) and Cs<sub>2</sub>CO<sub>3</sub> (1 mmol) and 150  $\mu$ l of H<sub>2</sub>O were added and the temperature was raised to 120°C. Monitoring of the reaction mixture by glc and GC-MS provided reagents conversion (see table 3). After completion of the reaction, both yields and products identification were carried out after extraction of the mixture followed by column chromatography as reported in the previous procedure.

**Representative procedure for sequential one-pot double Suzuki couplings.** In a 10 ml vial, equipped with a screw cap and a magnetic bar, a solution of TBAOH 1.5 M (1 ml, 1.5 mmol), bromochloroarene (0.5 mmol), Pd acetate (1 mol%), boronic acid ( $R^1$ , 0.6 mmol) were placed. The reaction mixture was heated to 60°C and stirred under air until the completion of the first step. Then, a boronic acid ( $R^2$ , 0.6 mmol) was added and the reaction temperature was raised to 100 °C for the proper time (see table 4). Monitoring of the reaction mixture by glc and GC-MS provided reagents conversion. After completion of the reaction, both yields and products identification were carried out after extraction of the mixture followed by column chromatography as reported in the previous procedure.

### Spectral data and characterisation of the coupling products.

#### *(E)-butyl 3-(4-((E)-3-methoxy-3-oxoprop-1-en-1-yl)phenyl)acrylate*

(1). Lit.<sup>1</sup> <sup>1</sup>H NMR (CDCl<sub>3</sub>, 400 MHz) δ ppm: 0.94 (t,  $J$ = 7.3 Hz, 3H),

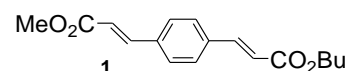

1.35-1.47 (m, 2H), 1.60-1.72 (m, 2H), 3.79 (s, 3H), 4.19 (t,  $J$ = 6.8 Hz, 2H), 6.44 (two doublets almost overlapped,  $J$ = 15.9 Hz, 2H), 7.51 (b s, 4H), 7.63 and 7.65 (two doublets overlapped,  $J$ = 15.9 and 16.1 Hz, 2H). <sup>13</sup>C NMR δ ppm: 13.90, 19.38, 30.96, 51.97, 64.76, 119.07, 119.66, 128.69, 136.26, 136.47, 143.53, 143.89, 166.99, 167.35. EI m/z: 288 ( $M^+$ , 28), 257 (16), 232 (100), 215 (52), 201 (39), 183 (34), 155 (22), 127 (44), 102 (10), 92 (7), 78 (9).

#### *(E)-ethyl 3-(4-((E)-3-butoxy-3-oxoprop-1-en-1-yl)phenyl)but-2-enoate*

(2). <sup>1</sup>H NMR (CDCl<sub>3</sub>, 400 MHz) δ ppm: 0.94 (t,  $J$ = 7.3 3H),

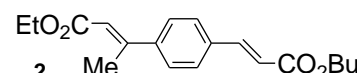

1.29 (t,  $J$ = 7.1 3H), 1.35-1.49 (m, 2H), 1.61-1.72 (m, 2H), 2.54 (d,  $J$ = 1.3 Hz, 3H), 4.19 (m, 4H), 6.14 (q,  $J$ = 1.3 Hz, 1H), 6.45 (d,  $J$ = 15.9, 1H), 7.42-7.54 (m, 4H), 7.64 (d,  $J$ = 15.9, 1H). <sup>13</sup>C NMR δ ppm: 13.83, 13.99, 15.06, 19.38, 30.95, 60.37, 64.75, 118.29, 119.30, 128.18, 128.25, 135.60, 138.71, 142.58, 143.71, 155.55, 166.12, 167.09. EI m/z: 316 ( $M^+$ , 25), 271 (31), 243 (36), 214 (100), 197 (41), 186 (25), 141 (50), 115 (62), 102 (7). C<sub>19</sub>H<sub>24</sub>O<sub>4</sub> (316,17): calcd. C, 72.13; H, 7.65; O, 20.23, found C, 72.31; H, 7.68; O, 20.01.

*(E)-butyl 3-(4-((E)-styryl)phenyl)acrylate* (3). Lit.<sup>2</sup> <sup>1</sup>H NMR (CDCl<sub>3</sub>, 400 MHz) δ ppm: 0.95 (t,  $J$ = 7.3 Hz, 3H), 1.40-1.49 (m, 2H), 1.62-

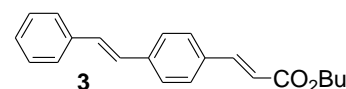

1.70 (m, 2H), 4.19 (t,  $J$ = 6.6 Hz, 2H), 6.42 (d,  $J$ = 15.9 Hz, 1H), 7.07 (d,  $J$ = 16.3 Hz, 1H), 7.15 (d,

<sup>1</sup> C. Burmester, S. Mataka, T. Thiemann *Synth. Commun.* 2010, **40**, 3196.

<sup>2</sup> X. Zhang, A. Liu, W. Chen, *Org. Lett.*, 2008, **10**, 3849.

$J = 16.3$  Hz, 1H), 7.22-7.39 (m, 3H), 7.50 (b s, 6H), 7.65 (d,  $J = 15.9$  Hz, 1H).  $^{13}\text{C}$  NMR  $\delta$  ppm: 13.93, 19.40, 31.00, 64.60, 118.08, 133.90, 126.86, 127.10, 127.99, 128.21, 128.68, 128.94, 130.28, 137.18, 139.52, 144.20, 167.35. EI  $m/z$ : 306 ( $\text{M}^+$ , 100), 250 (48), 203 (45), 178 (39), 101 (19), 77 (15).

**(E)-butyl 3-(3-((E)-styryl)phenyl)acrylate (4)**. Lit.<sup>2</sup>  $^1\text{H}$  NMR ( $\text{CDCl}_3$ , 400 MHz)  $\delta$  ppm: 0.96 (t,  $J = 7.3$  Hz, 3H), 1.37-1.48 (m, 2H), 1.63-1.72 (m, 2H), 4.21 (t,  $J = 6.8$  Hz, 2H), 6.47 (d,  $J = 15.9$  Hz, 1H), 7.10

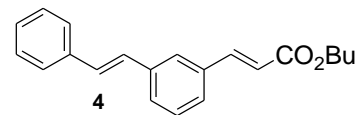

(d,  $J = 6.2$  Hz, 2H), 7.30-7.42 (m, 4H), 7.45-7.53 (m, 4H), 7.63 (b s, 1H), 7.67 (d,  $J = 16.1$  Hz, 1H).  $^{13}\text{C}$  NMR  $\delta$  ppm: 13.93, 19.41, 30.99, 64.66, 118.86, 126.31, 126.79, 127.25, 128.02, 128.09, 128.36, 128.92, 129.34, 129.88, 135.12, 137.19, 138.22, 144.56, 167.21. EI  $m/z$ : 306 ( $\text{M}^+$ , 100), 250 (23), 233 (24), 203 (51), 189 (19), 178 (32), 101 (11), 77 (6).

**(E)-methyl 3-(2-((E)-styryl)phenyl)acrylate (5)**. Lit.<sup>3</sup>  $^1\text{H}$  NMR ( $\text{CDCl}_3$ , 400 MHz)  $\delta$  ppm: 3.79 (s, 3H), 6.35 (d,  $J = 15.7$  Hz, 1H), 6.96 (d,  $J = 16.1$  Hz, 1H), 7.21-7.43 (m, 6H), 7.48-7.63 (m, 4H), 8.09 (d,  $J = 15.7$  Hz, 1H).  $^{13}\text{C}$  NMR  $\delta$

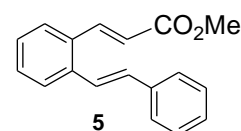

ppm: 51.91, 120.21, 125.73, 126.99, 127.17, 127.49, 127.95, 128.26, 128.92, 130.25, 132.91, 133.015, 137.28, 137.78, 142.81, 167.45. EI  $m/z$ : 306 ( $\text{M}^+$ , 100), 264 (17), 323 (14), 205 (100), 204 (50), 190 (16), 178 (14), 127 (18), 101 (22), 91 (58), 77 (13).

**(E)-butyl 3-(4-((E)-4-(trifluoromethyl)styryl)phenyl)acrylate (6)**.

Lit.<sup>4</sup>  $^1\text{H}$  NMR ( $\text{CDCl}_3$ , 400 MHz):  $\delta$  7.66 (d,  $J = 16.1$  Hz, 1H), 7.62-7.57 (m, 4H), 7.55-7.50 (m, 4H), 7.16 (s, 2H), 6.44 (d,  $J = 16.1$  Hz, 1H), 4.20 (t,  $J = 6.8$  Hz, 2H), 1.70-1.63 (m, 2H), 1.46-1.36 (m, 2H), 0.95 (t,  $J = 7.3$  Hz, 3H).  $^{13}\text{C}$  NMR:  $\delta$  167.05, 143.77, 138.49, 134.33, 130.26, 128.53, 128.37, 127.18, 126.71, 125.66, 118.33, 64.47, 30.78, 19.20, 13.73. EI  $m/z$ : 375 ( $\text{M}^+ + 1$ , 25), 374 ( $\text{M}^+$ , 100), 318 (98), 301 (43), 274 (21), 261 (11), 246 (13), 203 (35), 150 (12), 127 (12), 101 (10).

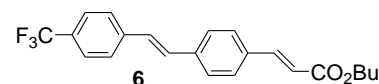

**(E)-butyl 3-(4-((E)-4-methoxystyryl)phenyl)acrylate (7)**.  $^1\text{H}$ -NMR

( $\text{CDCl}_3$ , 400 MHz)  $\delta$  ppm: 0.95 (t,  $J = 7.4$  Hz, 3H), 1.41 (sestet,  $J = 7.4$  2H), 1.63-1.72 (m, 2H), 3.79 (s, 3H), 4.19 (t,  $J = 6.7$  2H), 6.40 (d,  $J = 16.1$  1H), 6.87 (d,  $J = 8.7$  2H), 6.92 (d,  $J = 16.3$  1H), 7.08 (d,  $J = 16.3$ , 1H), 7.42 (d,  $J = 8.7$ , 2H), 7.44-7.48 (m, 4H), 7.62 (d,  $J =$

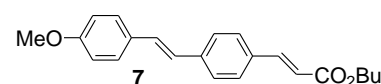

<sup>3</sup> C. Wang, L.-S. Tan, J.-P., He, H.-W., Hu, J.-H. Xu, *Synth. Commun.* 2003, **33**, 773.

<sup>4</sup> V. Calò, A. Nacci, A. Monopoli, P. Cotugno, *Angew. Chem. Int. Ed.* 2009, **48**, 6101.



16.1, 1H).  $^{13}\text{C}$ -NMR  $\delta$ : 13.77, 19.19, 30.75, 55.28, 64.38, 114.14, 117.45, 125.56, 126.56, 127.91, 128.46, 129.55, 129.67, 133.15, 139.64, 144.09, 159.54, 167.21. EI m/z: 336 ( $\text{M}^+$ , 100), 280 (16), 261 (8), 236 (8), 220 (8), 201 (8), 189 (9), 135 (11), 117 (6).  $\text{C}_{22}\text{H}_{24}\text{O}_3$  (336.17): calcd. C, 78.54; H, 7.19; O, 14.27; found C, 78.72; H, 7.32; O, 14.05.

**(E)-methyl 3-(4-((E)-2-(pyridin-4-yl)vinyl)phenyl)acrylate (8).** Lit.<sup>5</sup>

$^1\text{H}$  NMR ( $\text{CDCl}_3$ , 400 MHz)  $\delta$  ppm: 3.82 (s, 3H), 6.49 (d,  $J=15.9$ ,

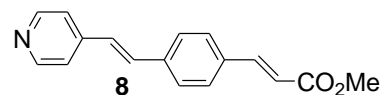

1H), 7.14 (d,  $J=16.3$ , 1H), 7.40-7.81 (m, 8H), 8.69 (b s, 2H).  $^{13}\text{C}$  NMR  $\delta$  ppm: 51.99, 119.18, 125.44, 128.26, 128.90, 136.15, 136.82, 137.05, 143.74, 144.99, 149.72, 167.29. EI m/z: 265 ( $\text{M}^+$ , 100), 234 (48), 206 (57), 178 (16), 152 (17), 102 (16), 89 (11).

**(E)-butyl 3-(2-((E)-2-(pyridin-4-yl)vinyl)phenyl)acrylate (9).**  $^1\text{H}$  NMR

( $\text{CDCl}_3$ , 400 MHz)  $\delta$  ppm: 0.95 (t,  $J=7.4$  3H), 1.37-1.48 (m, 2H), 1.63-1.72

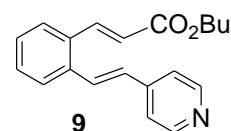

(m, 2H), 4.19 (t,  $J=6.7$  2H), 6.40 (d,  $J=15.9$ , 1H), 6.92 (d,  $J=16.1$ , 1H), 7.34-

7.61 (m, 6H), 7.65 (d,  $J=16.1$ , 1H), 8.08 (d,  $J=15.9$ , 1H), 8.60 (b s, 2H).  $^{13}\text{C}$  NMR  $\delta$  ppm: 13.94, 19.42, 30.94, 64.83, 121.53, 127.41, 127.74, 129.21, 129.55, 130.30, 131.35, 133.74, 136.11, 141.85, 145.74, 149.10, 166.94. EI m/z: 307 ( $\text{M}^+$ , 3), 251 (7), 234 (7), 206 (100), 178 (8), 165 (2), 152 (6), 128 (10), 115 (5), 102 (7), 79 (5), 57 (9).  $\text{C}_{20}\text{H}_{21}\text{NO}_2$  (307.16): calcd. C, 78.15; H, 6.89; N, 4.56; O, 10.41; found C, 78.40; H, 6.92; N, 4.50; O, 10.22.

**(E)-butyl 3-(4-((E)-4-(chloromethyl)styryl)phenyl)acrylate (10).**

$^1\text{H}$ -NMR ( $\text{CDCl}_3$ , 400 MHz)  $\delta$  ppm: 0.96 (t,  $J=7.4$  3H), 1.36-

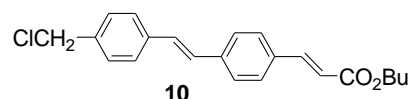

1.48 (m, 2H), 1.61-1.73 (m, 2H), 4.20 (t,  $J=6.6$  2H), 5.11 (s, 2H), 6.45 (d,  $J=15.7$ , 1H), 7.13 (two doublets,  $J=16.3$ , 2H), 7.36 (d,  $J=8.1$ , 2H), 7.52 (d,  $J=8.1$ , 2H), 7.53 (br s, 4H), 7.67 (d,  $J=16.3$ , 1H).  $^{13}\text{C}$ -NMR  $\delta$  ppm: 14.00, 19.42, 30.98, 64.66, 66.23, 118.10, 127.01, 127.14, 128.43, 128.72, 128.97, 129.59, 133.97, 135.79, 137.20, 139.29, 144.19, 167.38.  $\text{C}_{22}\text{H}_{23}\text{ClO}_2$  (354.14): calcd. C, 74.46; H, 6.53; Cl, 9.99; O, 9.02; found C, 74.63; H, 6.45; Cl, 9.90; O, 8.96.

**(E)-ethyl 3-(4-((E)-3-butoxy-3-oxoprop-1-en-1-yl)phenyl)-3-**

**phenylacrylate (11).**  $^1\text{H}$  NMR ( $\text{CDCl}_3$ , 400 MHz)  $\delta$  ppm: 0.93 (t,  $J=$

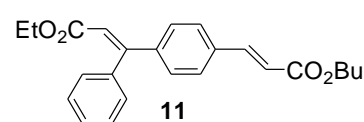

7.3, 3H), 1.09 (t,  $J=7.1$ , 3H), 1.34-1.46 (m, 2H), 1.61-1.71 (m, 2H), 4.02 (q,  $J=7.1$  Hz, 2H), 4.18 (t,  $J=6.8$ , 2H), 6.37 (s, 1H), 6.42 (d,  $J=15.9$ , 1H), 7.15-7.18 (m, 2H), 7.29 (d,  $J=8.4$ , 2H), 7.34-7.39 (m, 3H), 7.45 (d,  $J=8.4$ , 2H), 7.62 (d,  $J=15.9$ , 1H).  $^{13}\text{C}$ -NMR  $\delta$

<sup>5</sup> C. M. Chung, M. Hasegawa, *J. Am Chem. Soc.* 1991, **113**, 7311

ppm: 13.80, 13.89, 19.18, 30.74, 60.16, 64.54, 118.20, 119.09, 127.94, 127.97, 128.03, 128.21, 128.27, 128.95, 128.66, 129.12, 135.39, 138.49, 142.37, 143.44, 143.49, 155.34, 165.90, 166.88. EI m/z: 378 ( $M^+$ , 93), 333 (50), 305 (20), 277 (44), 259 (54), 250 (62), 231 (35), 202 (100), 178 (18), 138 (10), 105 (20), 77 (12).  $C_{24}H_{26}O_4$  (378,18) calcd. C, 76.17; H, 6.92; O, 16.91; found C, 76.32; H, 6.96; O, 16.72.

**1-methoxy-4-((E)-4-((E)-styryl)styryl)benzene (12).** Lit.<sup>6</sup>  $^1H$

NMR ( $CDCl_3$ , 400 MHz)  $\delta$  ppm: 3.84 (s, 3H), 6.91 (d,  $J = 8.8$  Hz, 2H), 7.08-7.17 (m, 3H), 7.26 (s, 5H), 7.37 (t,  $J = 7.3$  Hz, 1H),

7.45-7.54 (m, 6H).  $^{13}C$  NMR  $\delta$  ppm: 55.34, 114.22, 125.68, 126.50, 126.58, 126.84, 127.58, 127.75, 128.01, 128.22, 128.41, 128.69, 129.81, 135.31, 136.44, 137.33, 159.42. EI m/z: 312 ( $M^+$ , 3), 251 (7), 234 (7), 206 (100), 178 (8), 165 (2), 152 (6), 128 (10), 115 (5), 102 (7), 79 (5), 57 (9).

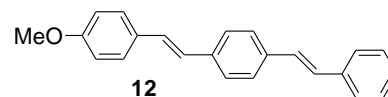

**1-((E)-styryl)-3-((E)-4-(trifluoromethyl)styryl)benzene (13).**  $^1H$ -

NMR ( $CDCl_3$ , 400 MHz)  $\delta$  ppm: 7.10-7.15 (m, 3H), 7.17 (d,  $J = 8.6$  Hz, 1H), 7.31-7.38 (m, 4H), 7.39-7.47 (m, 2H), 7.51 (m, 3H), 7.58-

7.62 (m, 3H), 7.64 (bs, 1H).  $^{13}C$ -NMR  $\delta$  ppm: 125.16, 125.19, 125.83, 125.90, 126.78, 128.49, 128.71, 128.95, 129.23, 129.25, 129.31, 137.23, 137.36, 137.47, 137.93, 138.07, 140.95. EI m/z: 350 ( $M^+$ , 100), 265 (9), 203 (21), 178 (25), 165 (14).  $C_{23}H_{17}F_3$  (350,13): calcd. C, 78.84; H, 4.89; F, 16.27; found C, 78.96; H, 4.95; F, 16.09.

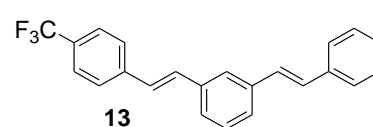

**(E)-butyl 3-(biphenyl-4-yl)acrylate (14).** Lit.<sup>2</sup>  $^1H$ -NMR ( $CDCl_3$ , 400

MHz)  $\delta$  ppm: 0.98 (t,  $J = 7.5$  Hz, 3H), 1.41-1.51 (m, 2H), 1.64-1.75 (m,

2H), 4.23 (t,  $J = 6.8$  Hz, 2H), 6.48 (d,  $J = 15.9$  Hz, 1H), 7.37 (t,  $J = 7.3$  Hz, 1H), 7.46 (t,  $J = 7.2$  Hz, 2H), 7.57-7.66 (m, 6H), 7.72 (d,  $J = 15.9$  Hz, 1H).  $^{13}C$  NMR:  $\delta$  13.71, 19.21, 30.81, 64.43, 118.19, 127.01, 127.50, 127.80, 128.51, 128.87, 133.47, 140, 18, 142.97, 144.03, 167.08. EI m/z: 280 ( $M^+$ , 53), 224 (100), 207 (55), 178 (65), 165 (22), 152 (19), 103 (5), 89 (12).

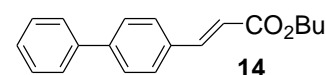

**(E)-4-styryl-biphenyl (15).** Lit.<sup>7</sup>  $^1H$ -NMR ( $CDCl_3$ , 400 MHz)  $\delta$  ppm:

7.16 (m, 2H), 7.27 (t,  $J = 7.3$  Hz, 1H), 7.33-7.40 (m, 3H), 7.45 (t,  $J = 7.3$

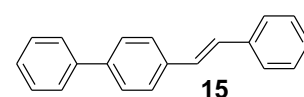

<sup>6</sup> D. P. Flaherty, Y. Dong, J. L. Vennerstrom *Tetrahedron Lett.*, 2009, **50**, 6228.

<sup>7</sup> M. Gruber, S. Chouzier, K. Koehler, L. Djakovitch *Appl. Catal., A: General* 2004, **265**, 161.

Hz, 2H), 7.50–7.56 (m, 3H), 7.59–7.65 (m, 5H).  $^{13}\text{C}$  NMR:  $\delta$  126.53, 126.92, 127.35, 127.65, 128.23, 128.31, 128.70, 128.79, 136.42, 137.37, 140.37, 140.69. EI m/z: 256 ( $\text{M}^+$ , 100), 178 (21), 165 (12), 152 (8), 101 (3).

**(E)-butyl 3-(biphenyl-3-yl)acrylate (16)**. Lit.<sup>2</sup>  $^1\text{H}$  NMR (400 MHz,  $\text{CDCl}_3$ ):  $\delta$  0.96 (t,  $J = 7.3$  Hz, 3H), 1.38–1.47 (m, 2H), 1.62–1.73 (m, 2H),

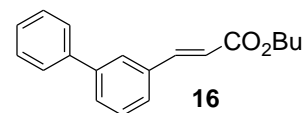

4.20 (t,  $J = 6.6$  Hz, 2H), 6.48 (d,  $J = 16.1$ , 1H), 7.35 (t,  $J = 7.3$  Hz, 1H), 7.43 (t,  $J = 7.3$ , 3H), 7.49 (d,  $J = 7.5$  Hz, 1H), 7.55–7.62 (m, 3H), 7.72 (d,  $J = 16.1$  Hz, 1H), 7.71 (s, 1H).  $^{13}\text{C}$ -NMR  $\delta$  ppm: 13.72, 19.21, 30.79, 64.47, 118.69, 126.79, 126.85, 127.14, 127.66, 128.86, 128.98, 129.30, 135.99, 140.45, 141.97, 144.44, 167.02. EI m/z: 280 ( $\text{M}^+$ , 38), 224 (100), 207 (53), 178 (68), 165 (26), 152 (24), 103 (6), 89 (14).

**(E)-butyl 3-(biphenyl-2-yl)acrylate (17)**. Lit.<sup>8</sup>  $^1\text{H}$ -NMR ( $\text{CDCl}_3$ , 400 MHz)  $\delta$  ppm: 0.93 (t,  $J = 7.3$  Hz, 3H), 1.35–1.45 (m, 2H), 1.58–1.67 (m, 2H), 4.14 (t,  $J =$

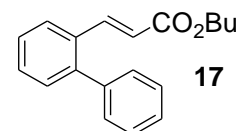

6.6 Hz, 2H), 6.39 (d,  $J = 15.9$  Hz, 1H), 7.29–7.33 (m, 2H), 7.35–7.46 (m, 7H), 7.72 (d,  $J = 15.9$  Hz, 1H).  $^{13}\text{C}$  NMR:  $\delta$  13.70, 19.18, 30.74, 64.26, 119.23, 126.73, 127.53, 127.62, 128.26, 129.77, 129.81, 130.50, 132.69, 142.98, 139.95, 143.63, 166.90. EI m/z: 280 ( $\text{M}^+$ , 5), 179 (10), 165 (13), 152 (8), 103 (2), 89 (6).

**(E)-3-styryl-biphenyl (18)**. Lit.<sup>9</sup>  $^1\text{H}$ -NMR ( $\text{CDCl}_3$ , 400 MHz)  $\delta$  ppm: 7.19 (s, 2H), 7.28 (t,  $J = 7.3$  Hz, 1H), 7.35–7.55 (m, 10H), 7.64 (dm,  $J = 7.1$  Hz, 2H), 7.73 (t,  $J = 1.8$  Hz, 1H).  $^{13}\text{C}$  NMR:  $\delta$  125.38, 125.44, 126.52, 126.56,

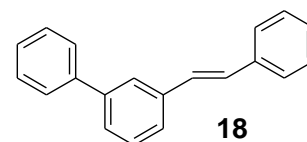

127.20, 127.39, 127.69, 128.65, 128.70, 128.77, 129.08, 129.12, 137.33, 137.85, 141.16, 141.77. EI m/z: 256 ( $\text{M}^+$ , 100), 178 (26), 165 (14), 152 (10), 128 (5), 101 (4).

**(E)-butyl 3-(4-((E)-3-ethoxy-3-oxoprop-1-en-1-yl)-2-((E)-styryl)phenyl)acrylate (19)**.  $^1\text{H}$ -NMR ( $\text{CDCl}_3$ , 400 MHz)  $\delta$  ppm:

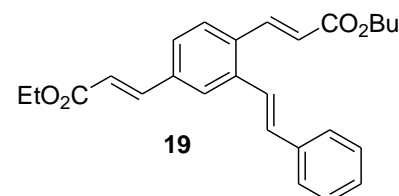

0.96 (t,  $J = 7.4$  3H), 1.32 (t,  $J = 7.3$  3H), 1.36–1.48 (m, 2H), 1.61–1.73 (m, 2H), 4.20 (t,  $J = 6.6$  2H), 4.25 (q,  $J = 7.3$  2H), 6.39 (d,  $J = 15.7$ , 1H), 6.50 (d,  $J = 16.1$ , 1H), 7.00 (d,  $J = 16.1$ , 1H), 7.26–7.64 (m, 10H), 8.05 (d,  $J = 16.1$ , 1H).  $^{13}\text{C}$ -NMR  $\delta$  ppm: 13.94, 14.52, 19.43, 30.94, 60.86, 64.80, 119.66, 121.38, 125.00, 126.95, 127.03, 127.06, 127.95, 128.53, 128.99, 133.61, 134.57, 136.16, 136.95, 138.30,

<sup>8</sup> M. Feuerstein, H. Doucet, M. Santelli, *Synlett* 2001, **12**, 1980.

<sup>9</sup> S. Mochida, K. Hirano, T. Satoh, M. Miura, *J. Org. Chem.* 2011, **76**, 3024.

141.45, 143.71, 166.92, 166.94. EI m/z: 404 ( $M^+$ , 18), 359 (5), 331 (7), 303 (21), 284 (4), 257 (39), 229 (96), 202 (39), 181 (9), 152 (25), 115 (9), 91 (100), 58 (32).  $C_{26}H_{28}O_4$  (404,2): calcd. C, 77.20; H, 6.98; O, 15.82; found C, 77.42; H, 6.85; O, 15.77.

**(E)-butyl 3-((2-phenyl-4-(E)-styryl)phenyl)acrylate (20).**  $^1H$ -NMR ( $CDCl_3$ , 400 MHz)  $\delta$  ppm: 0.91 (t,  $J=7.3$  Hz, 3H), 1.29-1.41 (m, 2H), 1.53-1.63 (m, 2H), 4.12 (t,  $J=6.6$ , 2H), 6.38 (d,  $J=15.9$ , 1H), 7.14 (d,  $J=14.4$ , 2H), 7.29-7.57 (m, 12H), 7.66-7.71

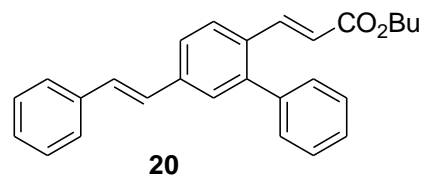

(m, 2H).  $^{13}C$ -NMR  $\delta$  ppm: 13.96, 19.37, 30.91, 64.46, 118.97, 128.50, 128.53, 128.57, 128.82, 128.91, 126.91, 127.25, 127.92, 128.99, 129.94, 130.01, 131.94, 137.14, 139.04, 140.02, 143.23, 143.68, 167.21. EI m/z: 382 ( $M^+$ , 38), 280 (56), 265 (21), 203 (100), 132 (17), 103 (14).  $C_{27}H_{26}O_2$  (382,19): calcd. C, 84.78; H, 6.85; O, 8.37; found C, 84.91; H, 6.81; O, 8.28.

**4-(4-Tolyl)biphenyl (21).** Lit.<sup>10</sup>  $^1H$ -NMR ( $CDCl_3$ , 400 MHz)  $\delta$  ppm: 2.42 (s, 3H), 7.27 (d,  $J=7.7$  Hz, 2H), 7.36 (t,  $J=7.3$  Hz, 1H), 7.46 (t,  $J=7.3$  Hz, 2H), 7.55 (2H, d,  $J=7.5$  Hz, 2H), 7.64 (d,  $J=7.3$  Hz, 2H), 7.66 (4H, m).  $^{13}C$ -NMR  $\delta$  ppm: 21.09, 126.87, 127.02, 127.28, 127.45, 128.78, 129.52, 137.12, 137.86, 139.87, 140.10, 140.82. EI m/z: 244 ( $M^+$ , 100), 228 (10), 165 (21), 152 (12), 122 (8), 91 (10).

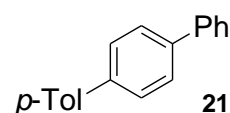

**4-(4-Anisyl)biphenyl (22).** Lit.<sup>11</sup>  $^1H$ -NMR ( $CDCl_3$ , 400 MHz)  $\delta$  ppm: 3.86 (s, 3H), 7.00 (d,  $J=8.8$  Hz, 2H), 7.35 (tt,  $J=7.3$  and 1.3 Hz, 1H), 7.46 (t,  $J=7.3$  Hz, 2H), 7.55-7.68 (s, 8H).  $^{13}C$ -NMR  $\delta$  ppm: 55.36, 114.29, 126.97, 127.01, 127.20, 127.42, 128.02, 128.76, 133.27, 139.51, 139.75, 140.79, 159.25. EI m/z: 260 ( $M^+$ , 100), 245 (47), 217 (26), 202 (11), 189 (8), 94 (5).

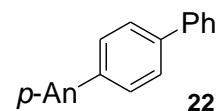

**4-(4-Anisyl)-1-(4-tolyl)benzene (23).** Lit.<sup>12</sup>  $^1H$ -NMR ( $CDCl_3$ , 400 MHz)  $\delta$  ppm: 2.41 (s, 3H), 3.87 (s, 3H), 6.99 (d,  $J=8.8$  Hz, 2H), 7.27 (d,  $J=7.9$  Hz, 2H), 7.54 (d,  $J=8.2$  Hz, 2H), 7.58 (t,  $J=8.8$  Hz, 2H), 7.63 (m, 4H).  $^{13}C$ -NMR

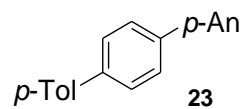

$\delta$  ppm: 21.06, 55.37, 114.30, 126.83, 127.01, 127.26, 128.03, 129.52, 133.38, 137.04, 137.96, 139.49, 160.08. EI m/z: 274 ( $M^+$ , 100), 259 (47), 231 (23), 215 (23), 165 (9), 137 (11), 115 (15).

<sup>10</sup> M. Kuriyama, R. Shimazawa, R. Shirai, *Tetrahedron* 2007, **63**, 9393.

<sup>11</sup> C.-H. Cho, I.-S. Kim, K. Park, *Tetrahedron* 2004, **60**, 4589.

<sup>12</sup> B.-T. Guan, Y. Wang, B.-Y. Li, D.-G. Yu, Z.-J. Shi, *J. Am. Chem. Soc.* 2008, **130**, 14468

**3(4-Tolyl)biphenyl (24).** Lit.<sup>10</sup> <sup>1</sup>H-NMR (CDCl<sub>3</sub>, 400 MHz) δ ppm: 2.43 (s, 3H), 7.29 (d, *J* = 7.9 Hz, 2H), 7.38 (tt, *J* = 7.4 and 1.3 Hz, 1H), 7.46 (t, *J* = 7.9 Hz, 2H), 7.52 (d, *J* = 7.7 Hz, 1H), 7.55–7.60 (m, 4H), 7.66 (m, 2H), 7.81 (t, *J* = 1.8 Hz, 1H). <sup>13</sup>C-NMR δ ppm: 21.09, 125.85, 125.93, 125.96, 127.08, 127.26, 127.34, 128.76, 129.11, 129.51, 137.18, 138.34, 141.31, 141.73, 141.77. EI m/z: 244 (M<sup>+</sup>, 100), 228 (12), 165 (12), 152 (6), 122 (6), 91 (5).

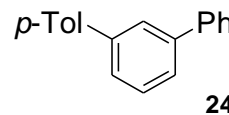

24

**3(4-Anisyl)-1(4-tolyl)benzene (25).** <sup>1</sup>H-NMR (CDCl<sub>3</sub>, 400 MHz) δ ppm: 2.38 (s, 3H), 3.83 (s, 3H), 6.96 (d, *J* = 8.79, 2H), 7.24 (d, *J* = 8.79, 2H), 7.40–7.65 (m, 7H), 7.72 (td like, *J* = 1.6 0.5, 1H); <sup>13</sup>C-NMR δ ppm: 21.24, 55.53, 114.44, 125.53, 125.61, 125.72, 127.25, 128.41, 129.23, 129.64, 134.03, 137.28, 138.61, 141.52, 141.87, 159.47. EI m/z: 274 (M<sup>+</sup>, 100), 259 (27), 231 (16), 215 (26), 202 (5), 189 (6), 165 (5), 152 (3), 137 (9), 115 (11), 101 (6), 89 (3). C<sub>20</sub>H<sub>18</sub>O (274,14) calcd. C, 87.56; H, 6.61; O, 5.83; found. C, 87.44; H, 6.65; O, 5.94.

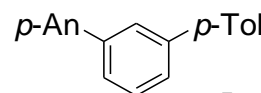

25

**3(4-Anisyl)biphenyl (26).** Lit.<sup>13</sup> <sup>1</sup>H-NMR (CDCl<sub>3</sub>, 400 MHz) δ ppm: 3.88 (s, 3H), 7.05 (d, *J* = 8.8 Hz, 2H), 7.39 (tt, *J* = 7.3 and 1.3 Hz, 1H), 7.46–7.69 (m, 9H), 7.8 (t, *J* = 1.28 Hz, 1H); <sup>13</sup>C-NMR δ ppm: 55.34, 114.27, 125.53, 125.69, 125.72, 127.24, 127.33, 128.23, 128.75, 129.11, 133.72, 141.31, 141.37, 141.76, 159.30. EI m/z: 260 (M<sup>+</sup>, 100), 245 (29), 217 (22), 202 (16), 189 (8), 130 (11), 94 (7).

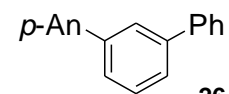

26

**2(4-Anisyl)biphenyl (27).** Lit.<sup>10</sup> <sup>1</sup>H-NMR (CDCl<sub>3</sub>, 400 MHz) δ ppm: 2.31 (s, 3H), 7.00–7.06 (m, 4H), 7.12–7.25 (m, 5H), 7.38–7.45 (4H, m). <sup>13</sup>C-NMR δ ppm: 21.06, 126.35, 127.21, 127.42, 127.83, 128.58, 129.73, 129.87, 130.59, 136.02, 138.58, 140.54, 141.73. EI m/z: 244 (M<sup>+</sup>, 89), 229 (100), 228 (58), 215 (12), 202 (14), 165 (7), 152 (4), 113 (12).

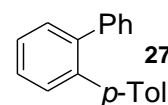

27

<sup>13</sup> F. Beaumard, P. Dauban, R. H. Dodd, Org. Lett. 2009, **11**, 1801.

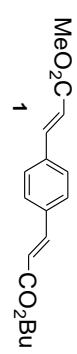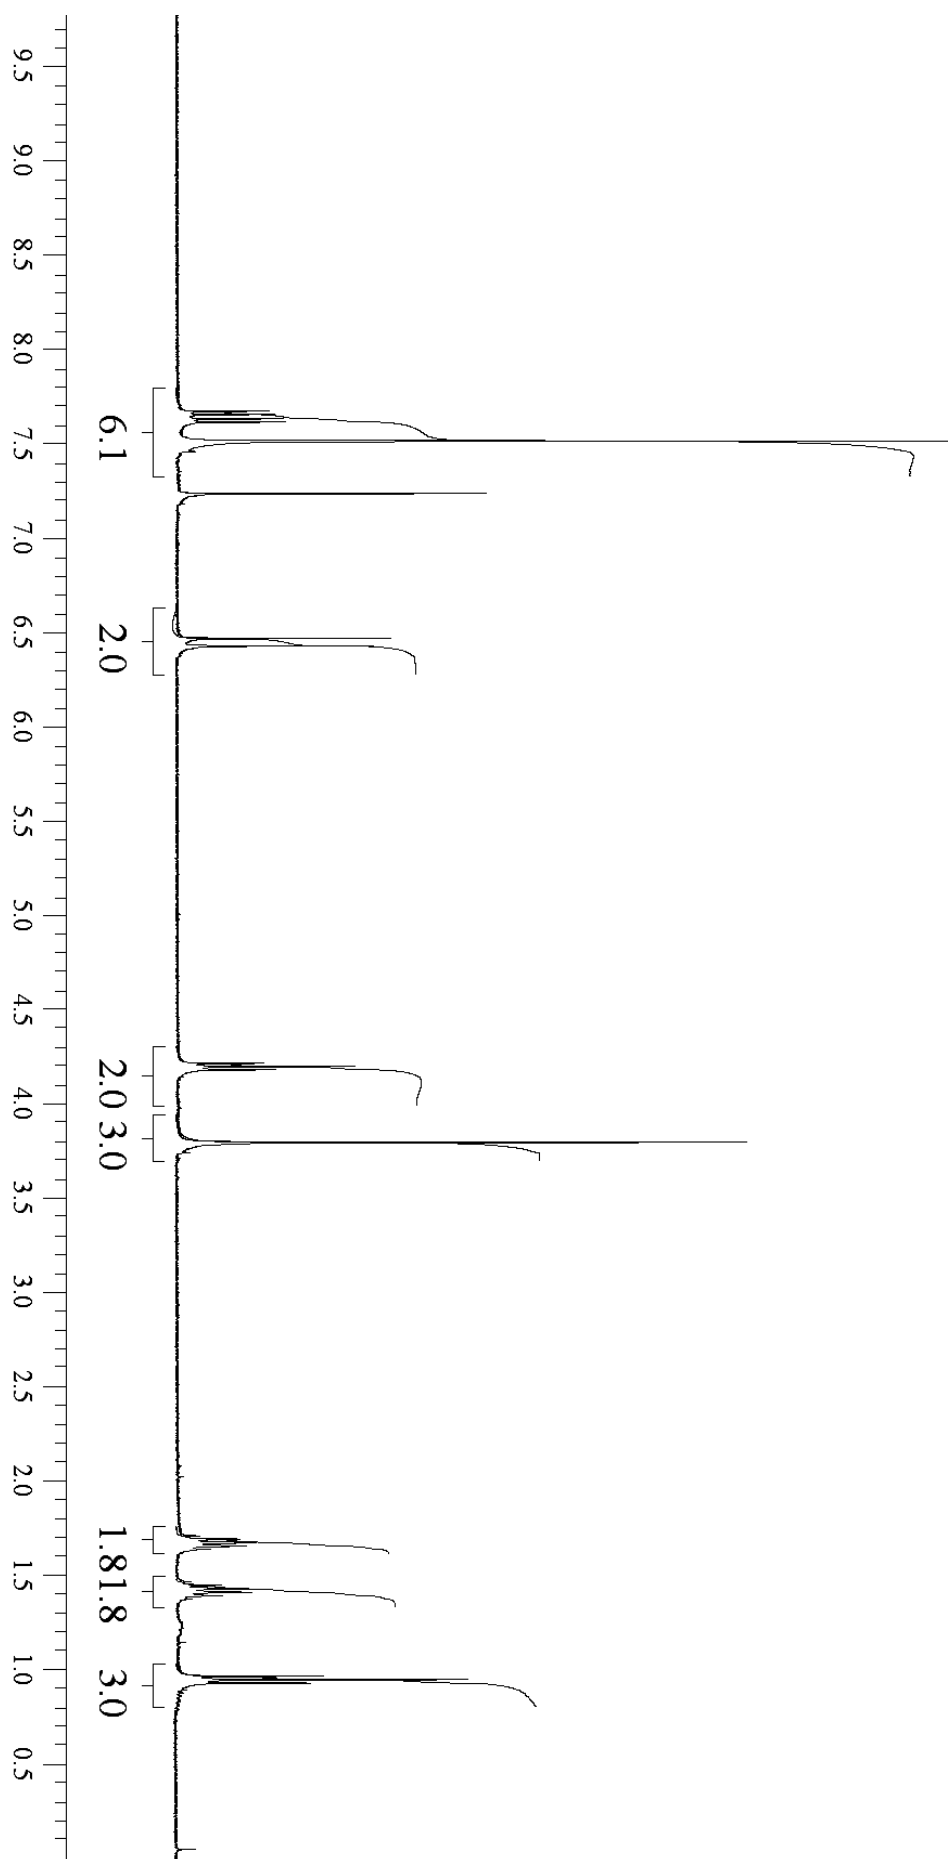

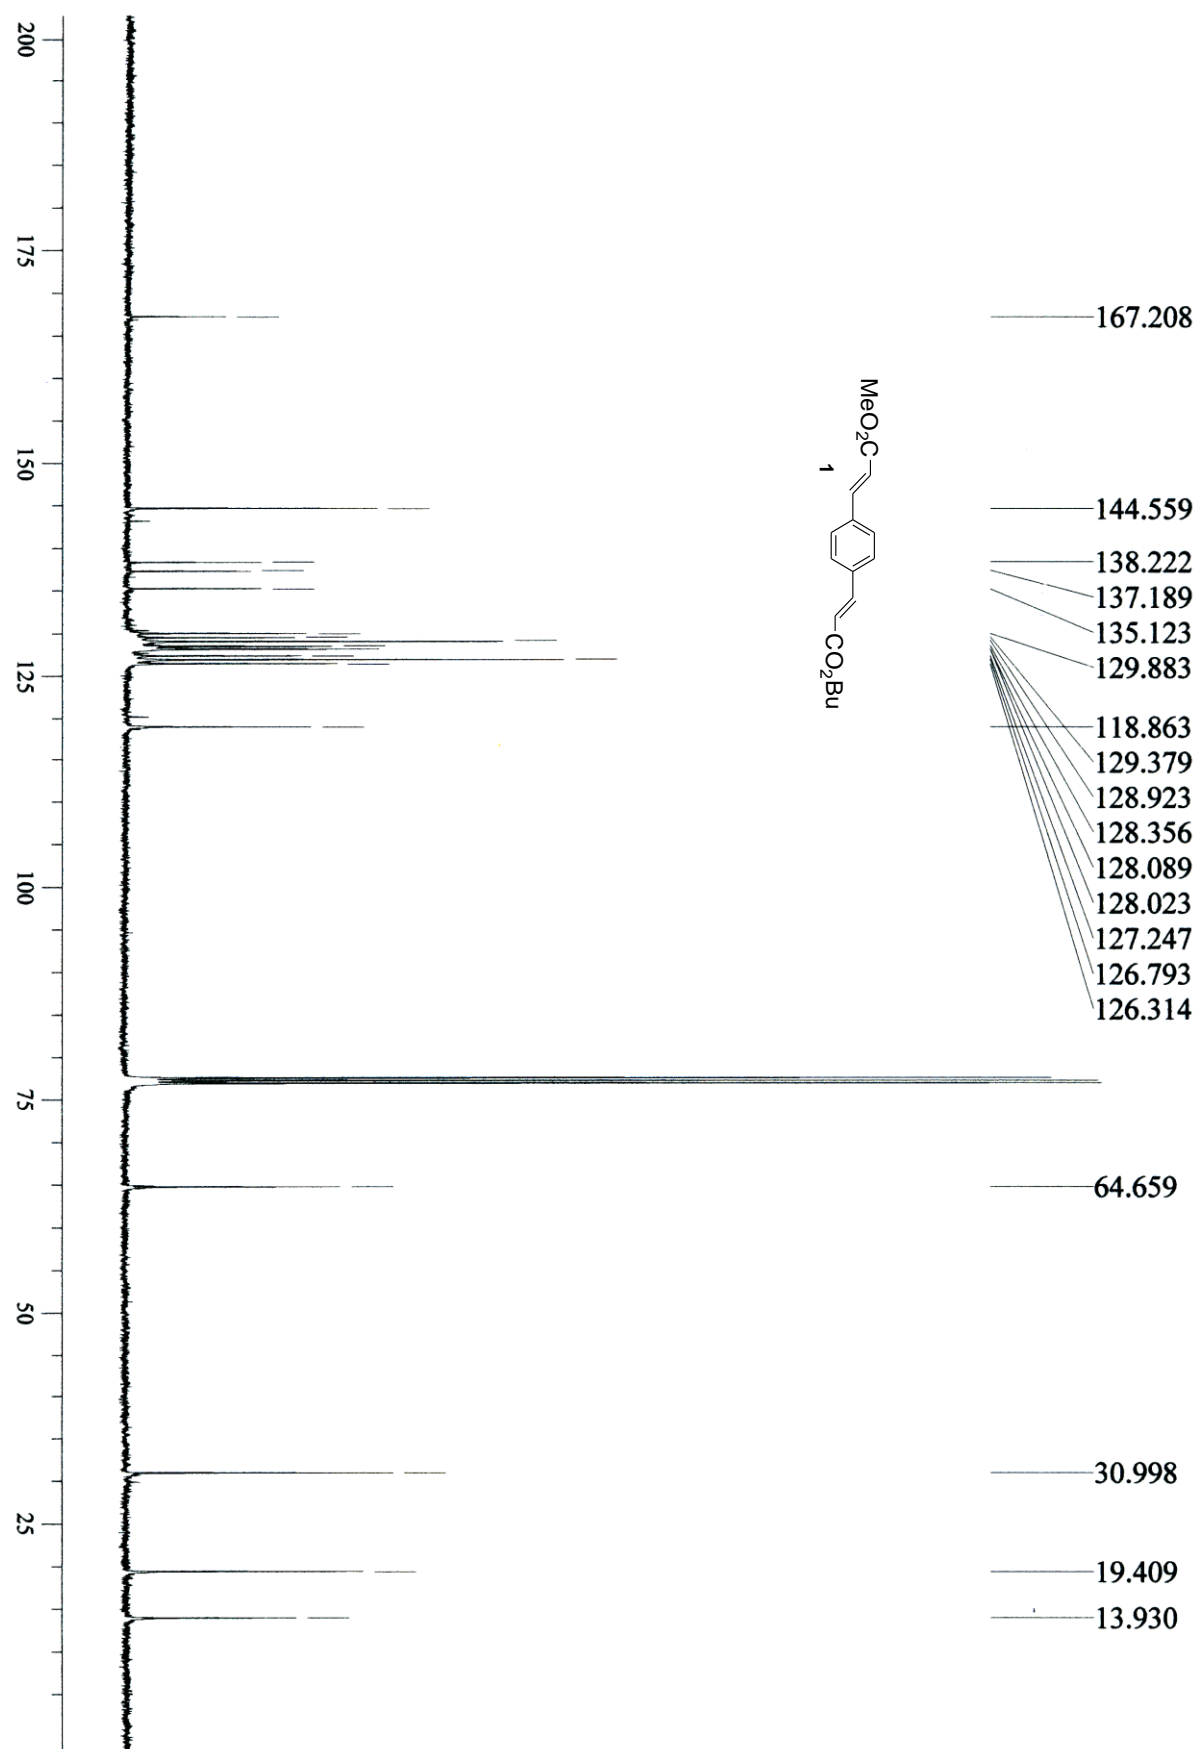

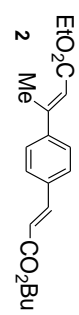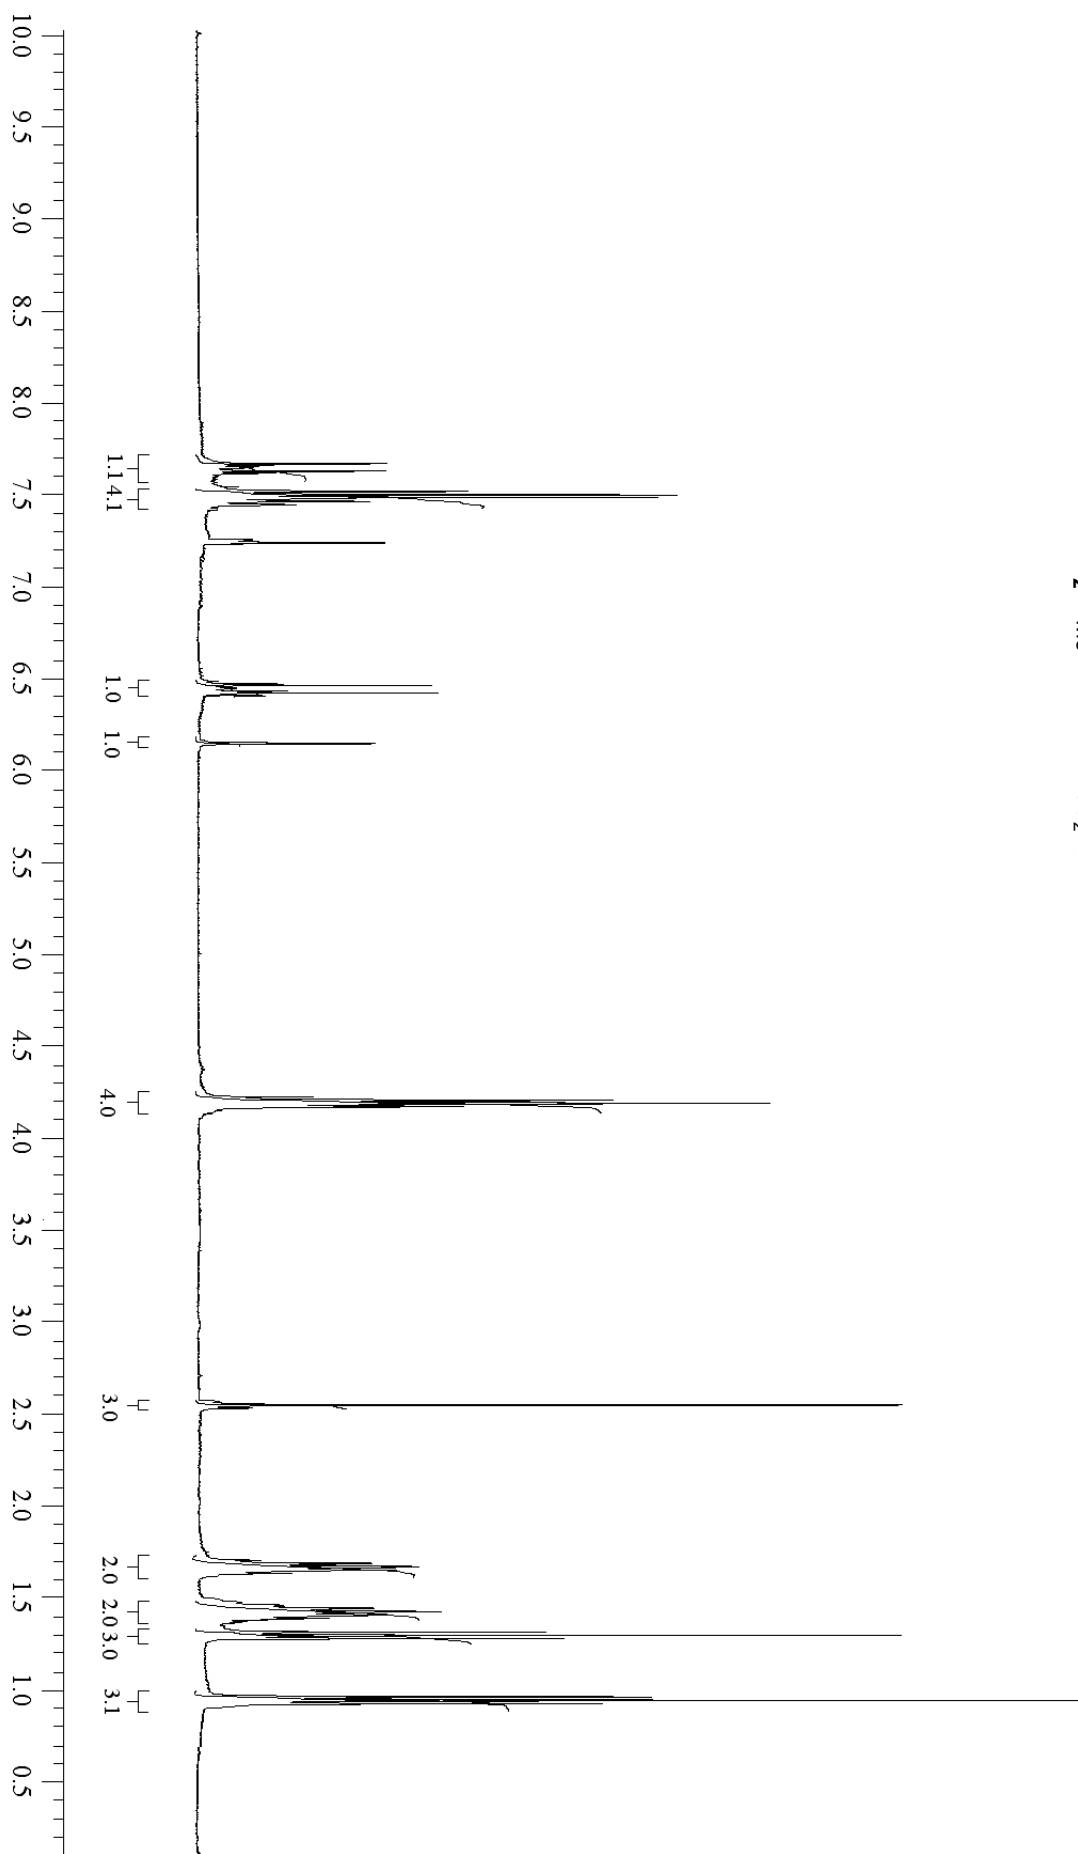



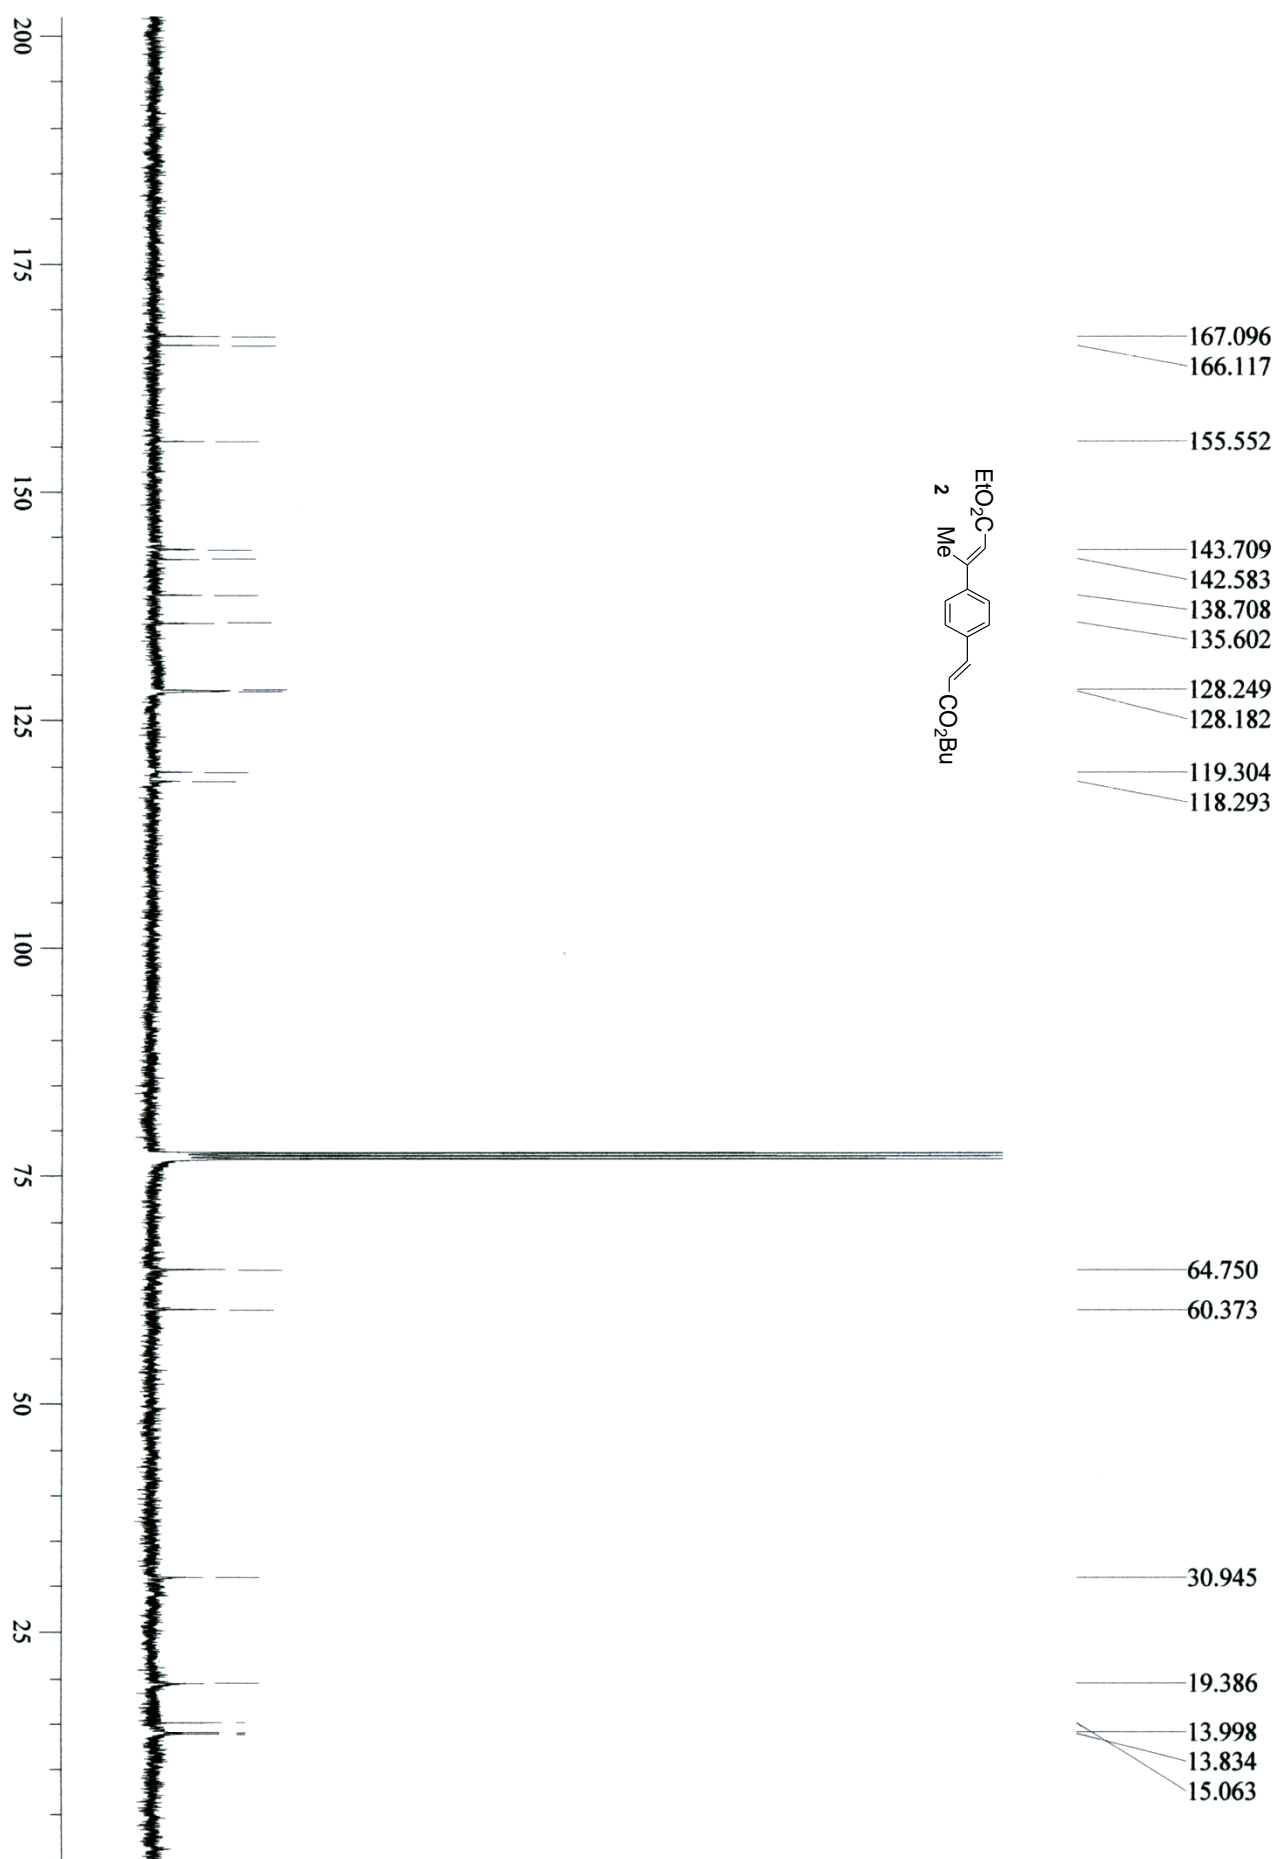

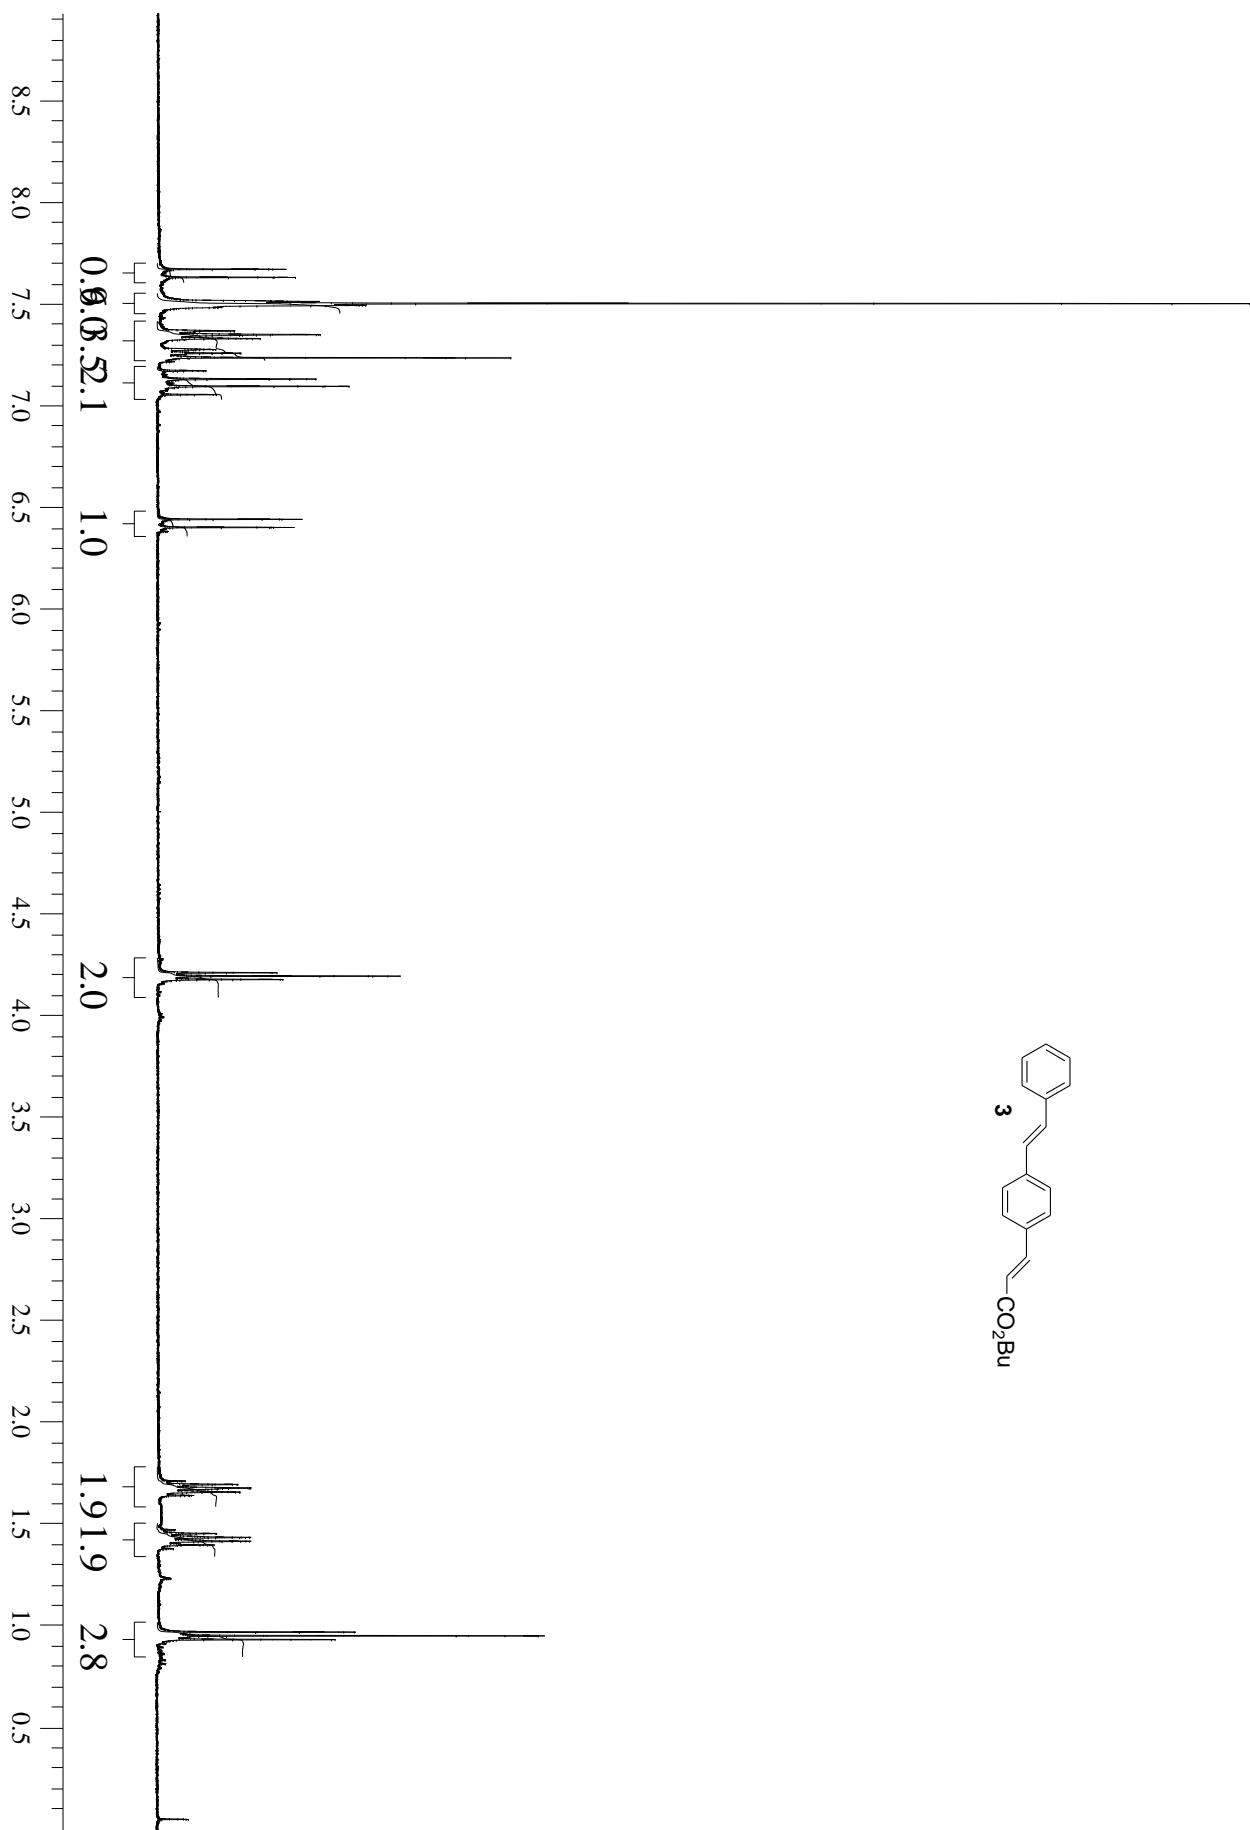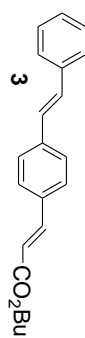

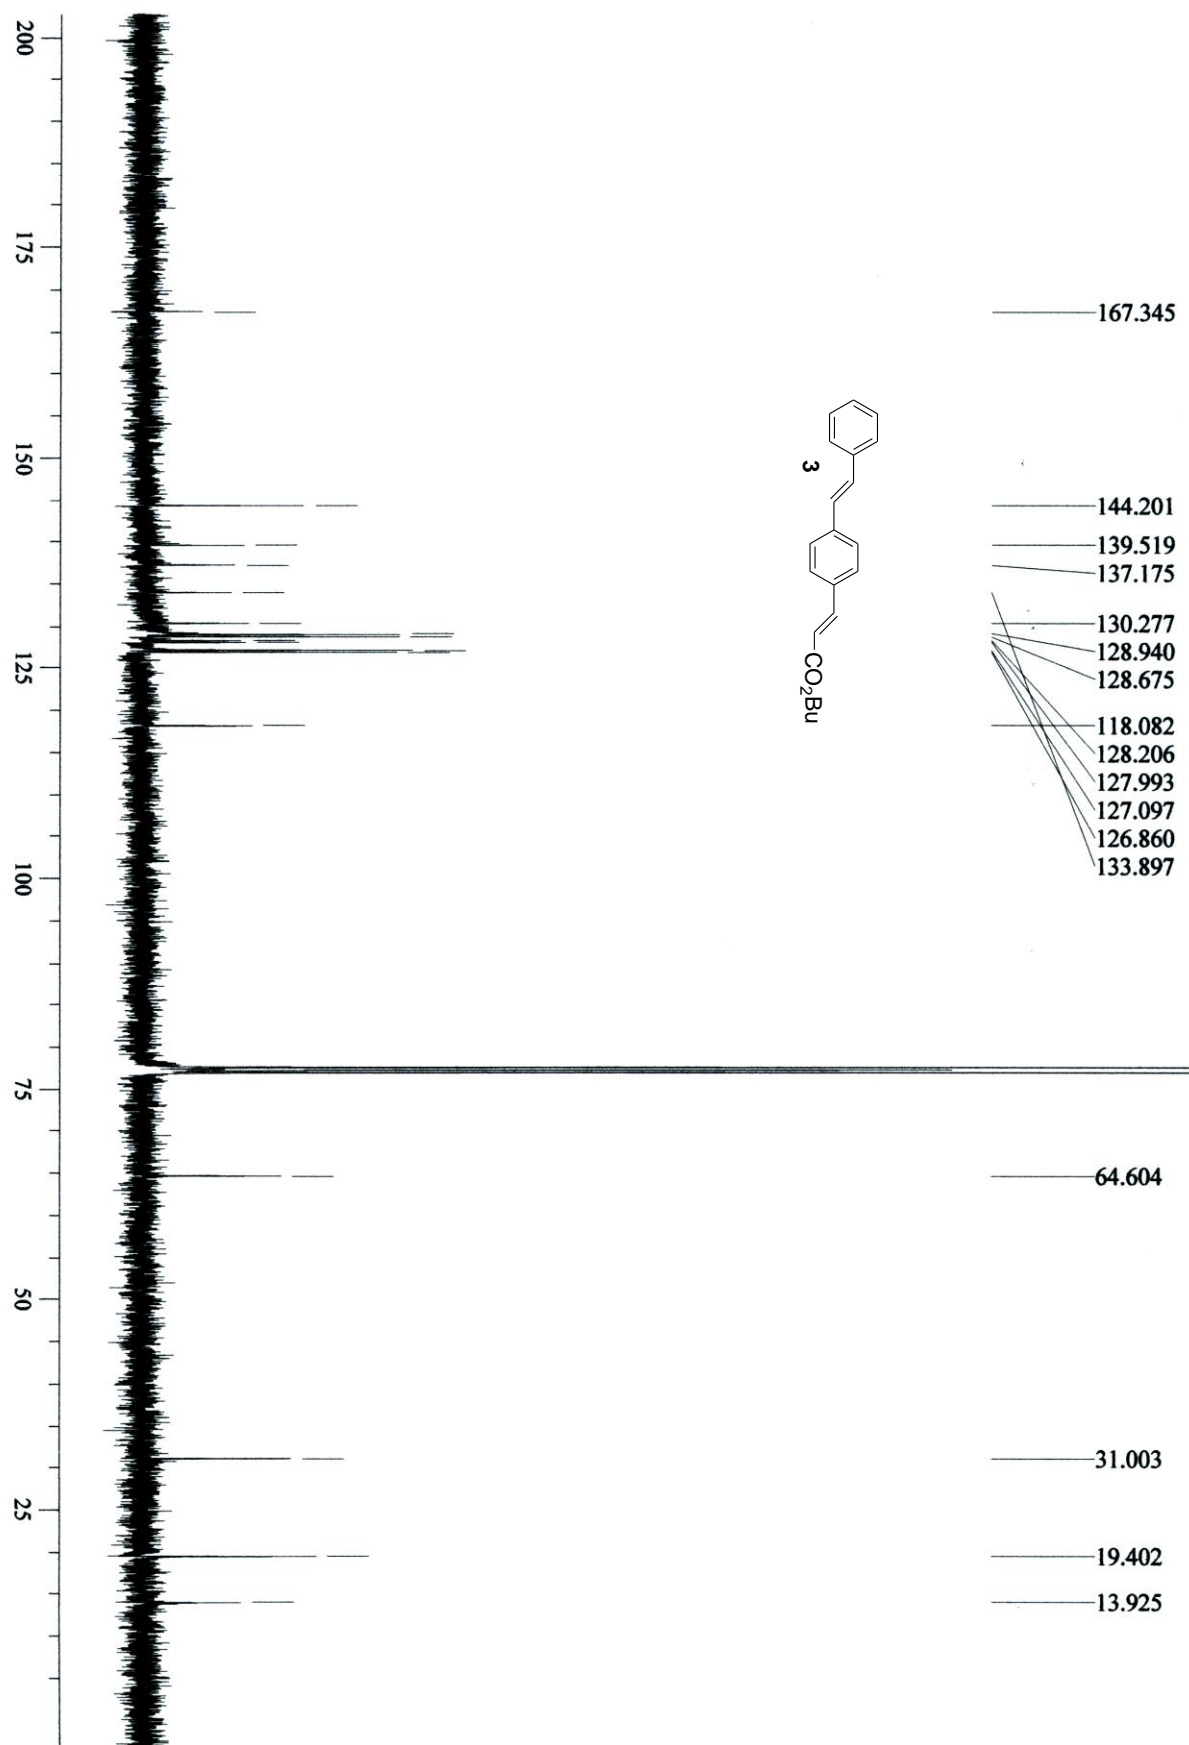

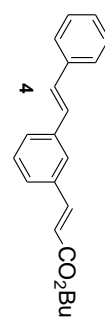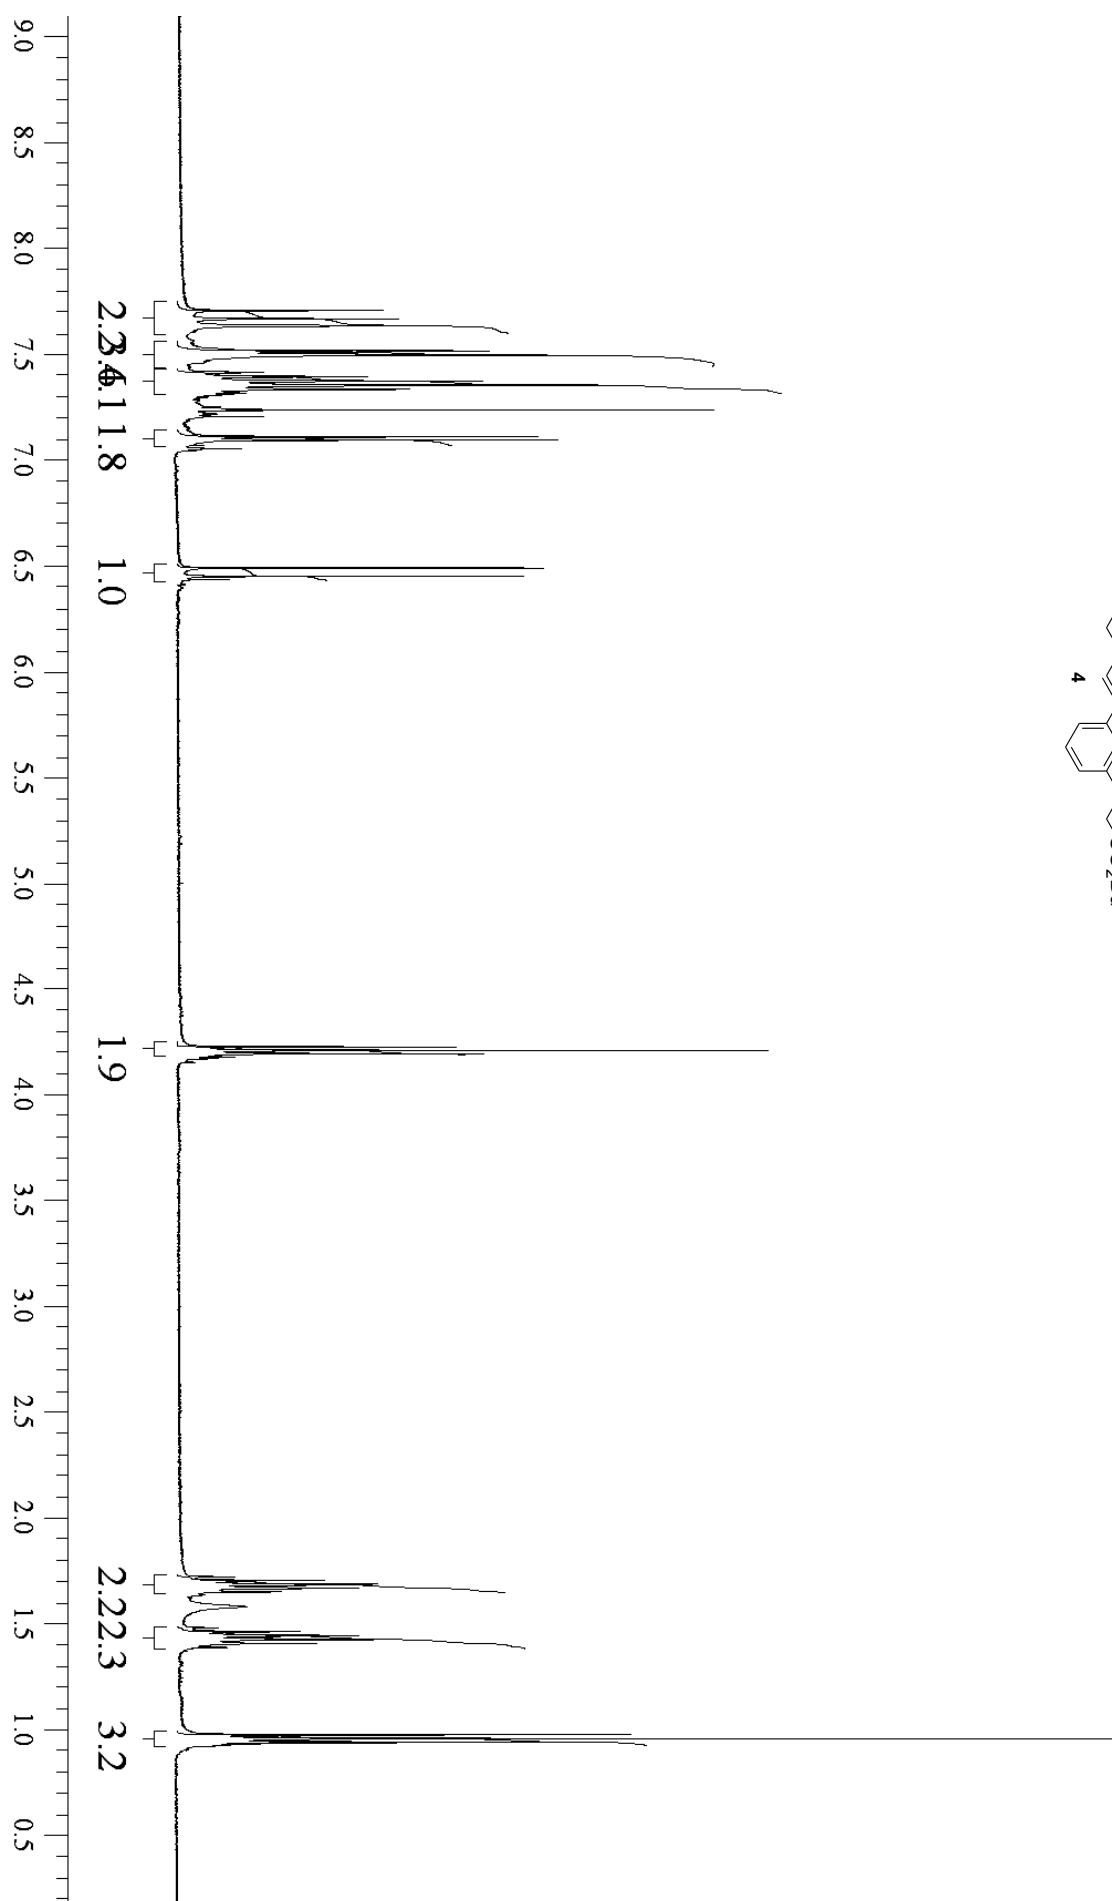

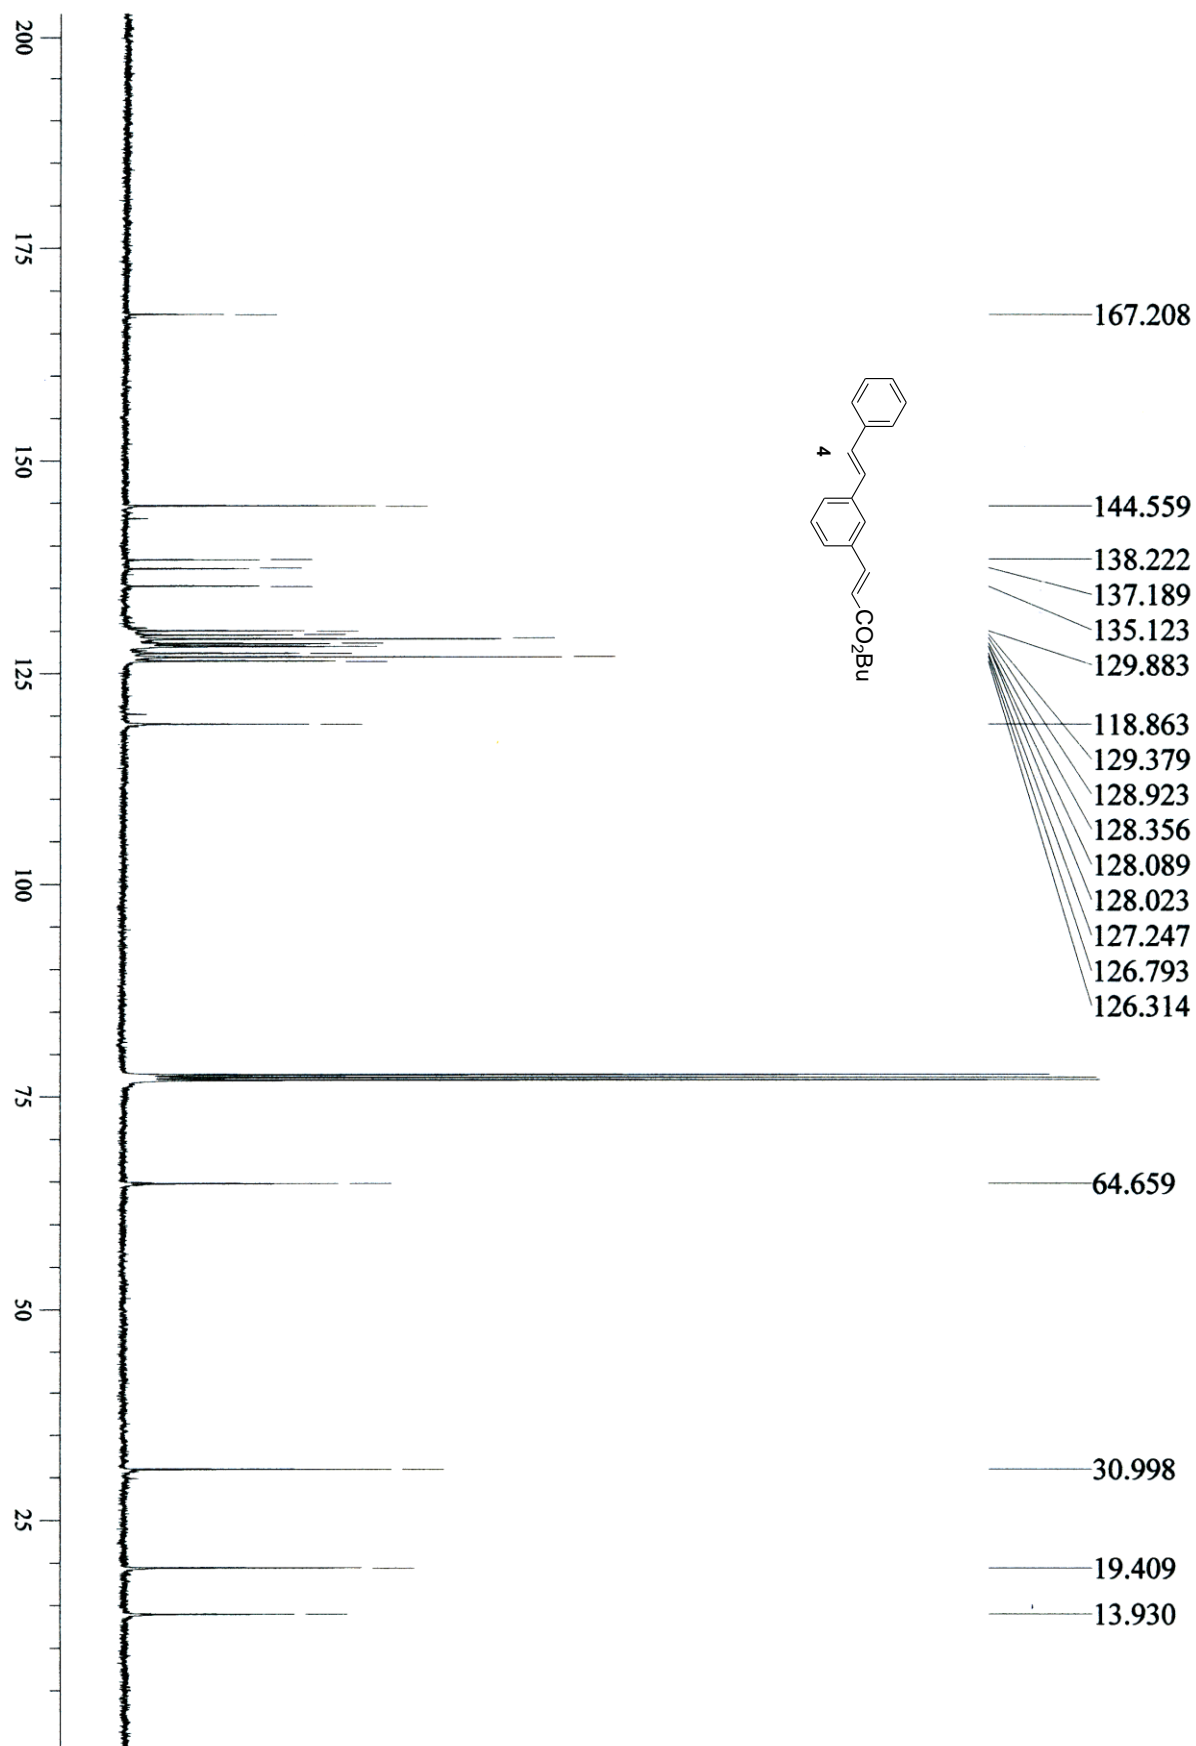

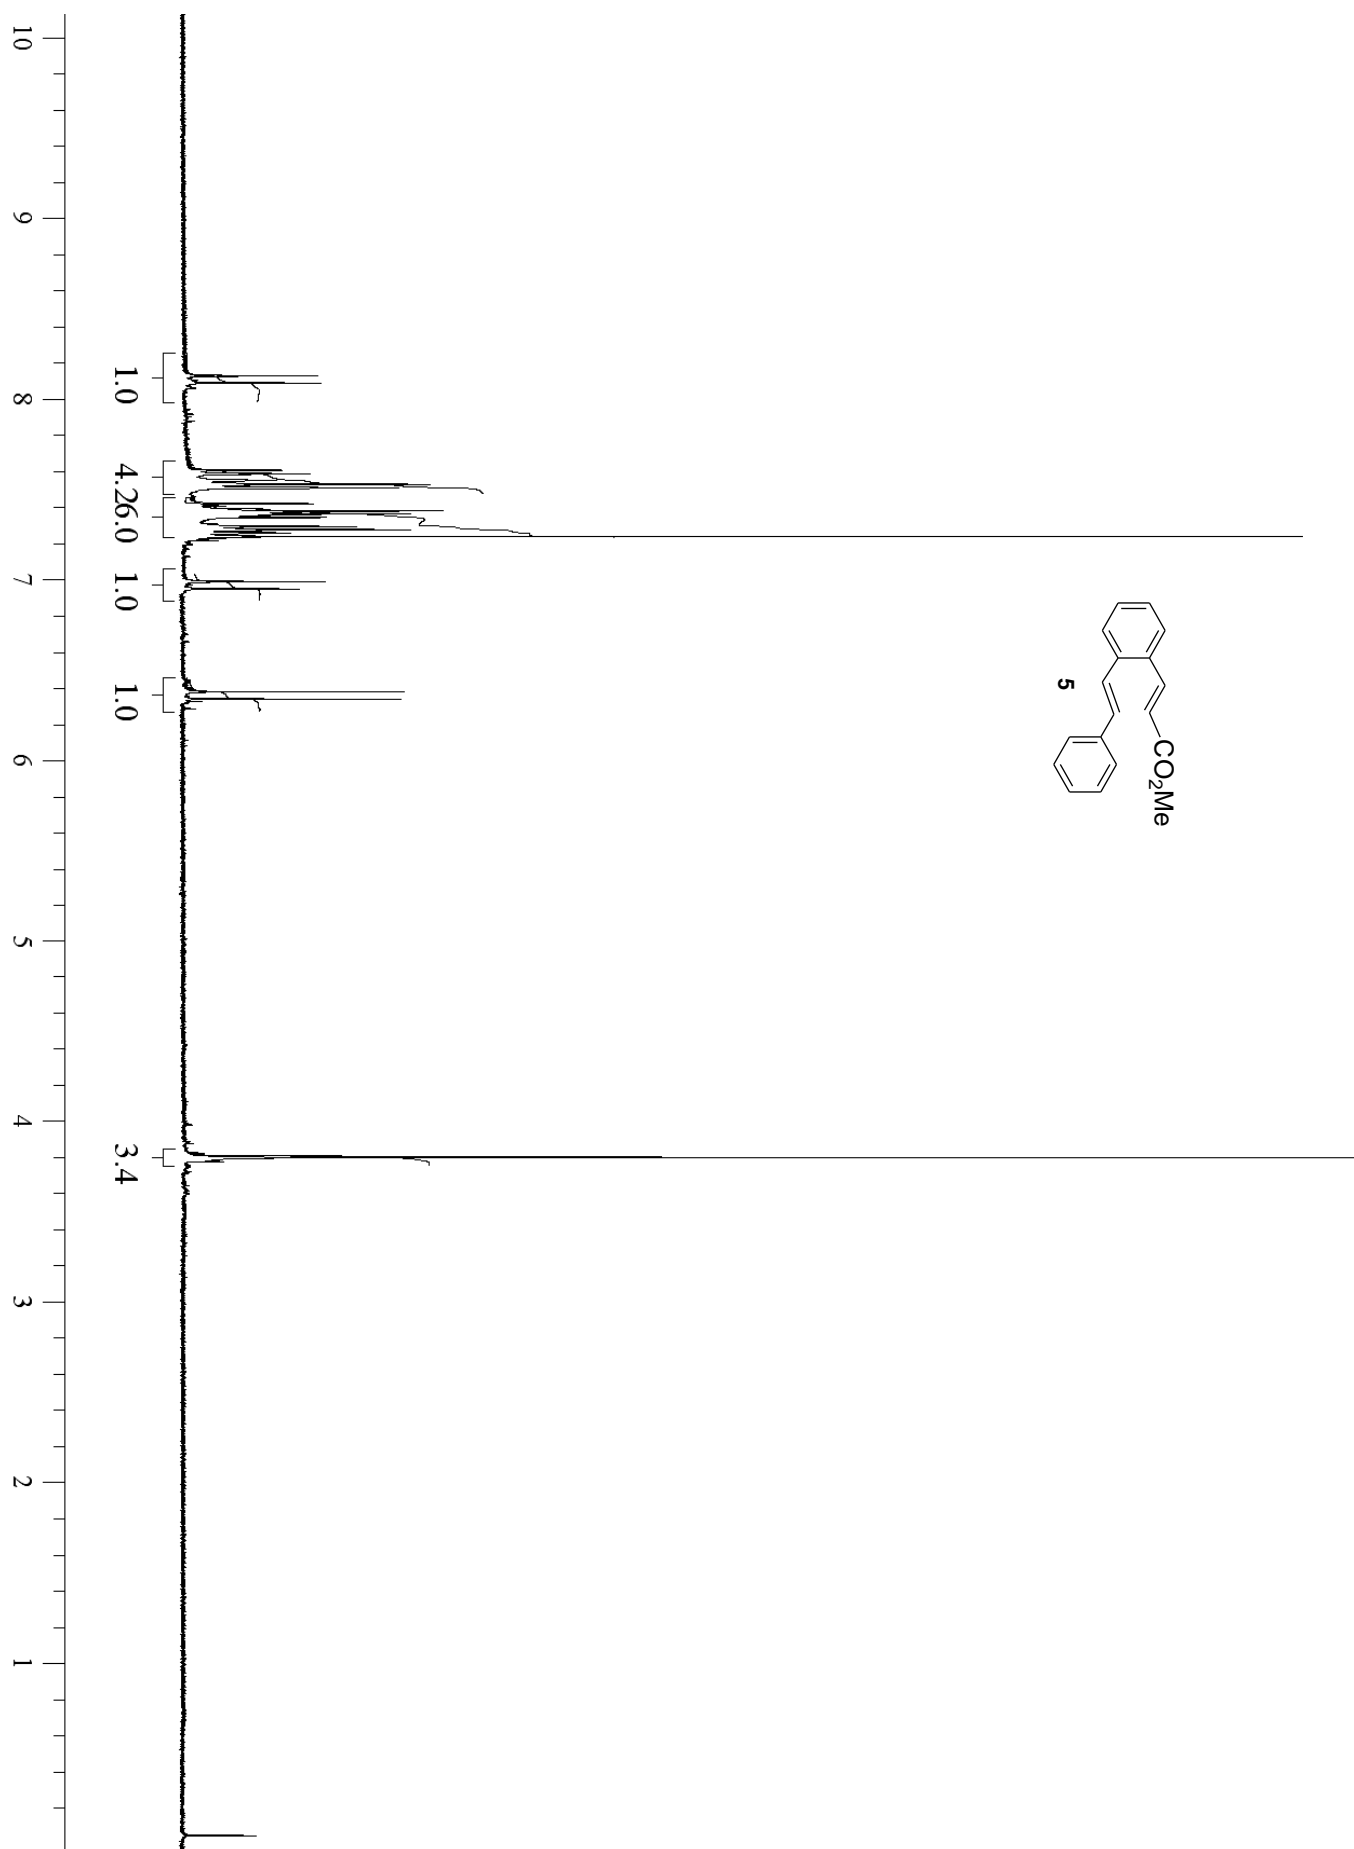

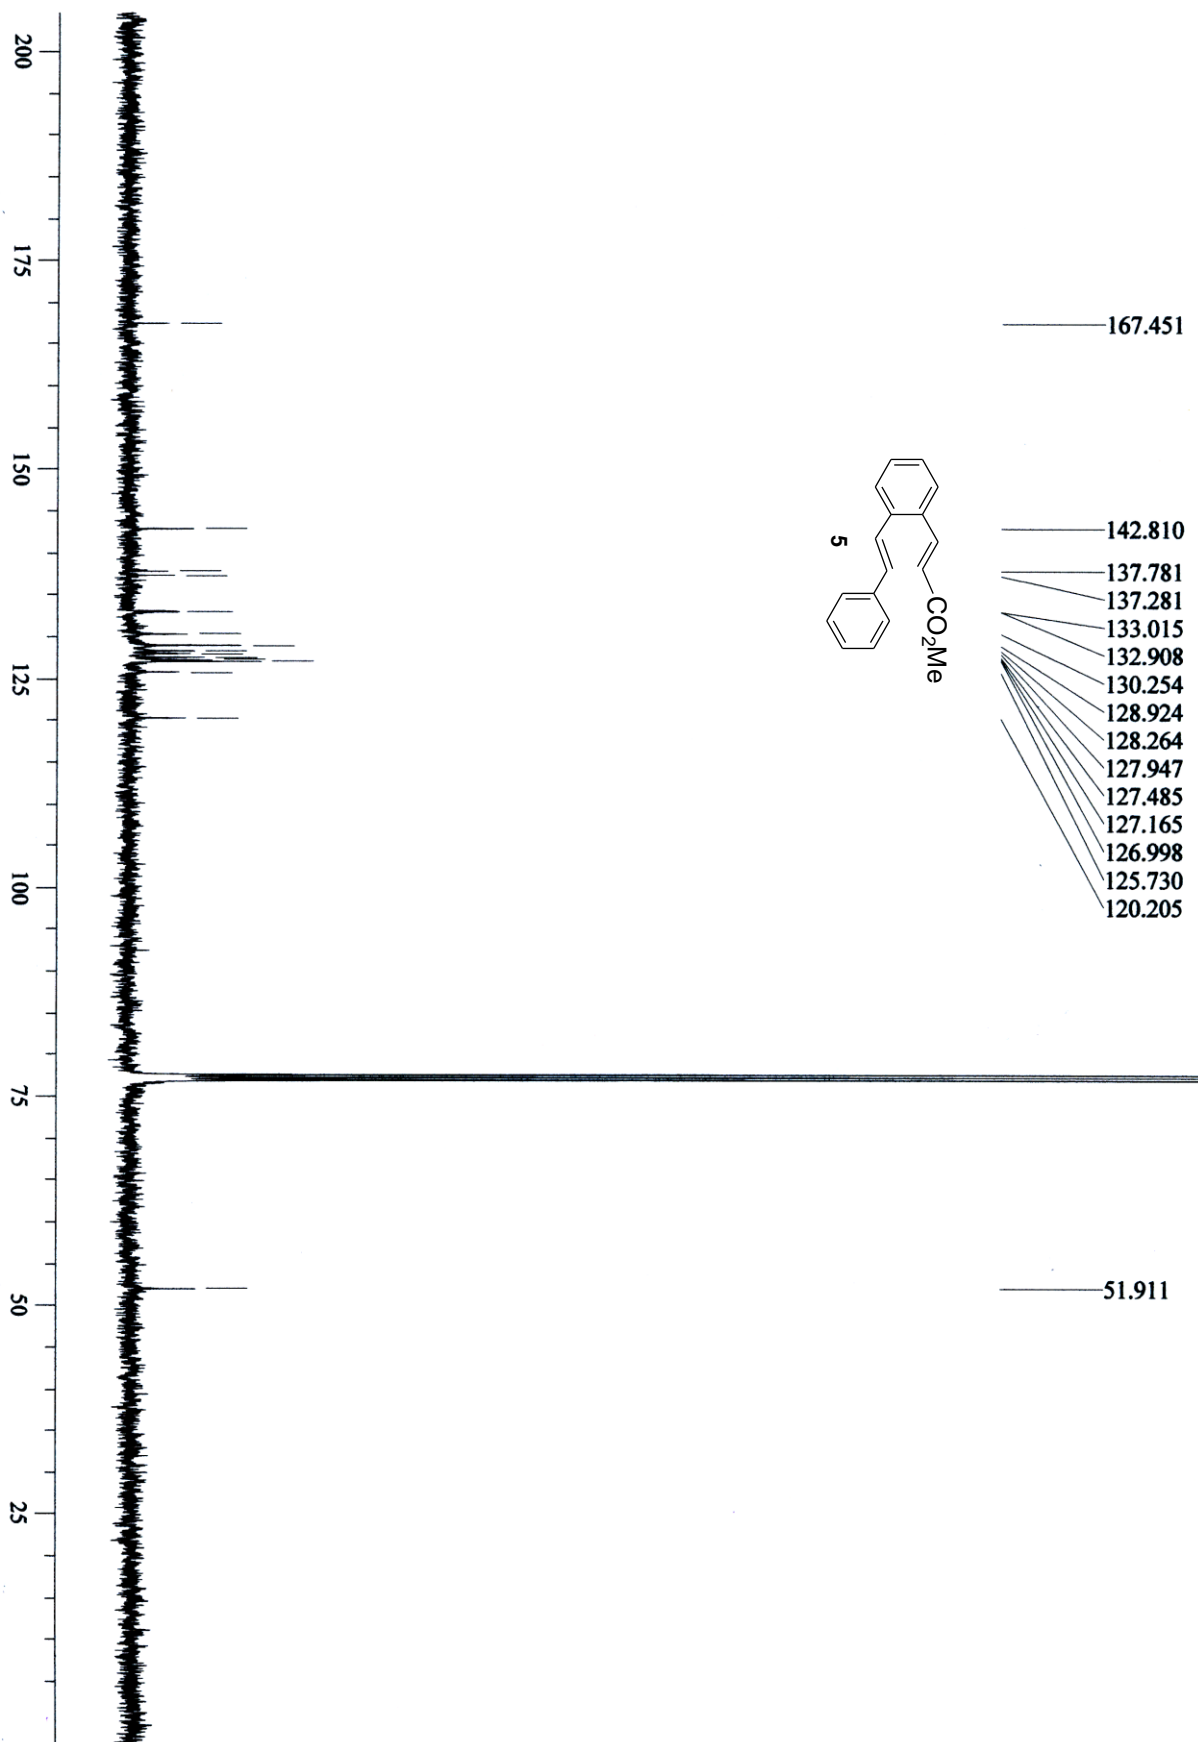

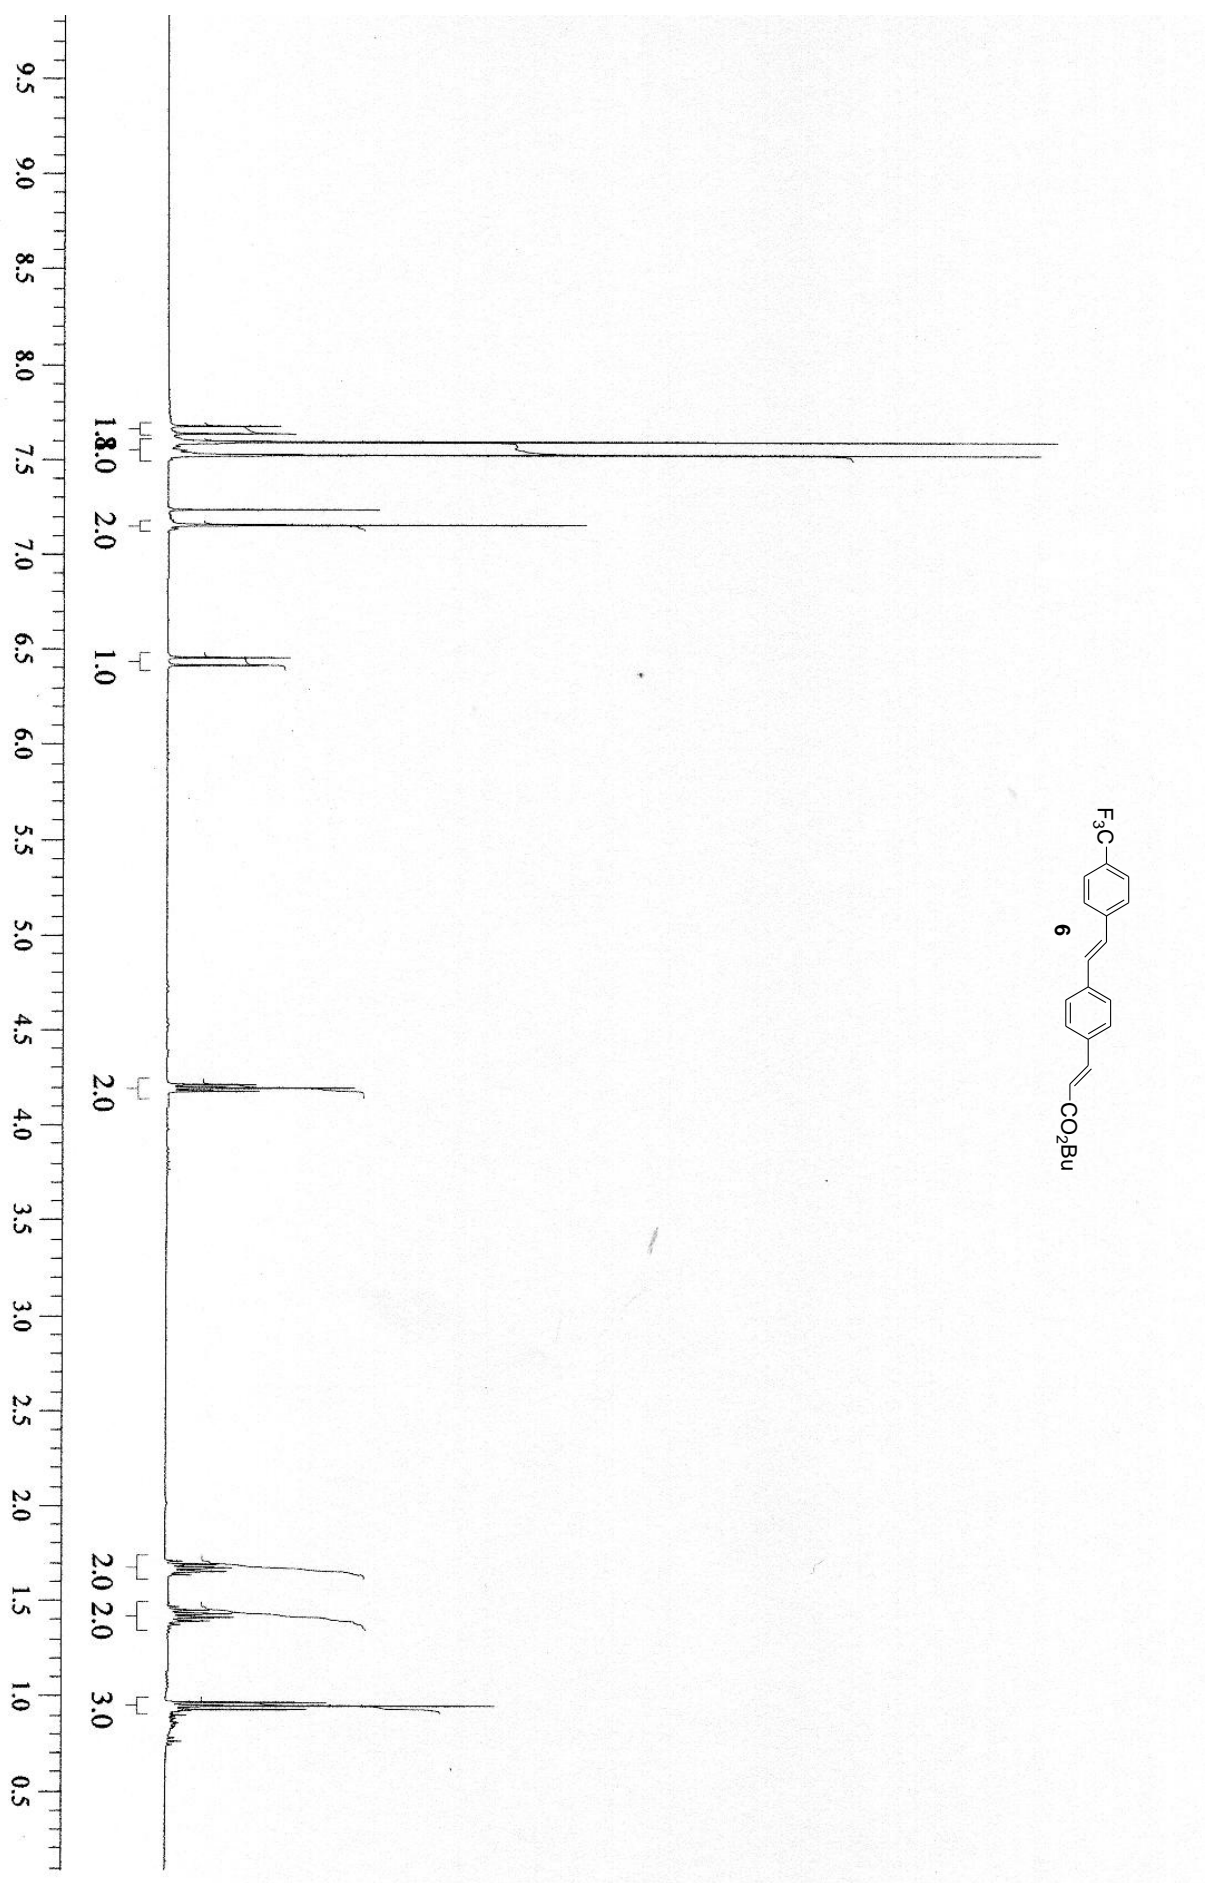



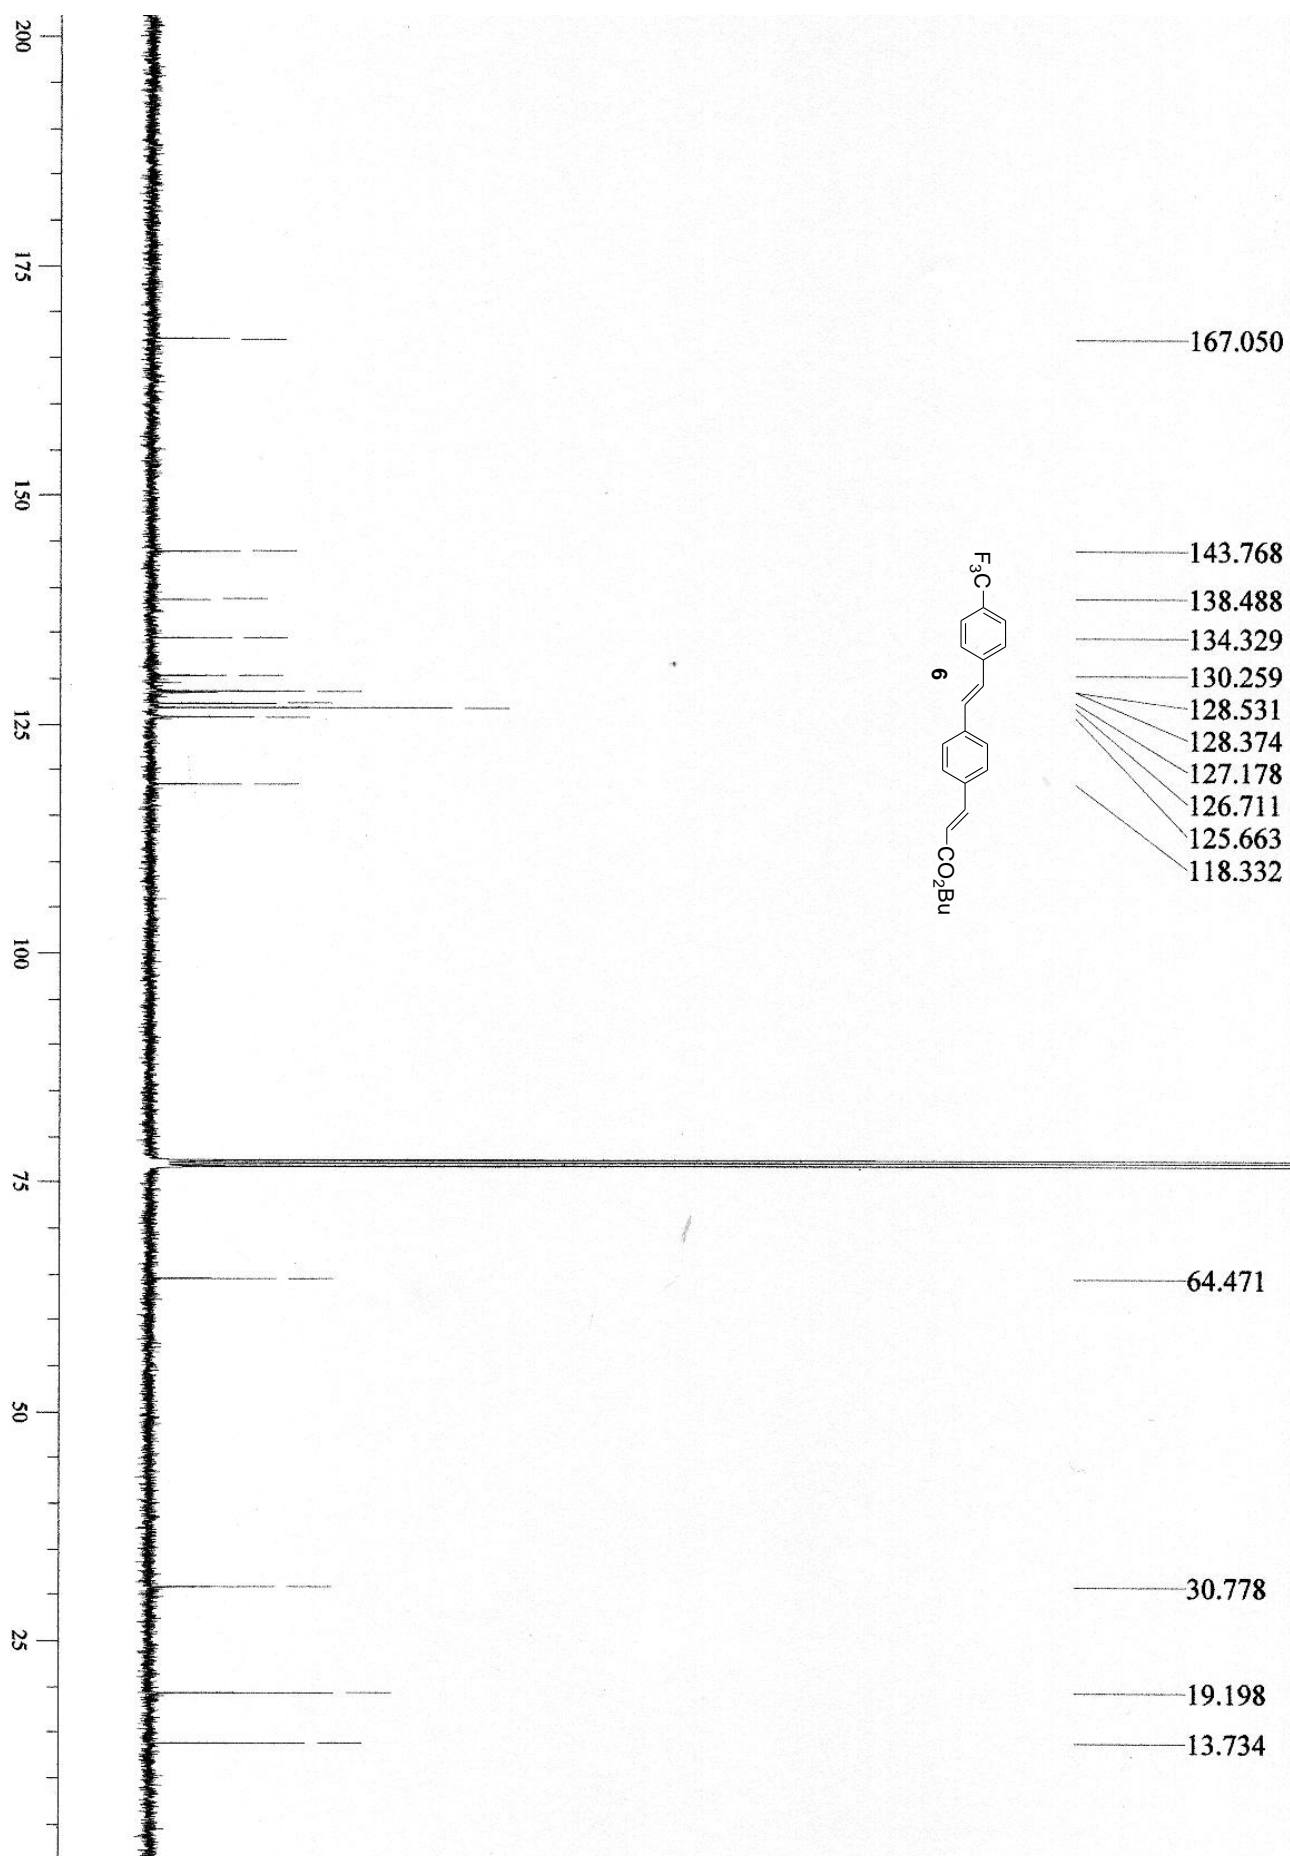

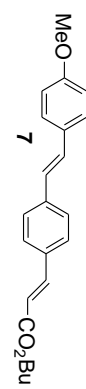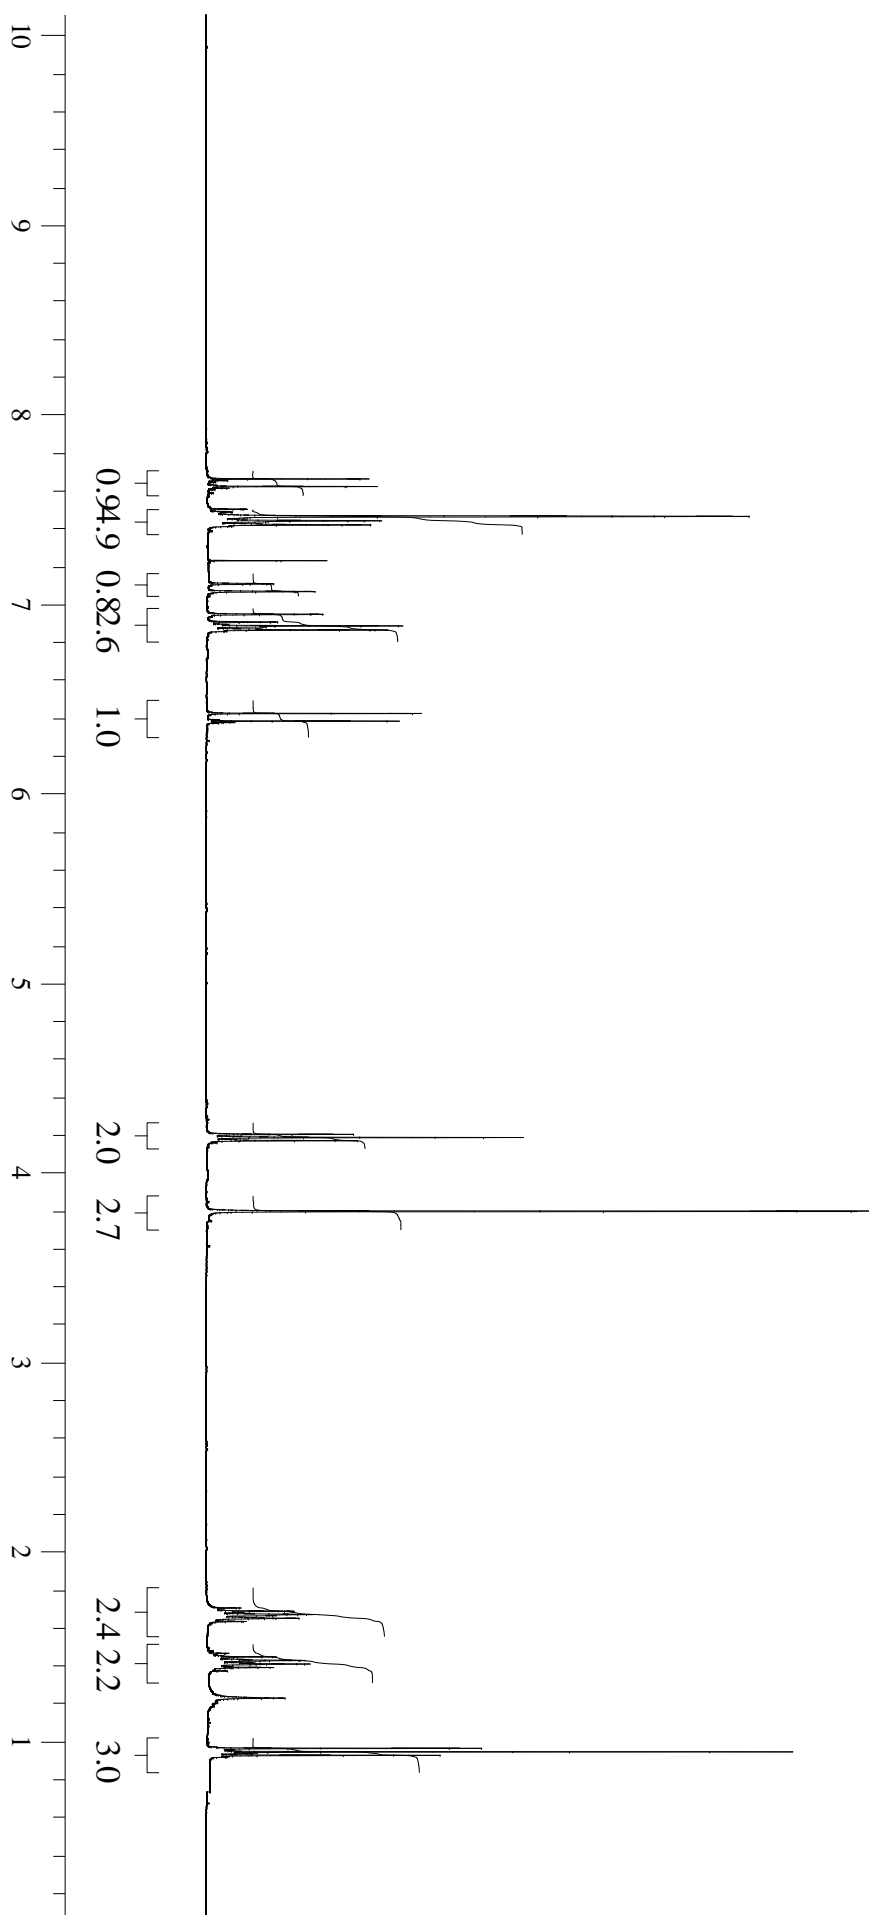

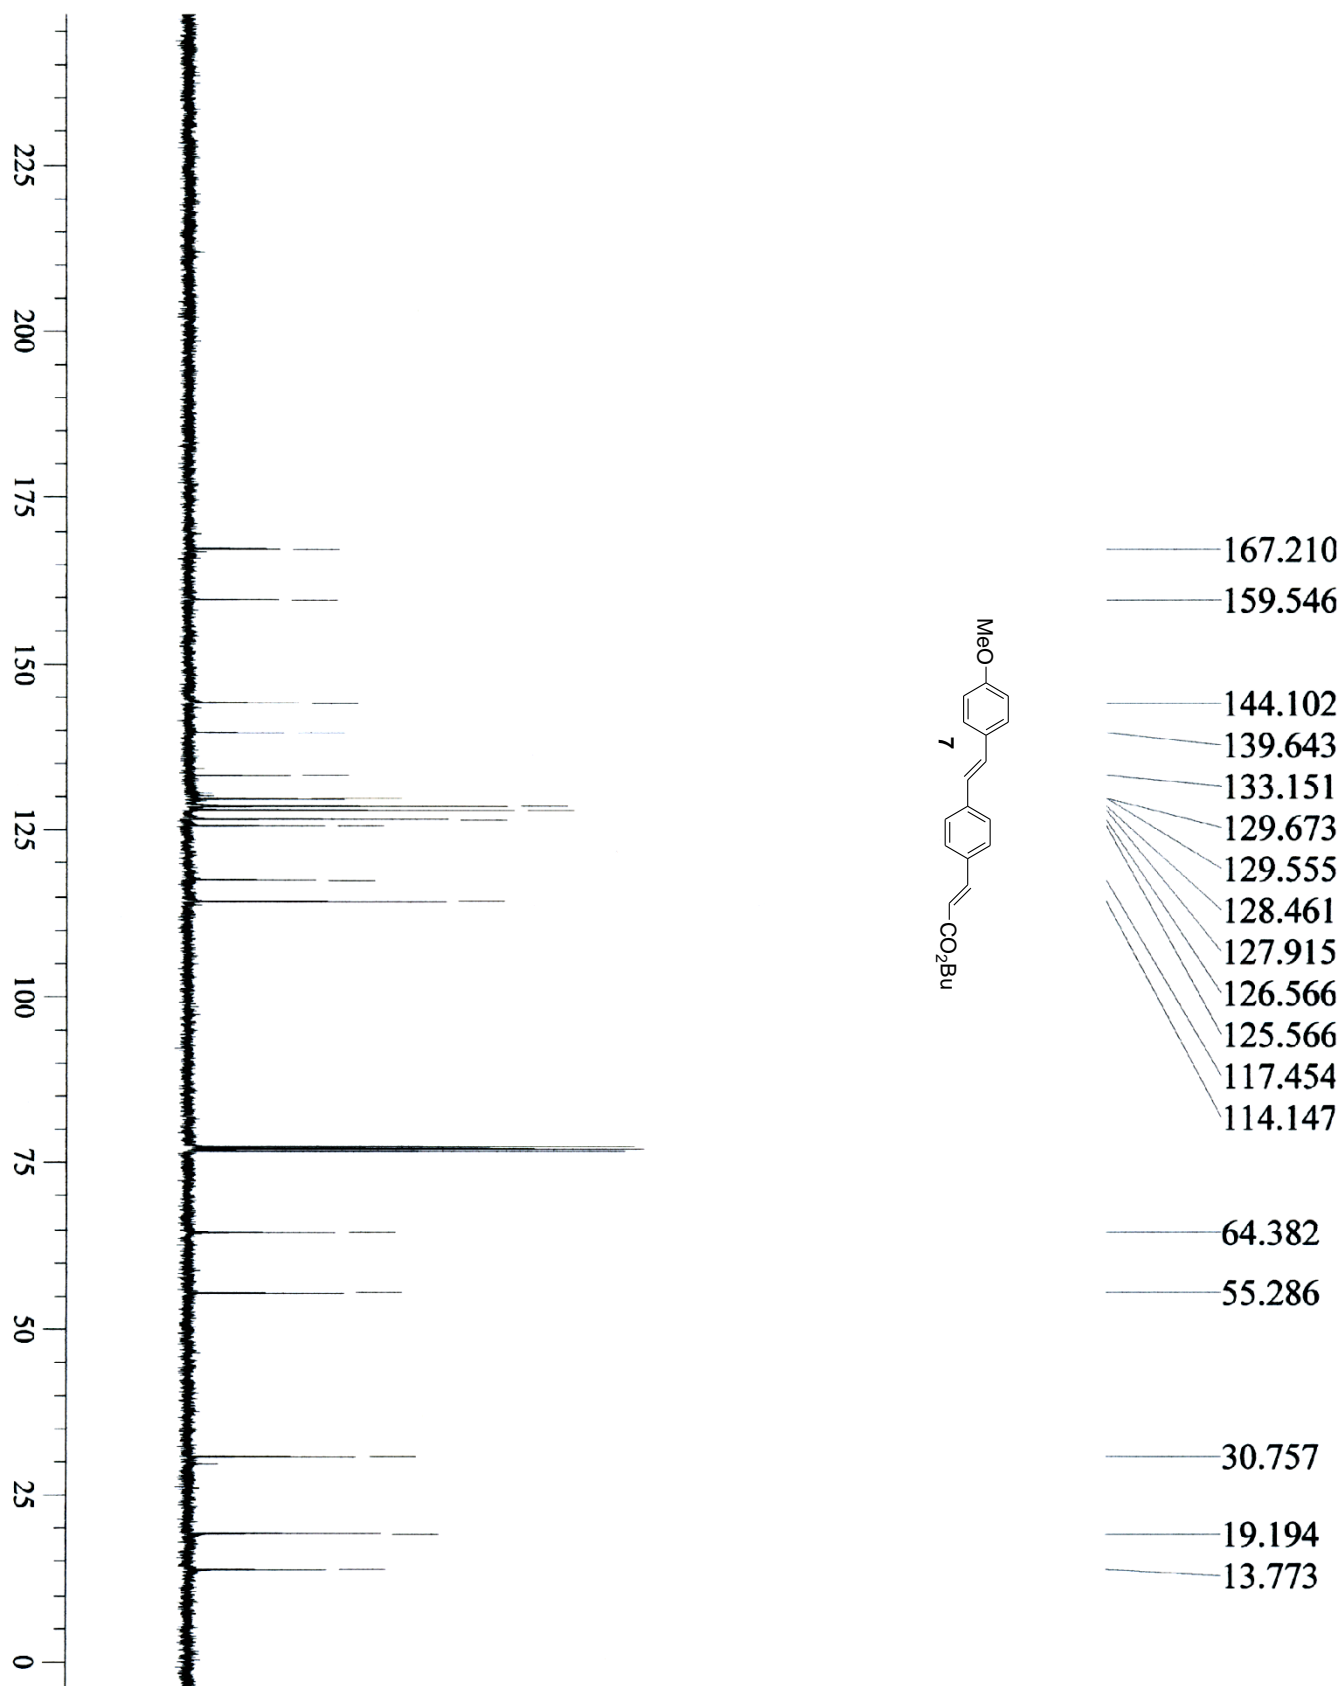

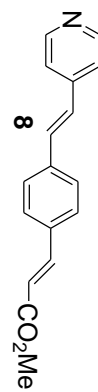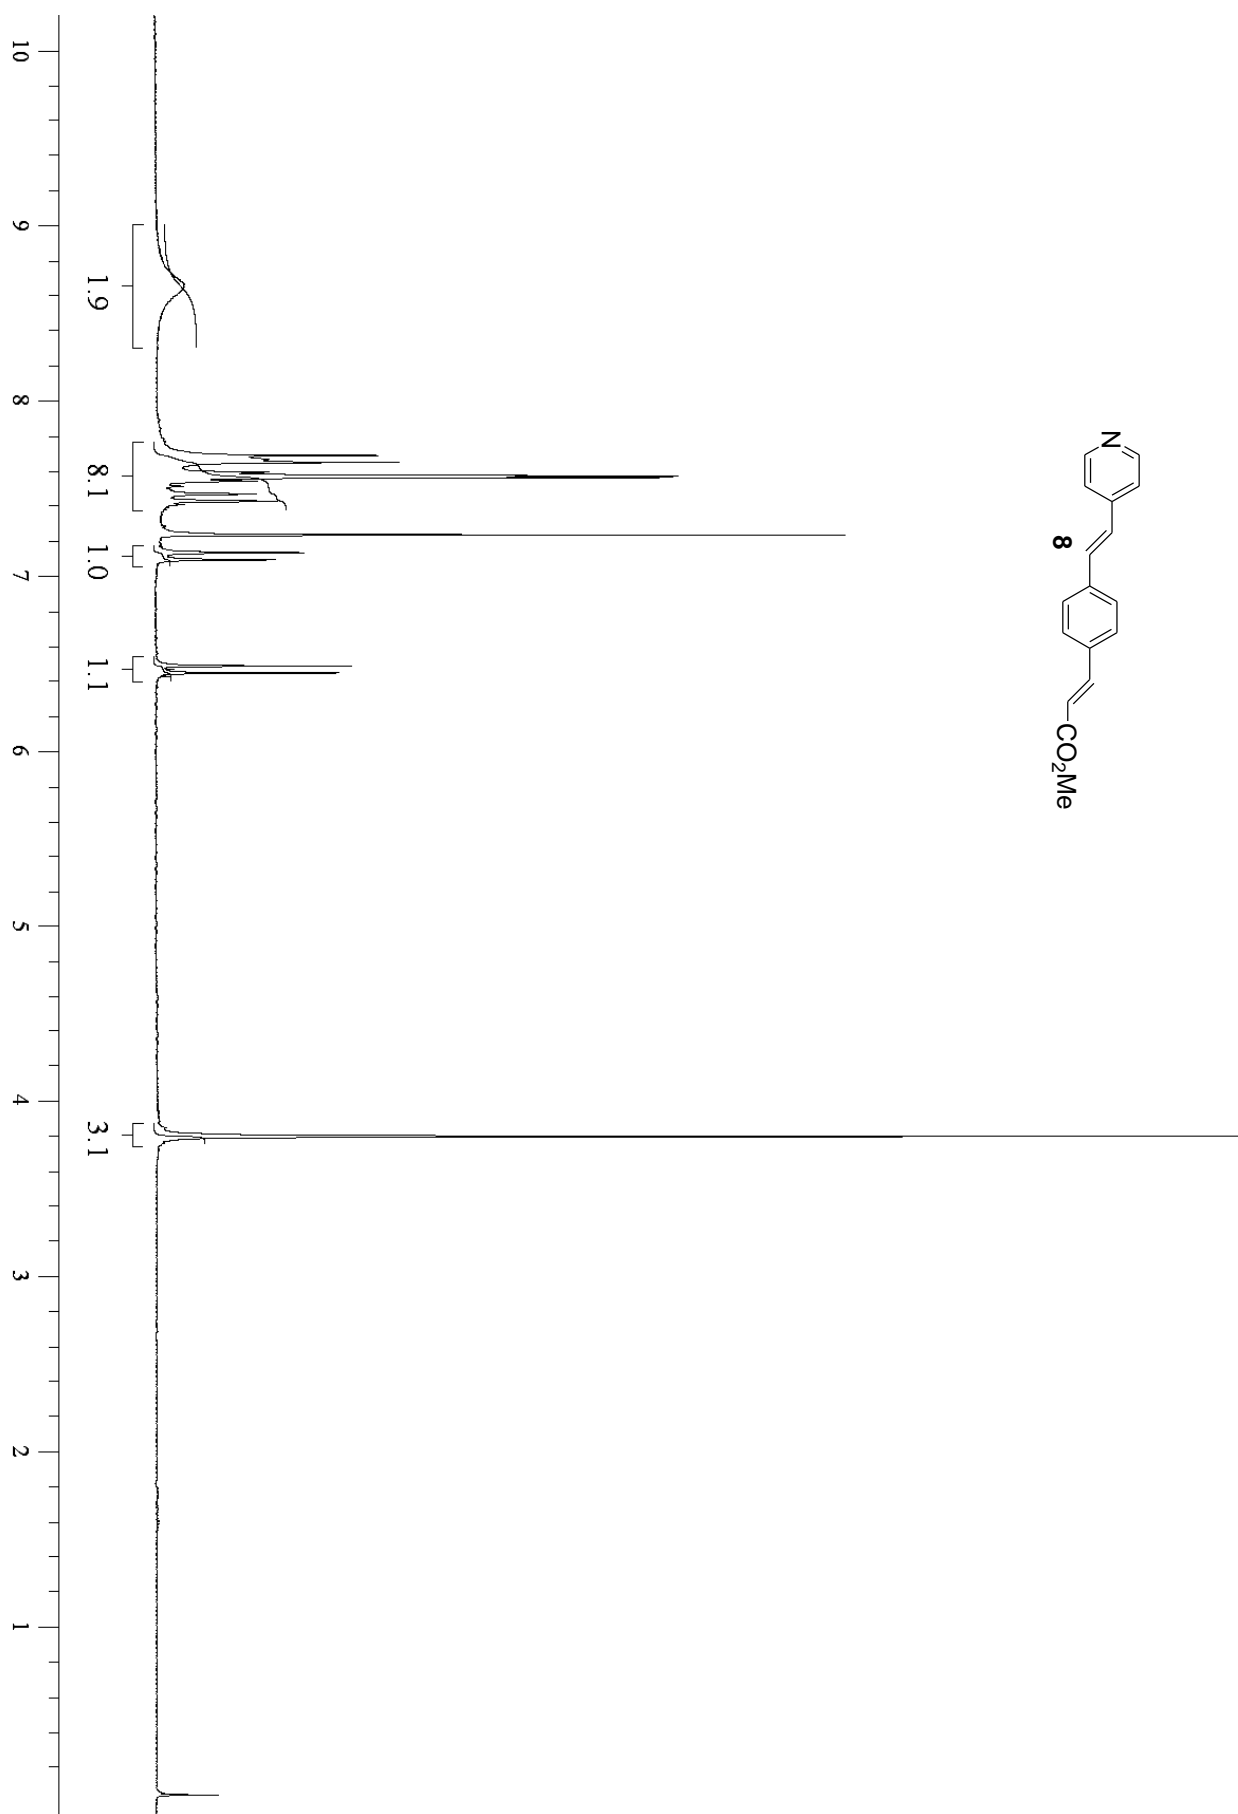

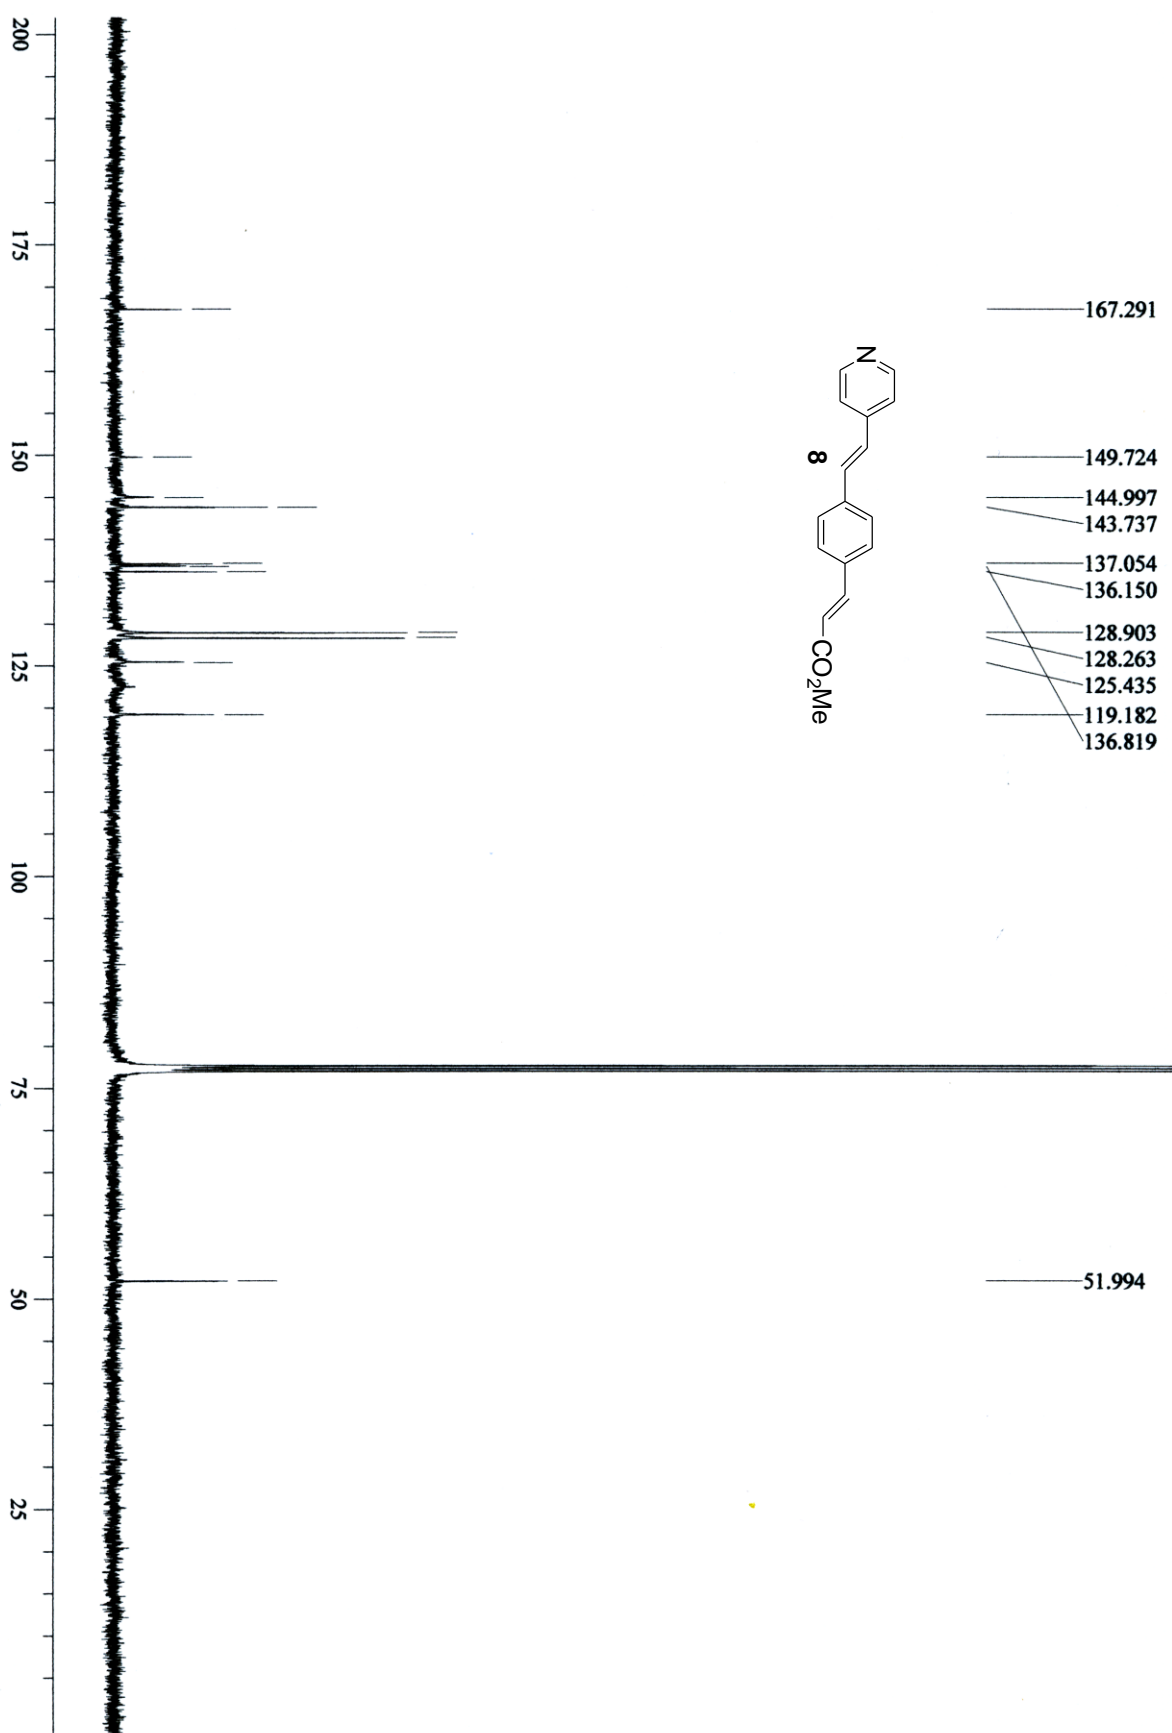

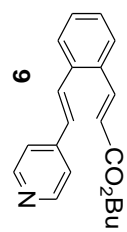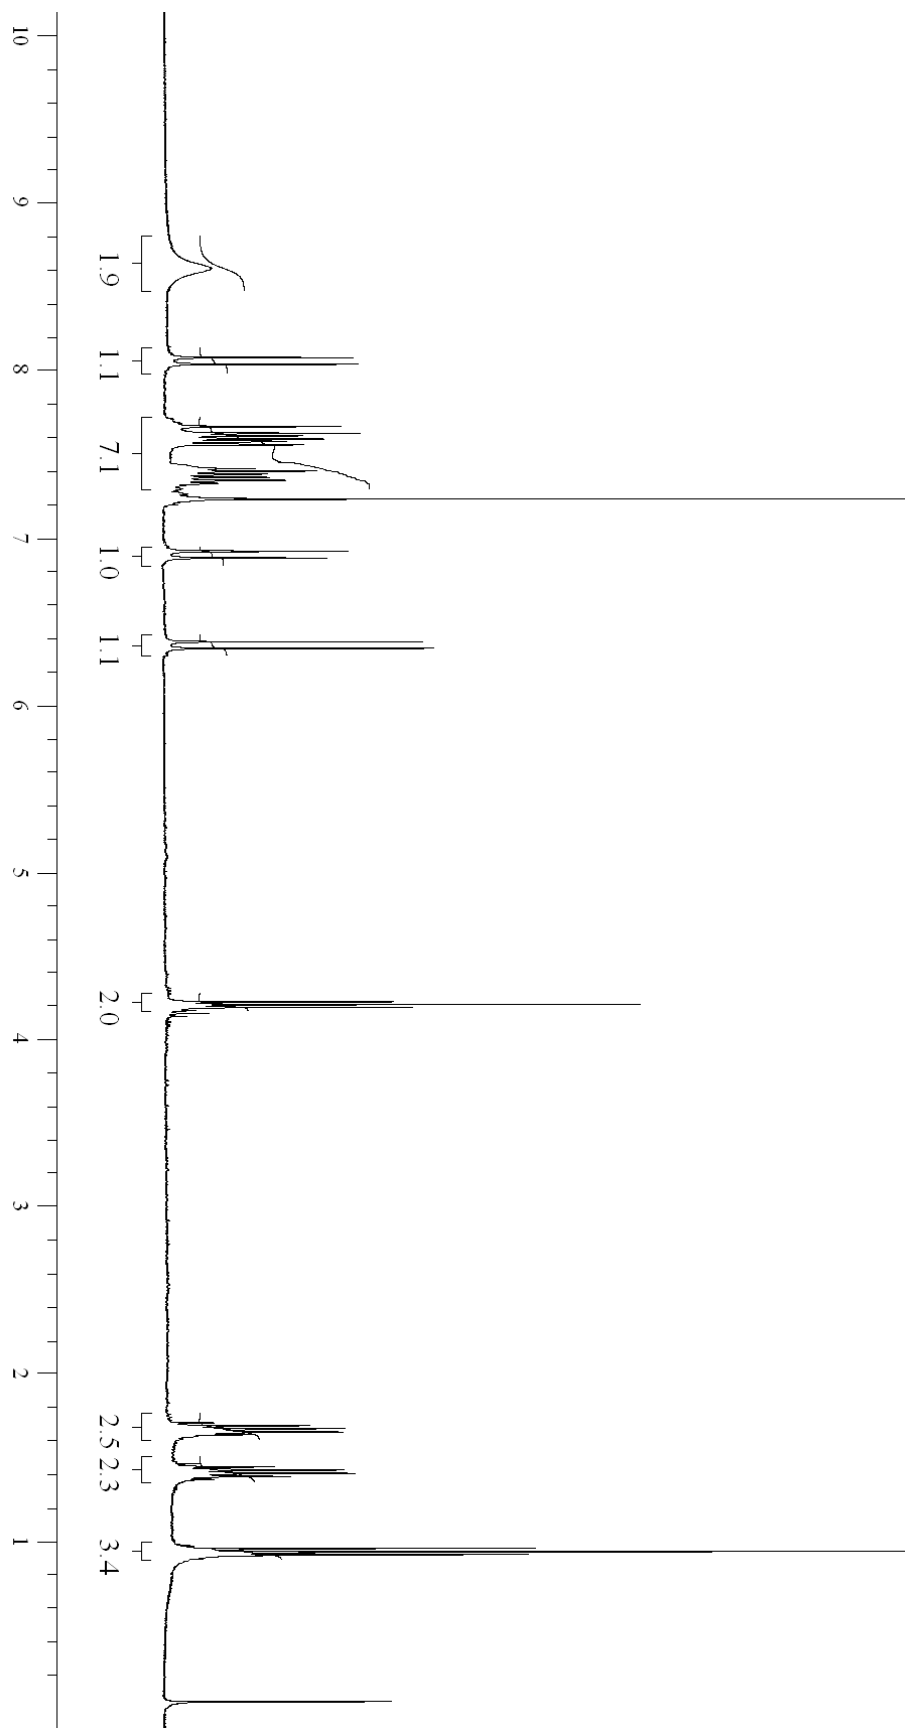

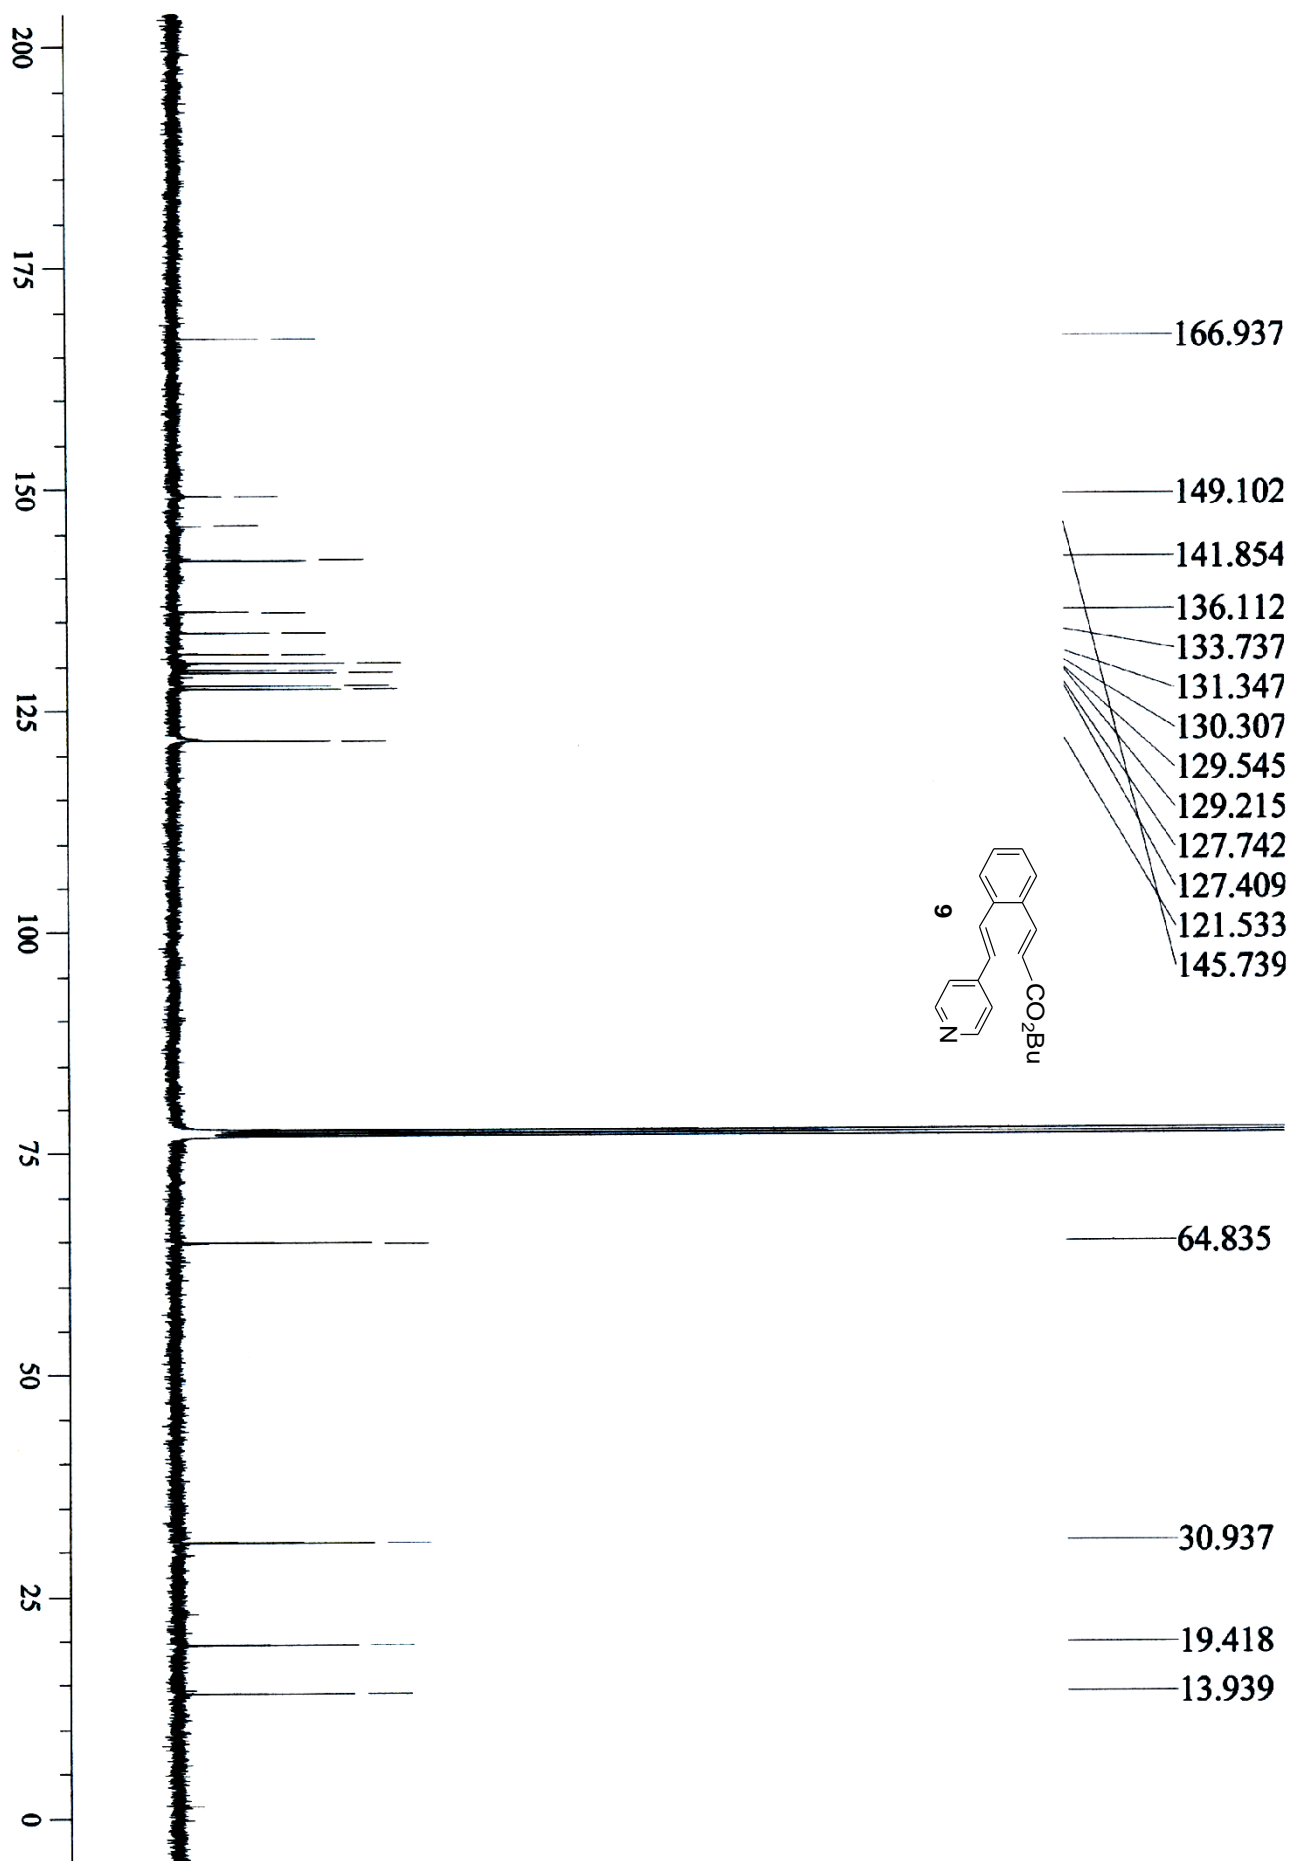

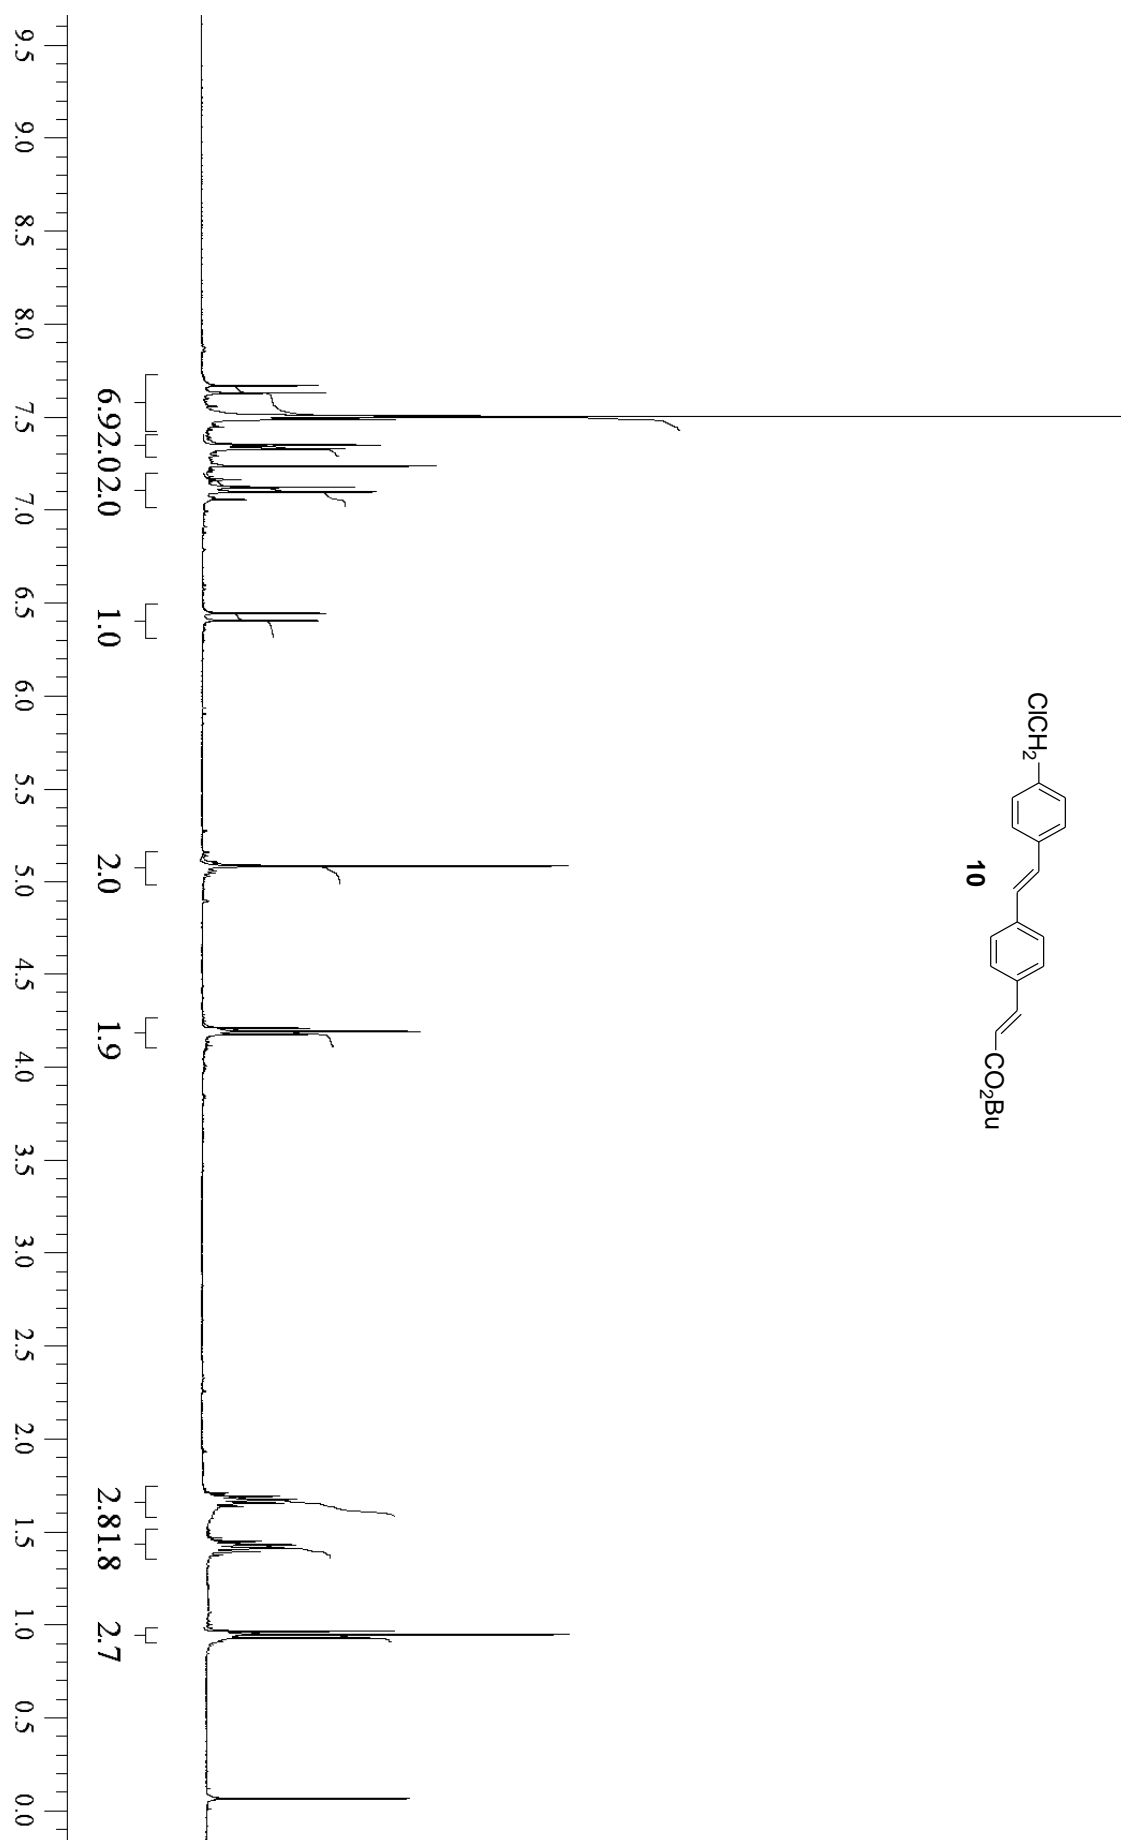



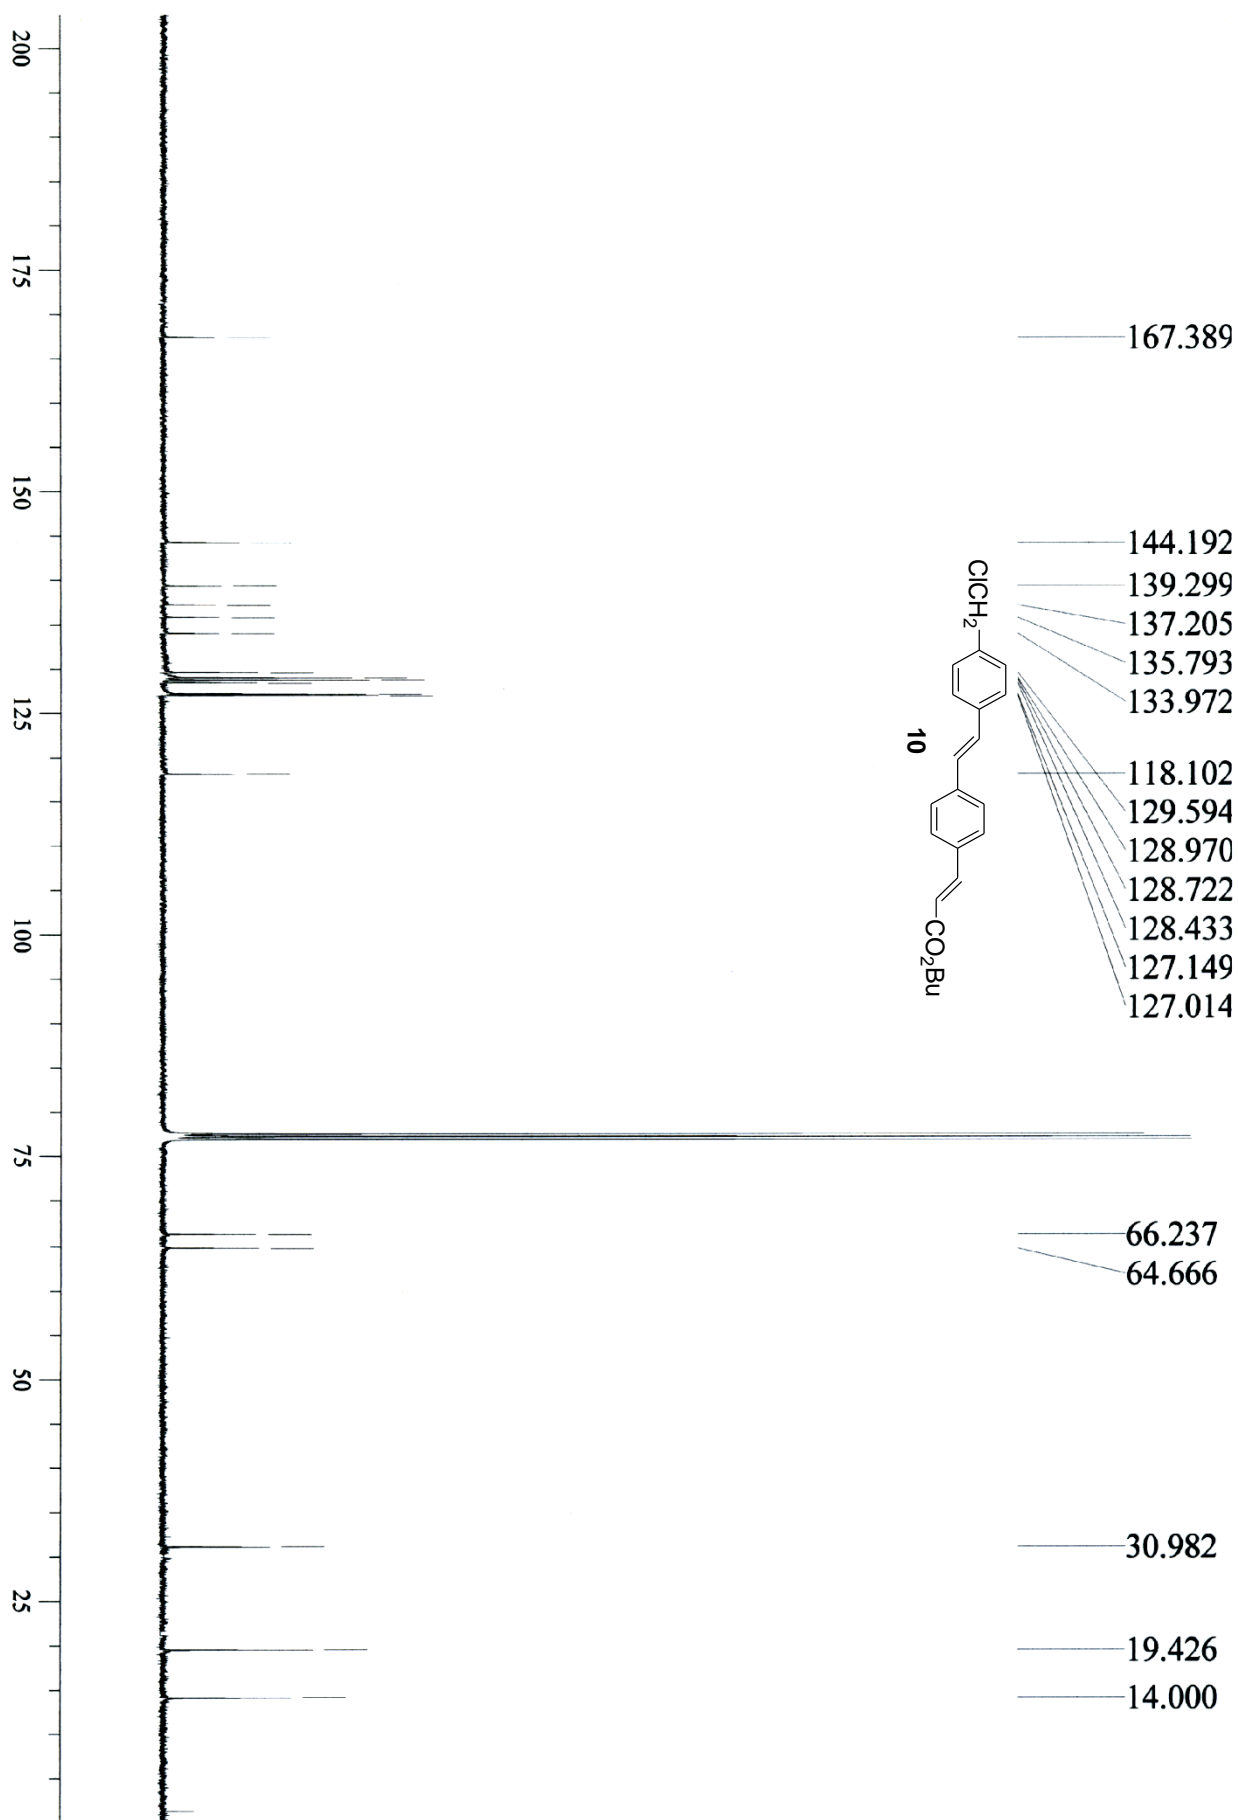

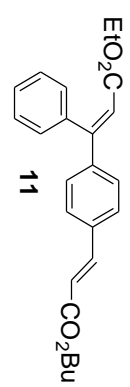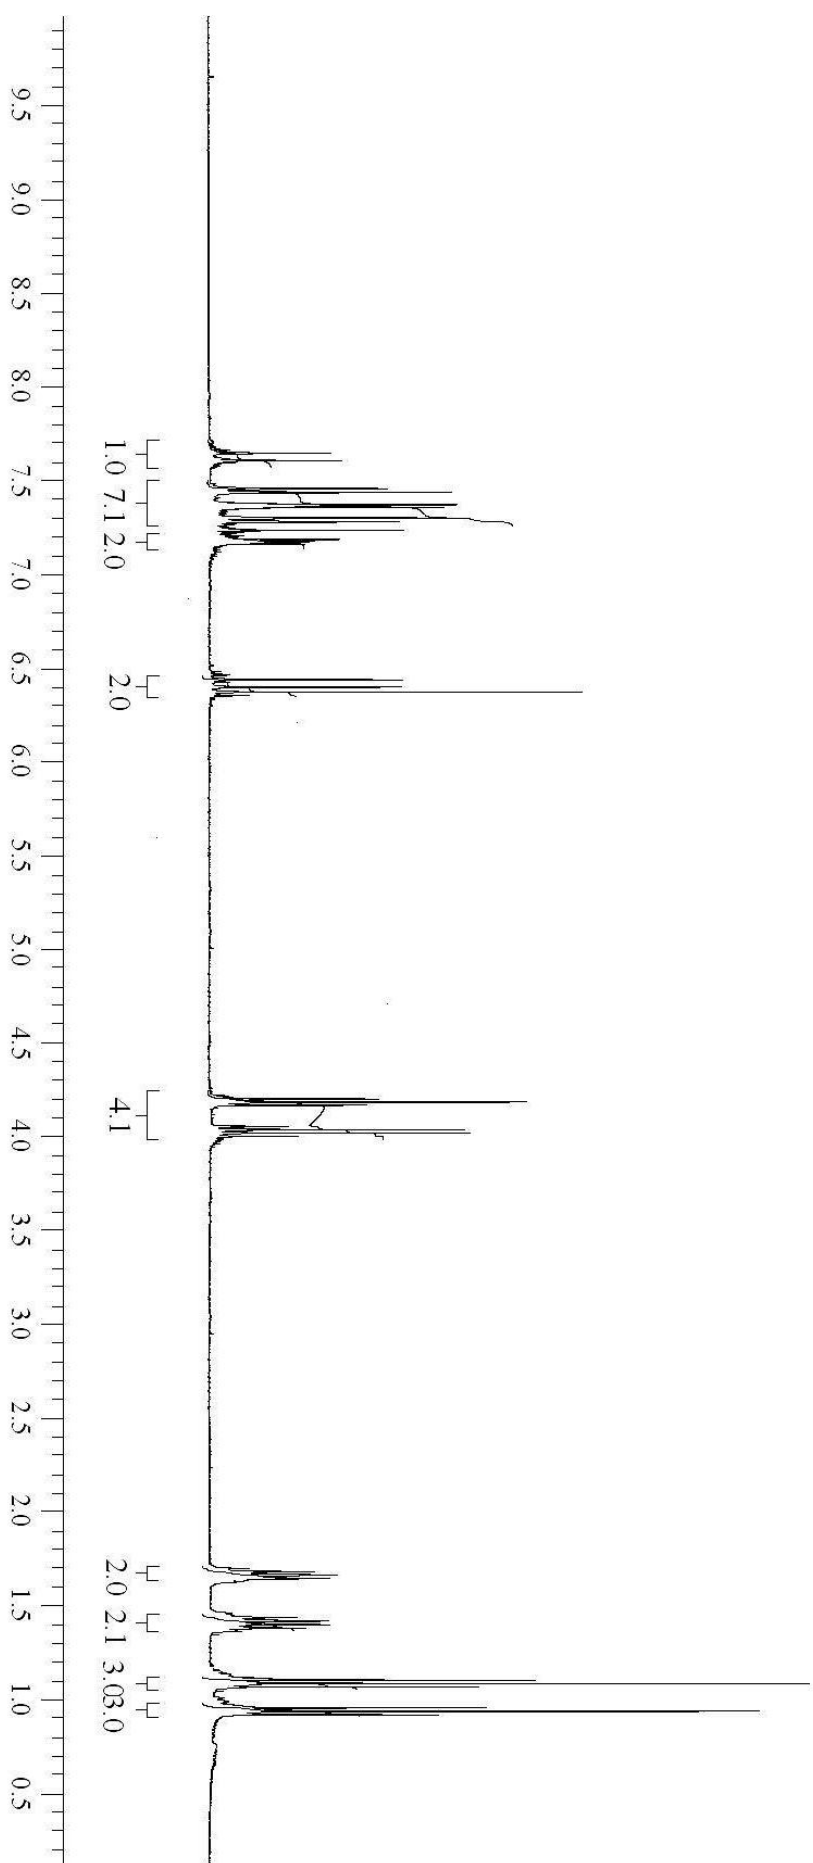

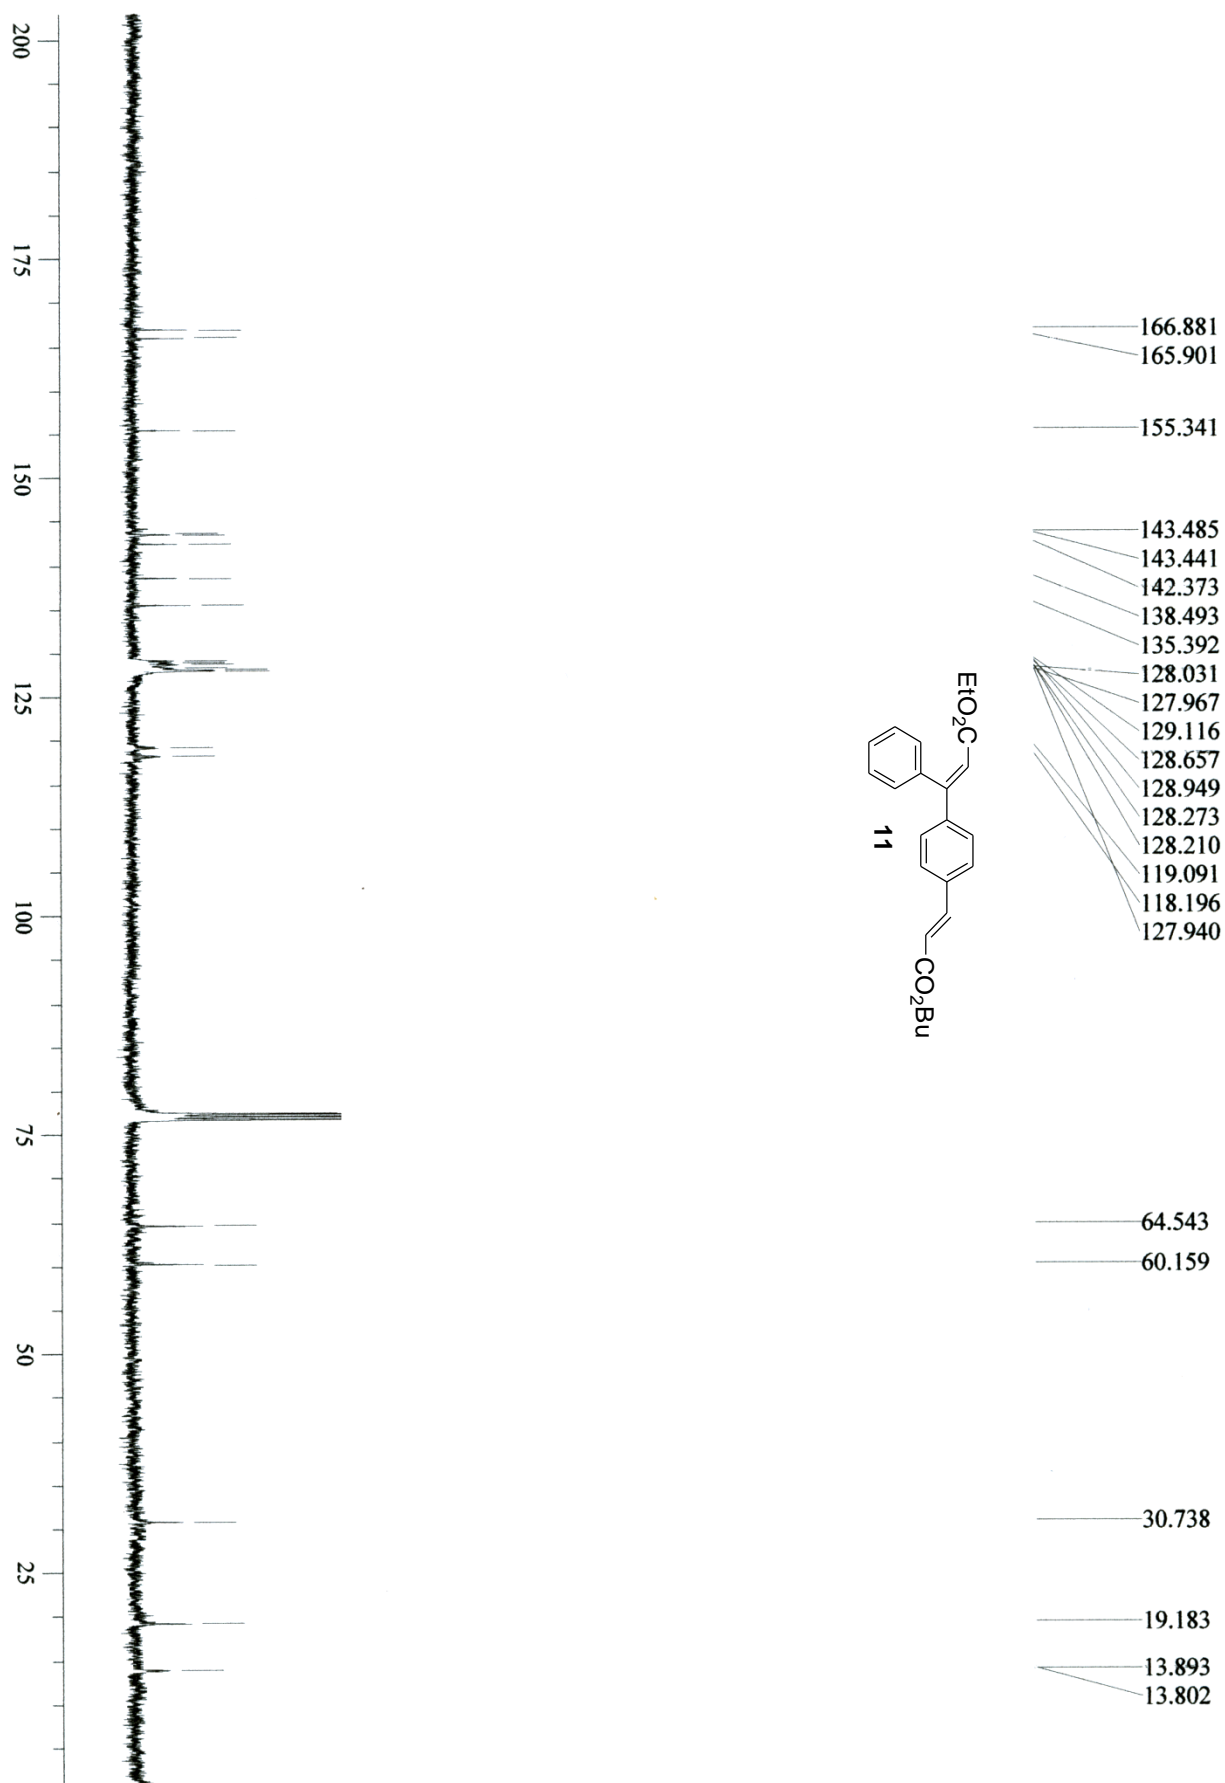

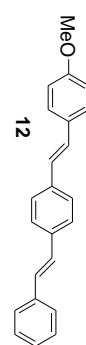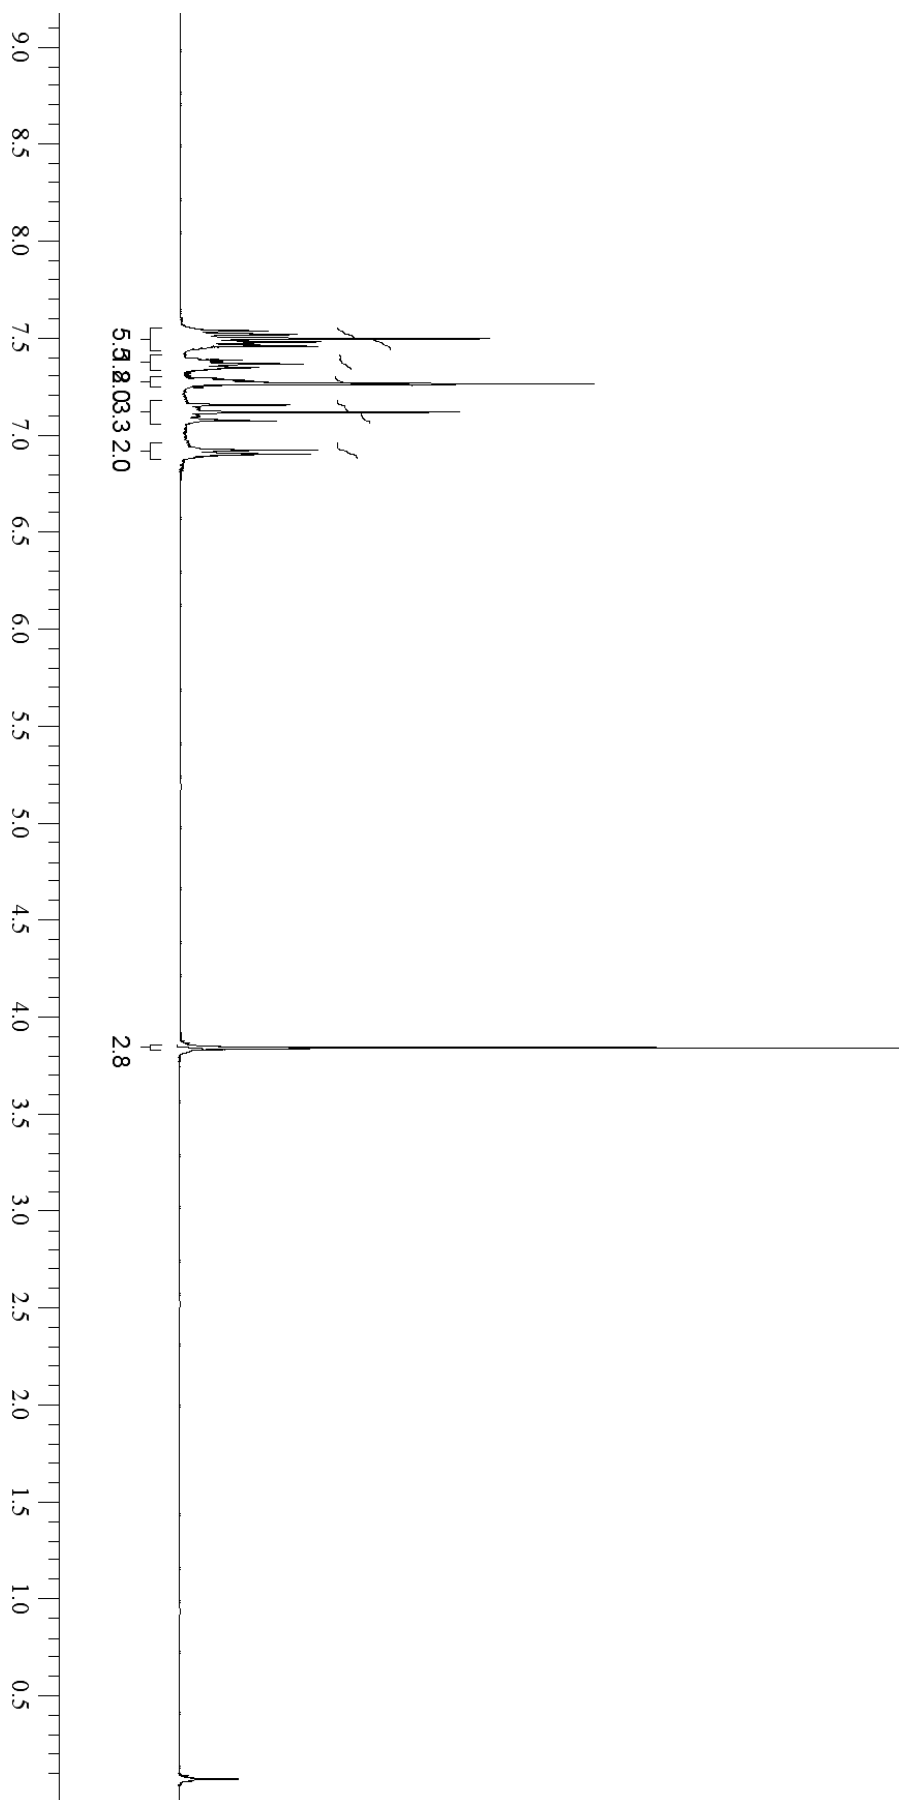

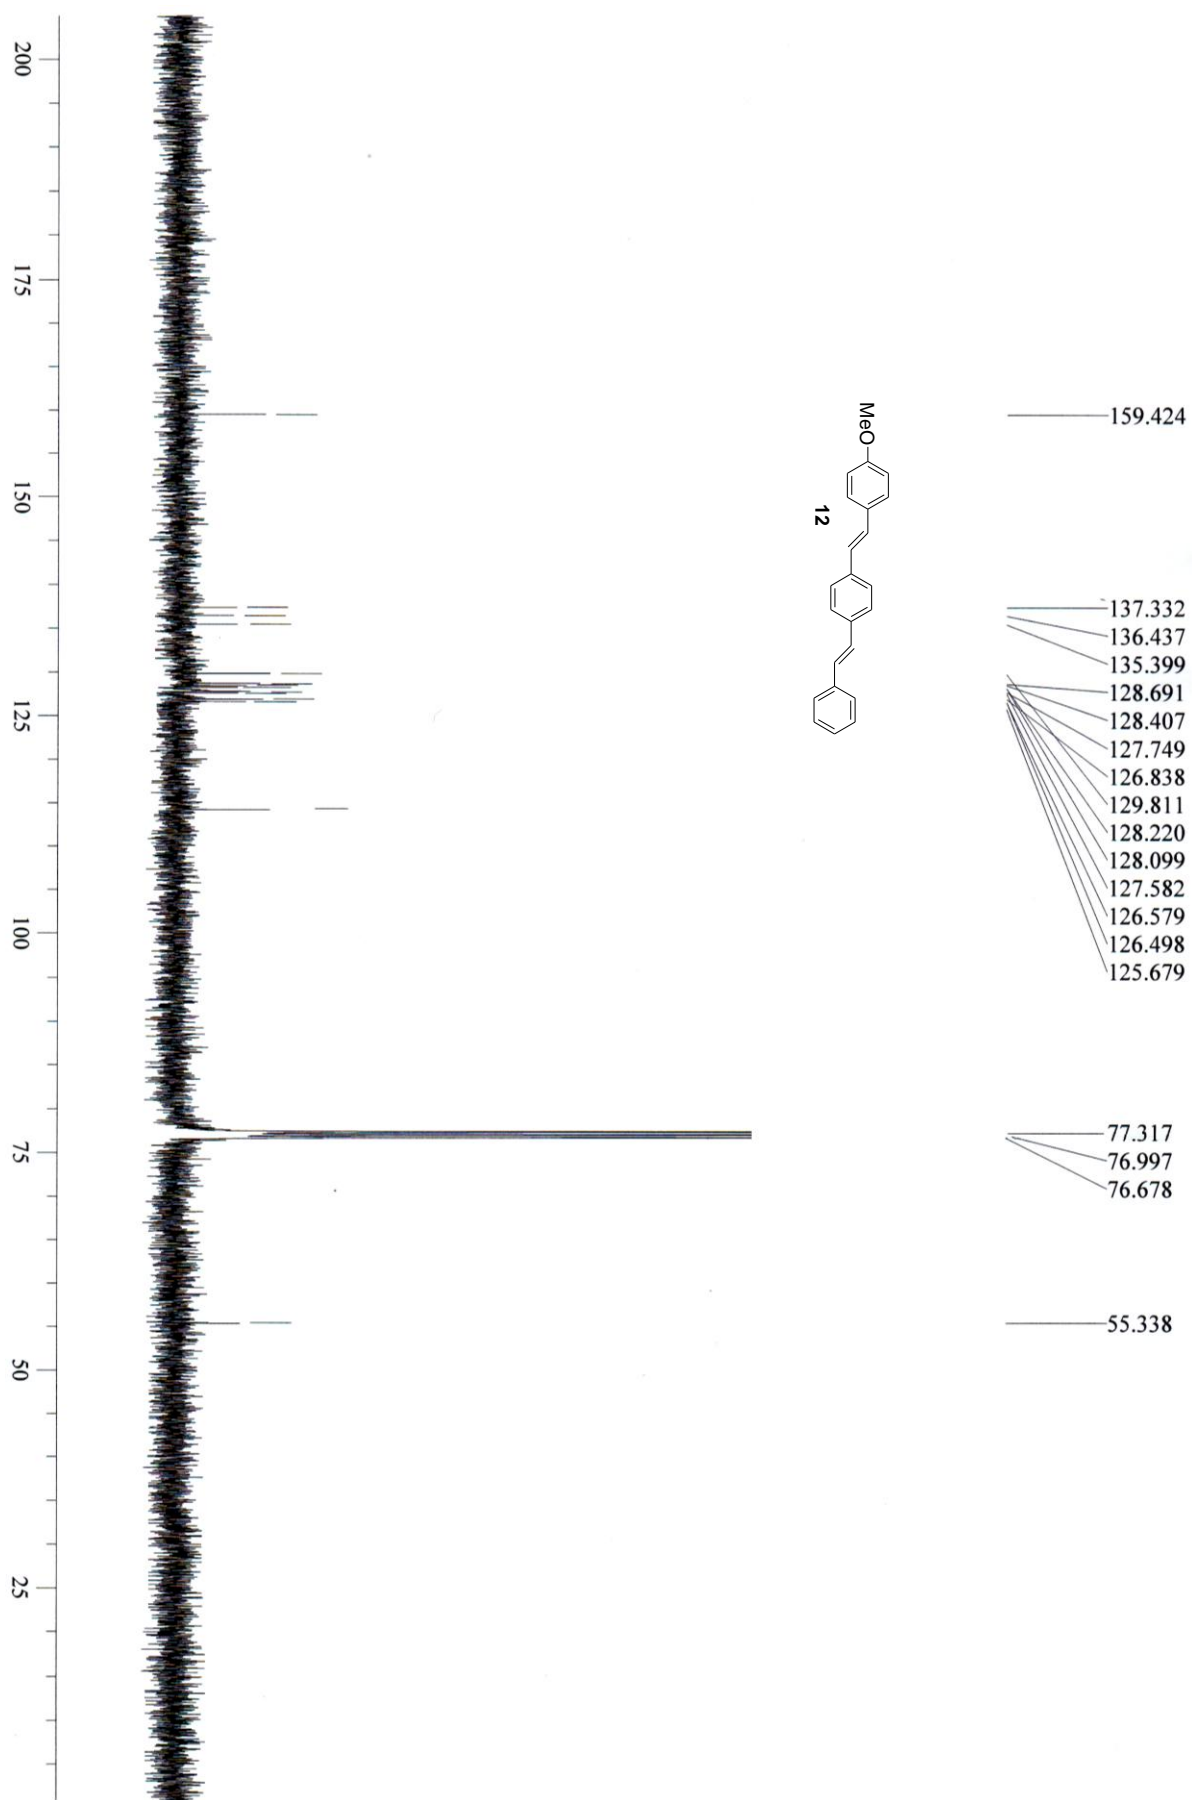

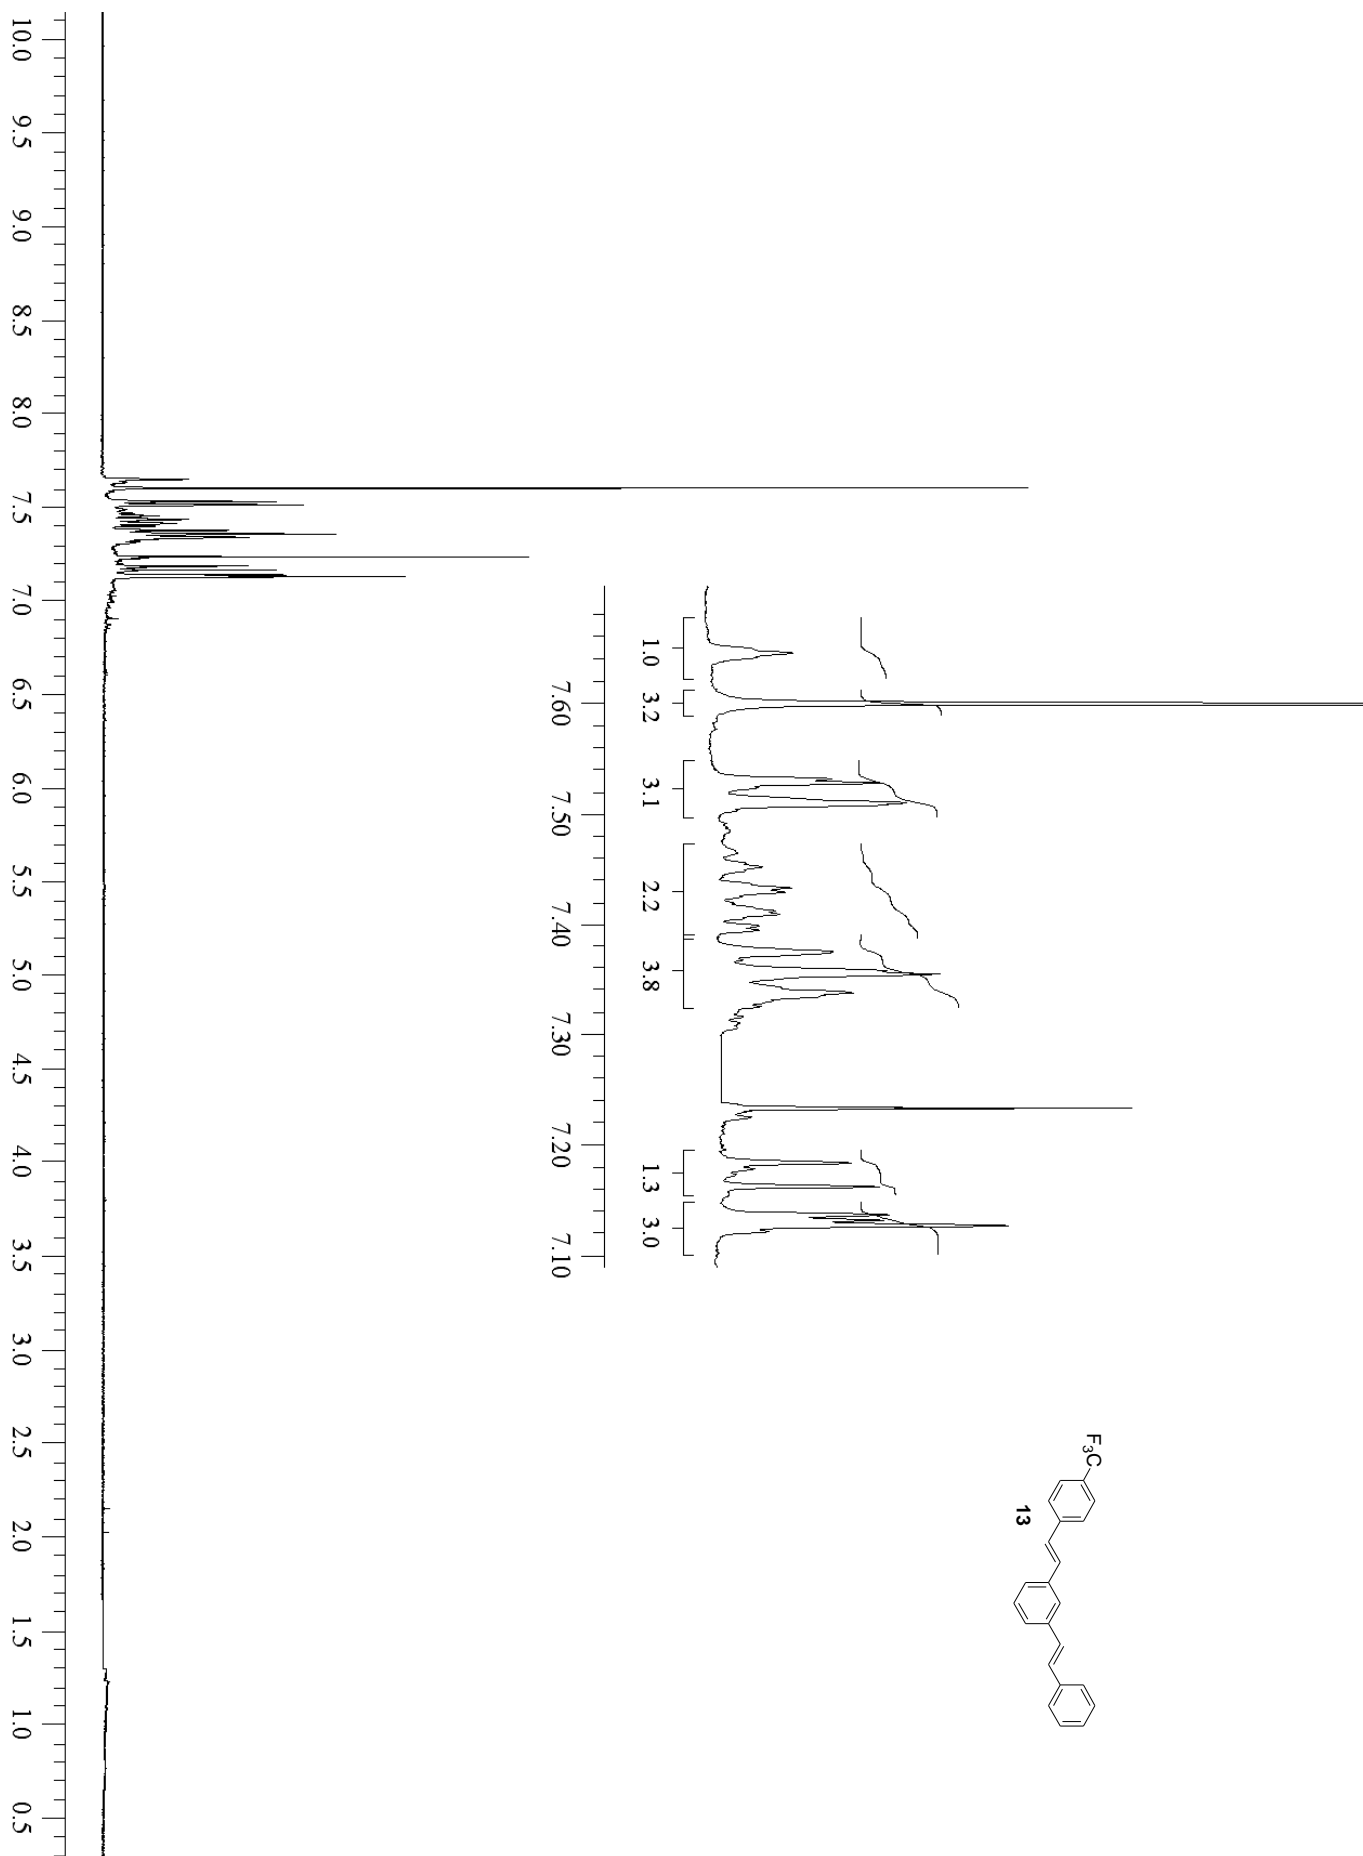

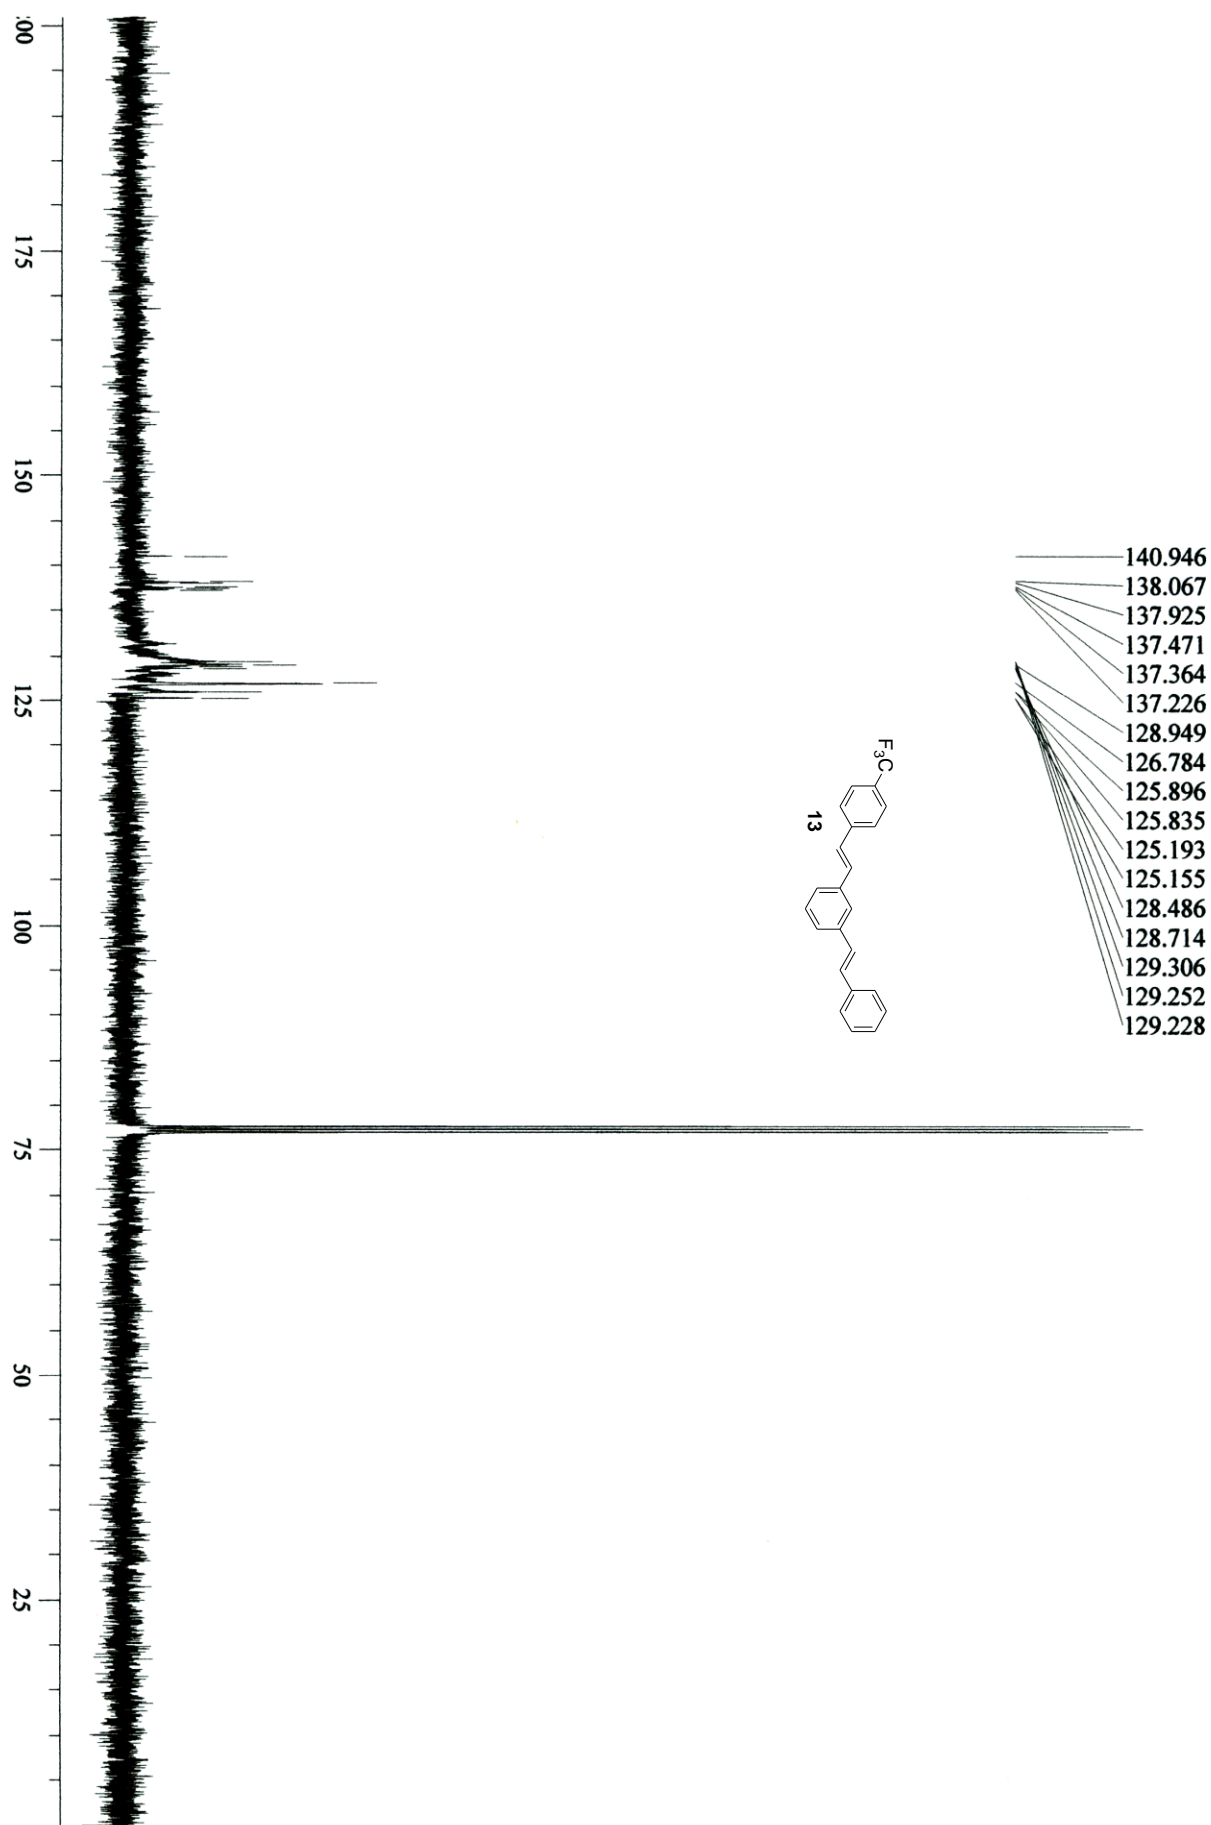





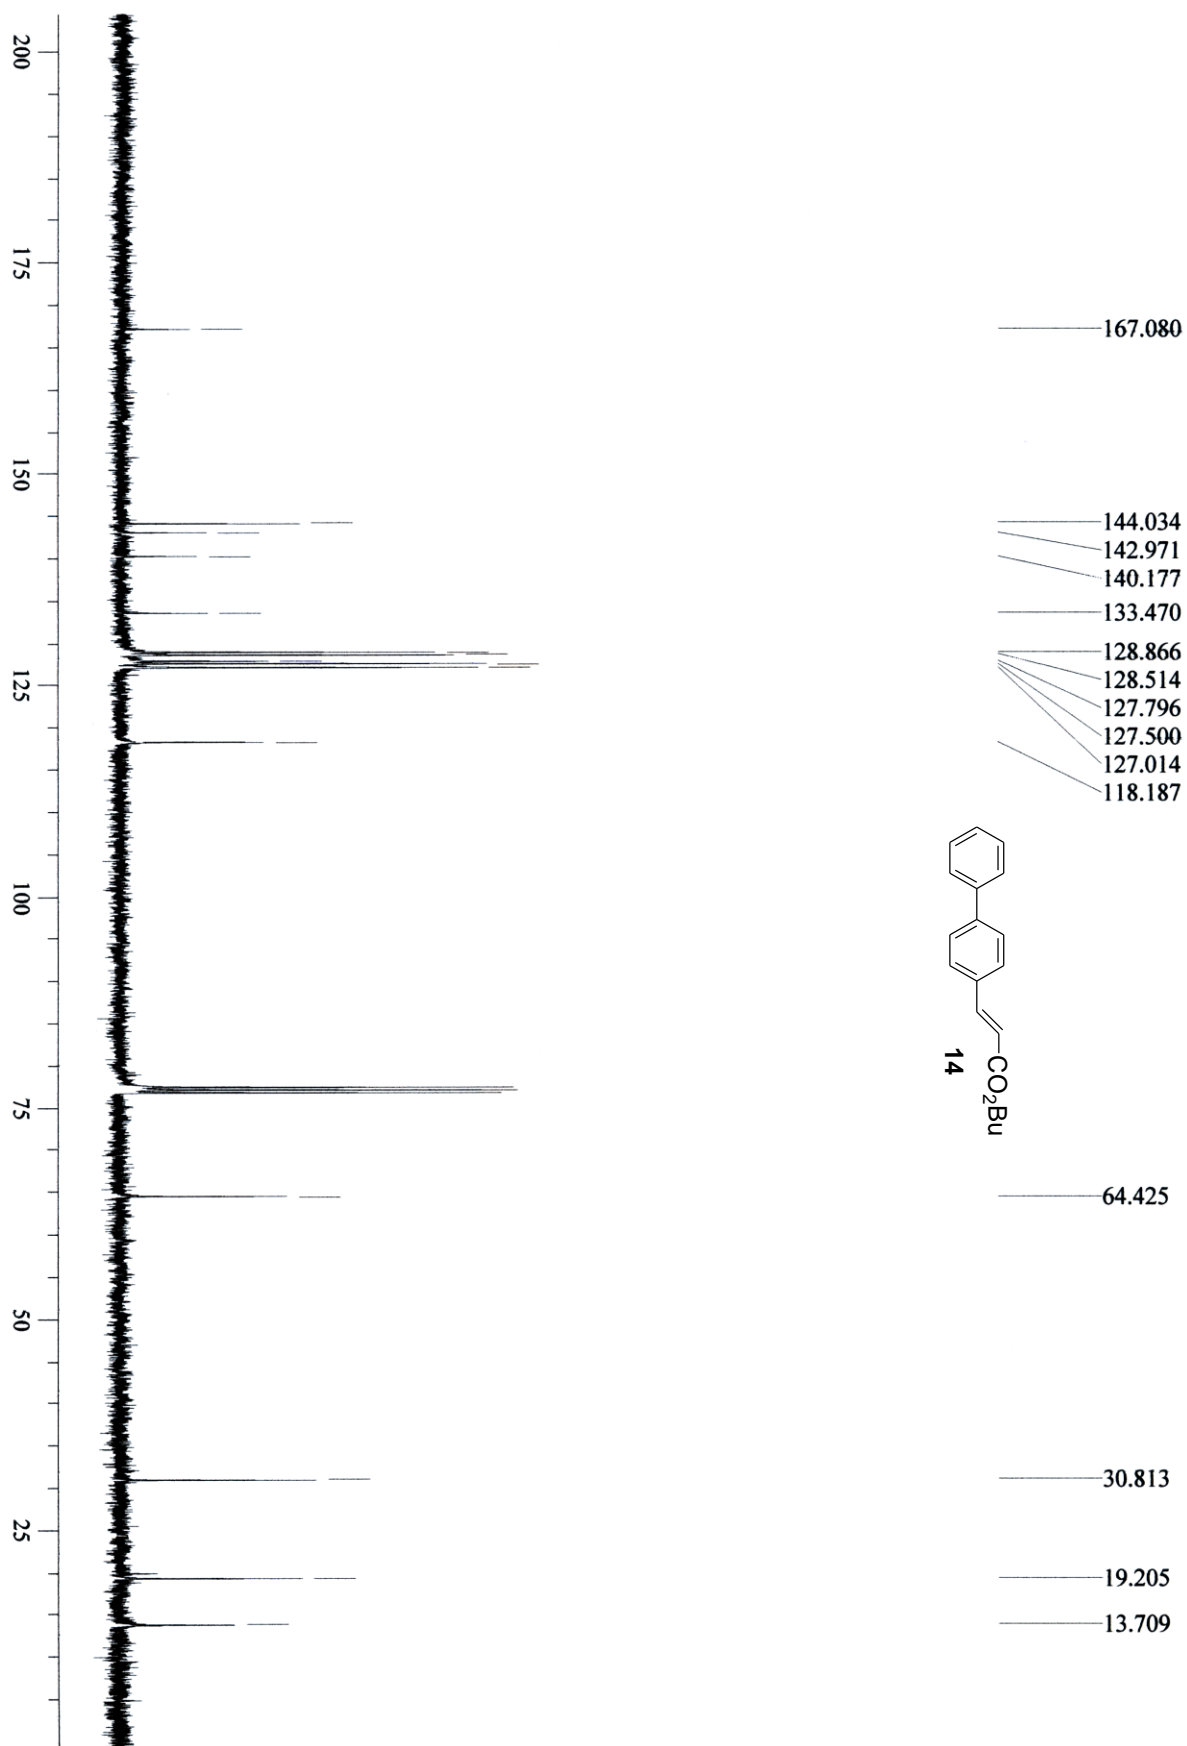

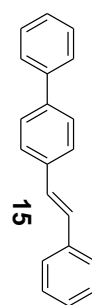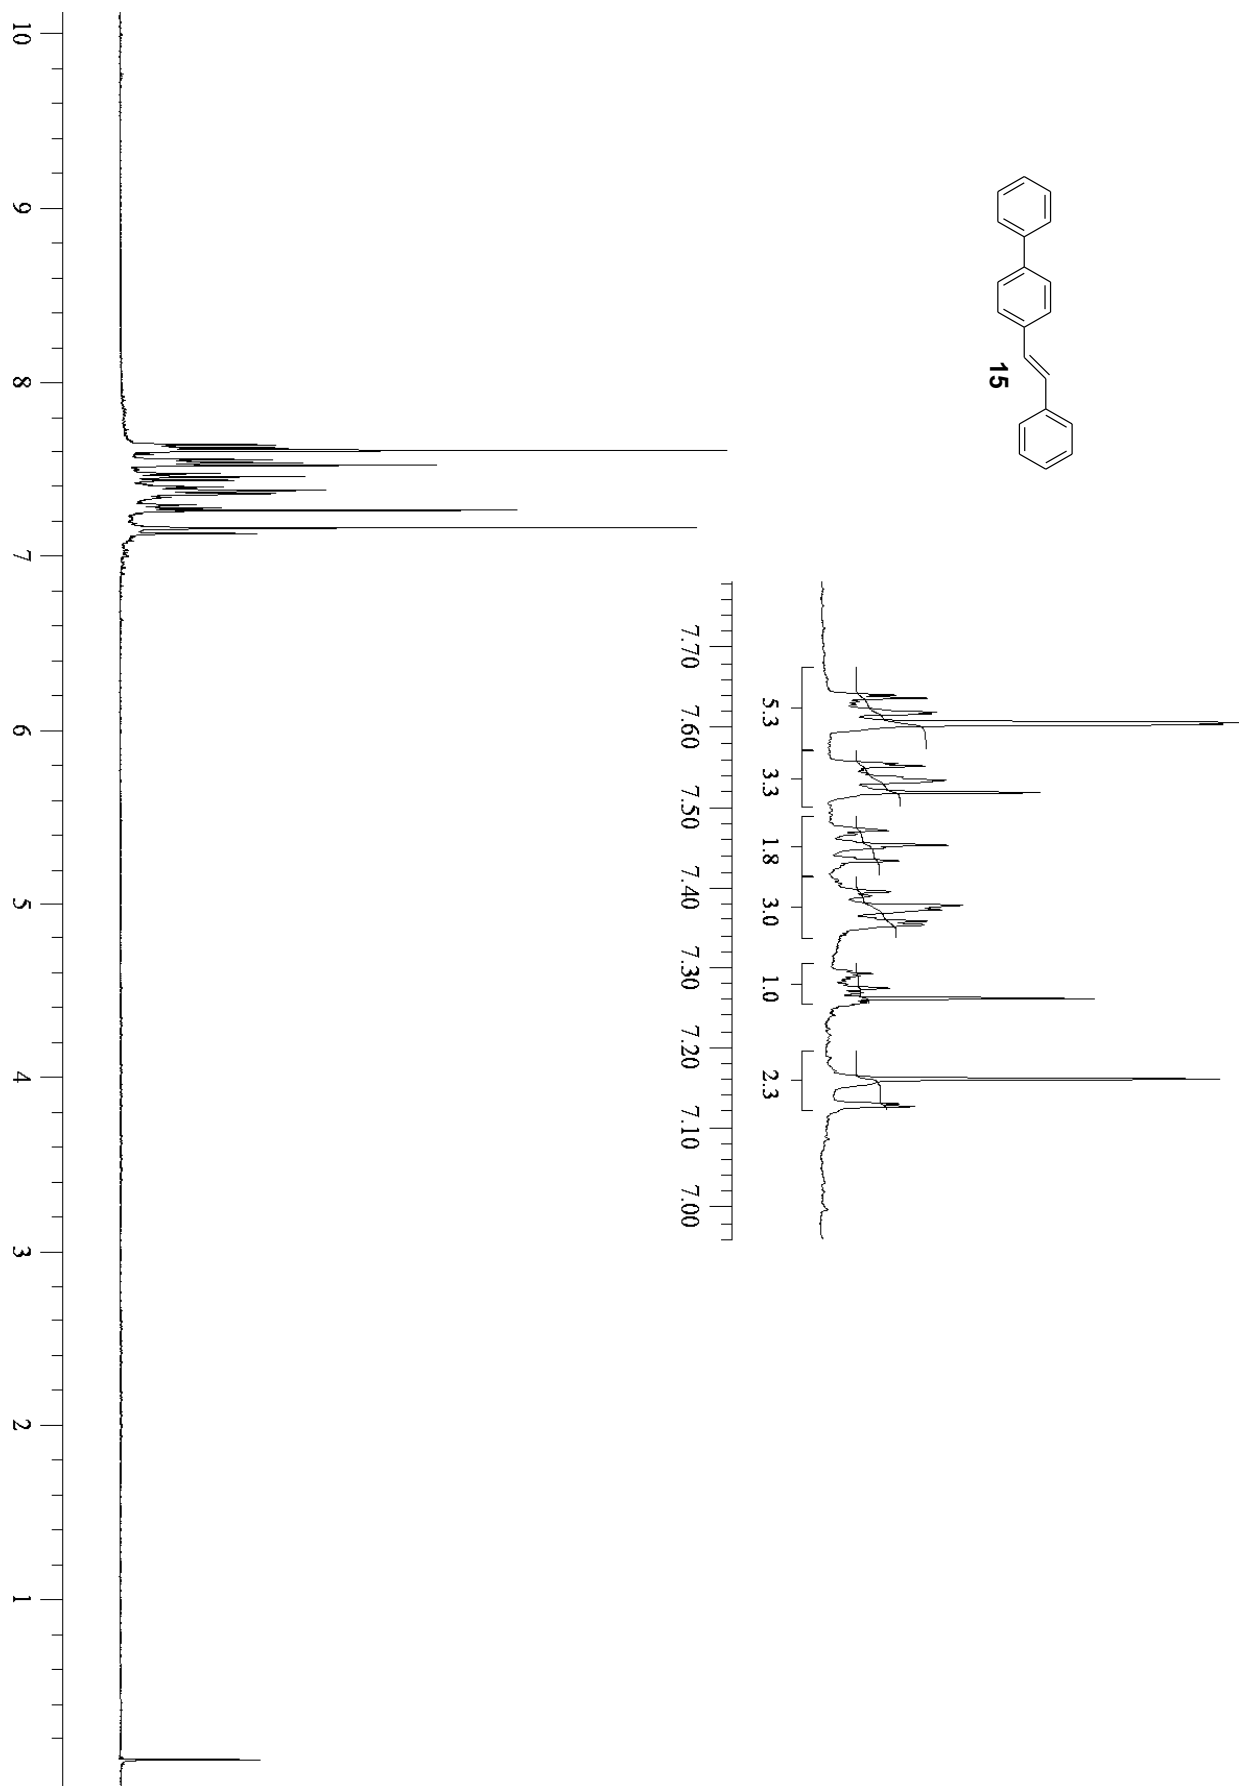

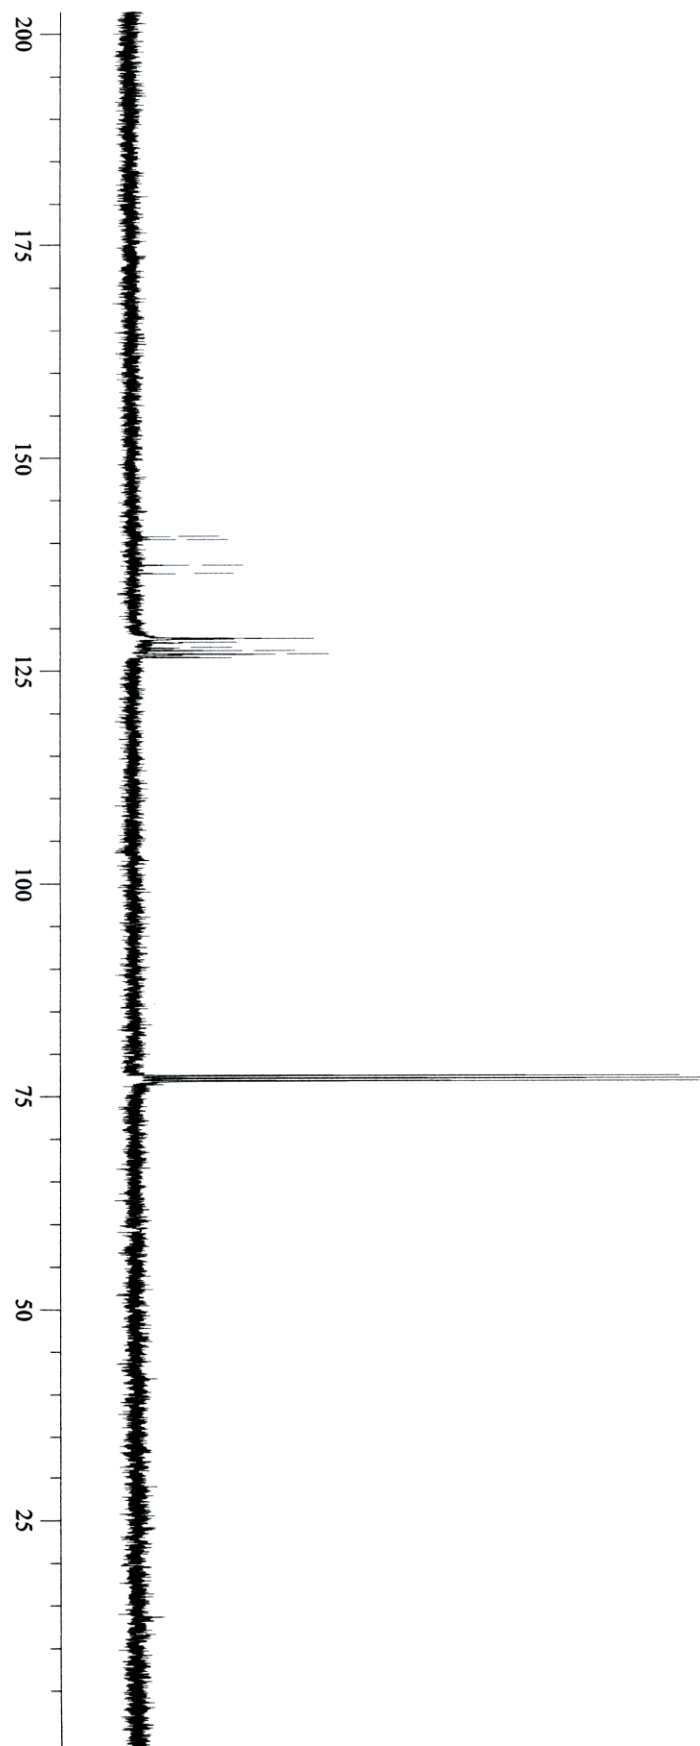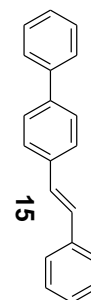

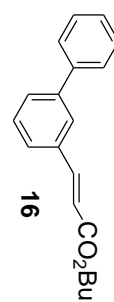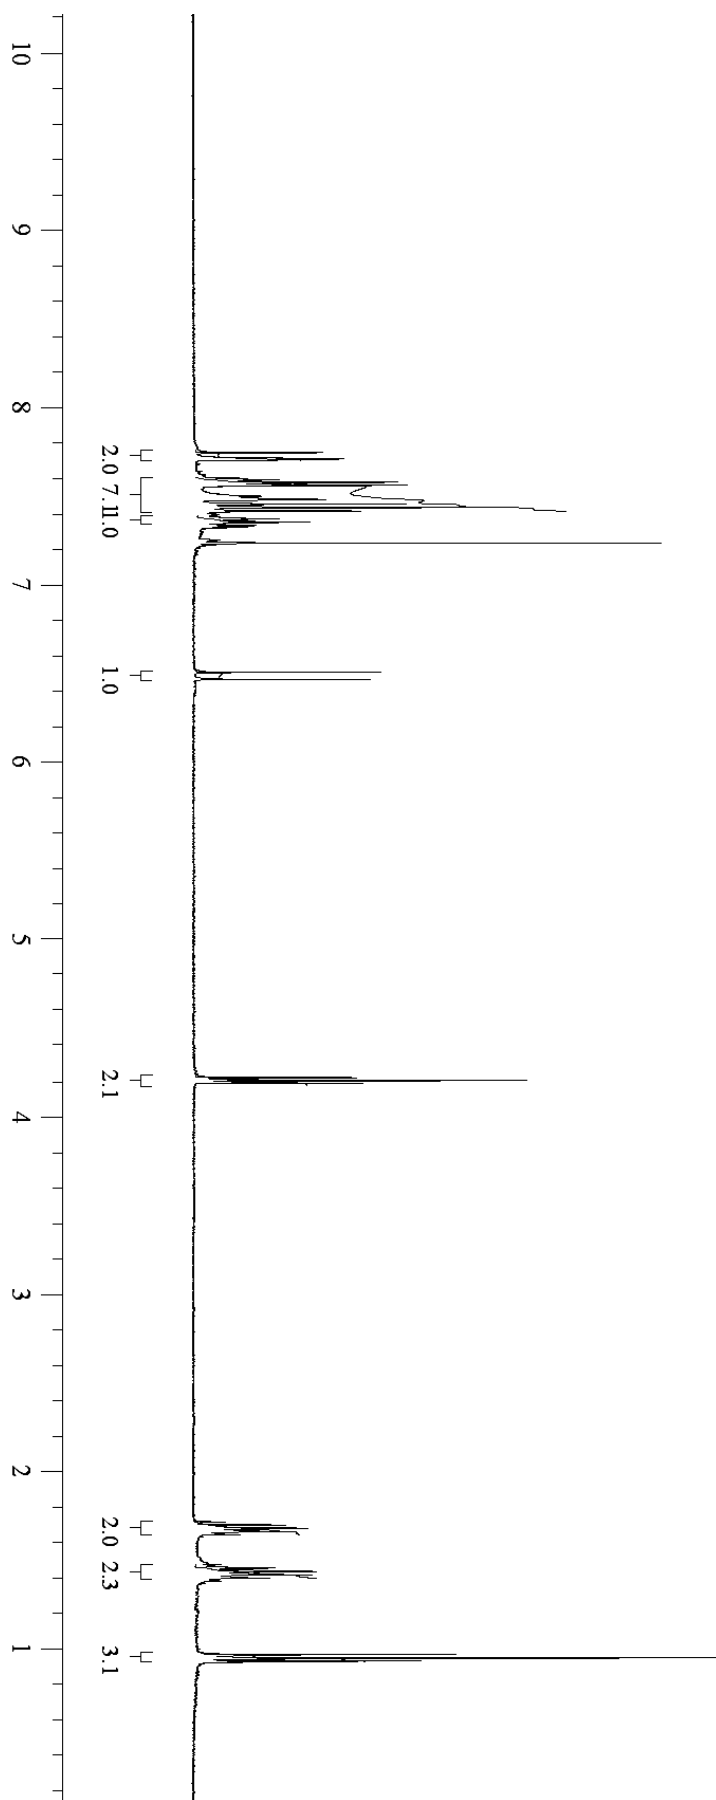

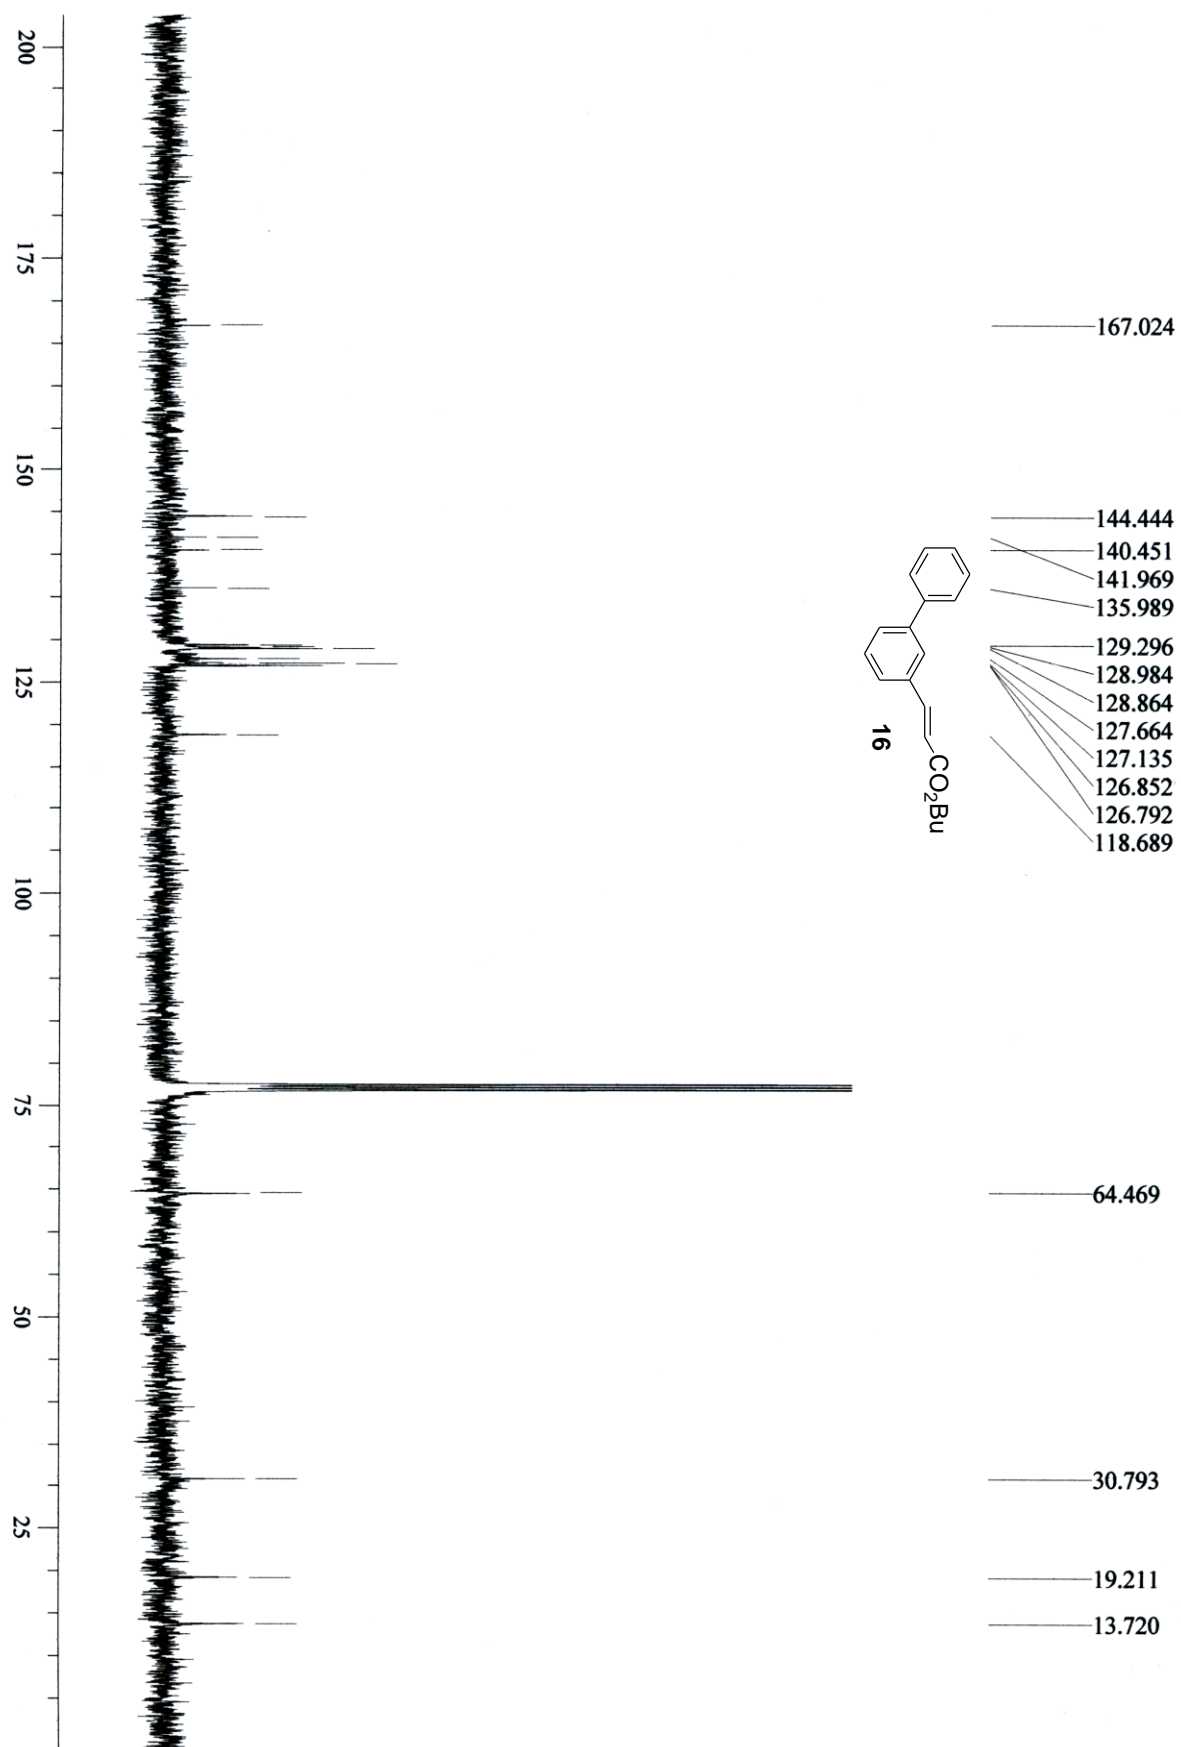

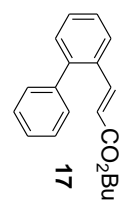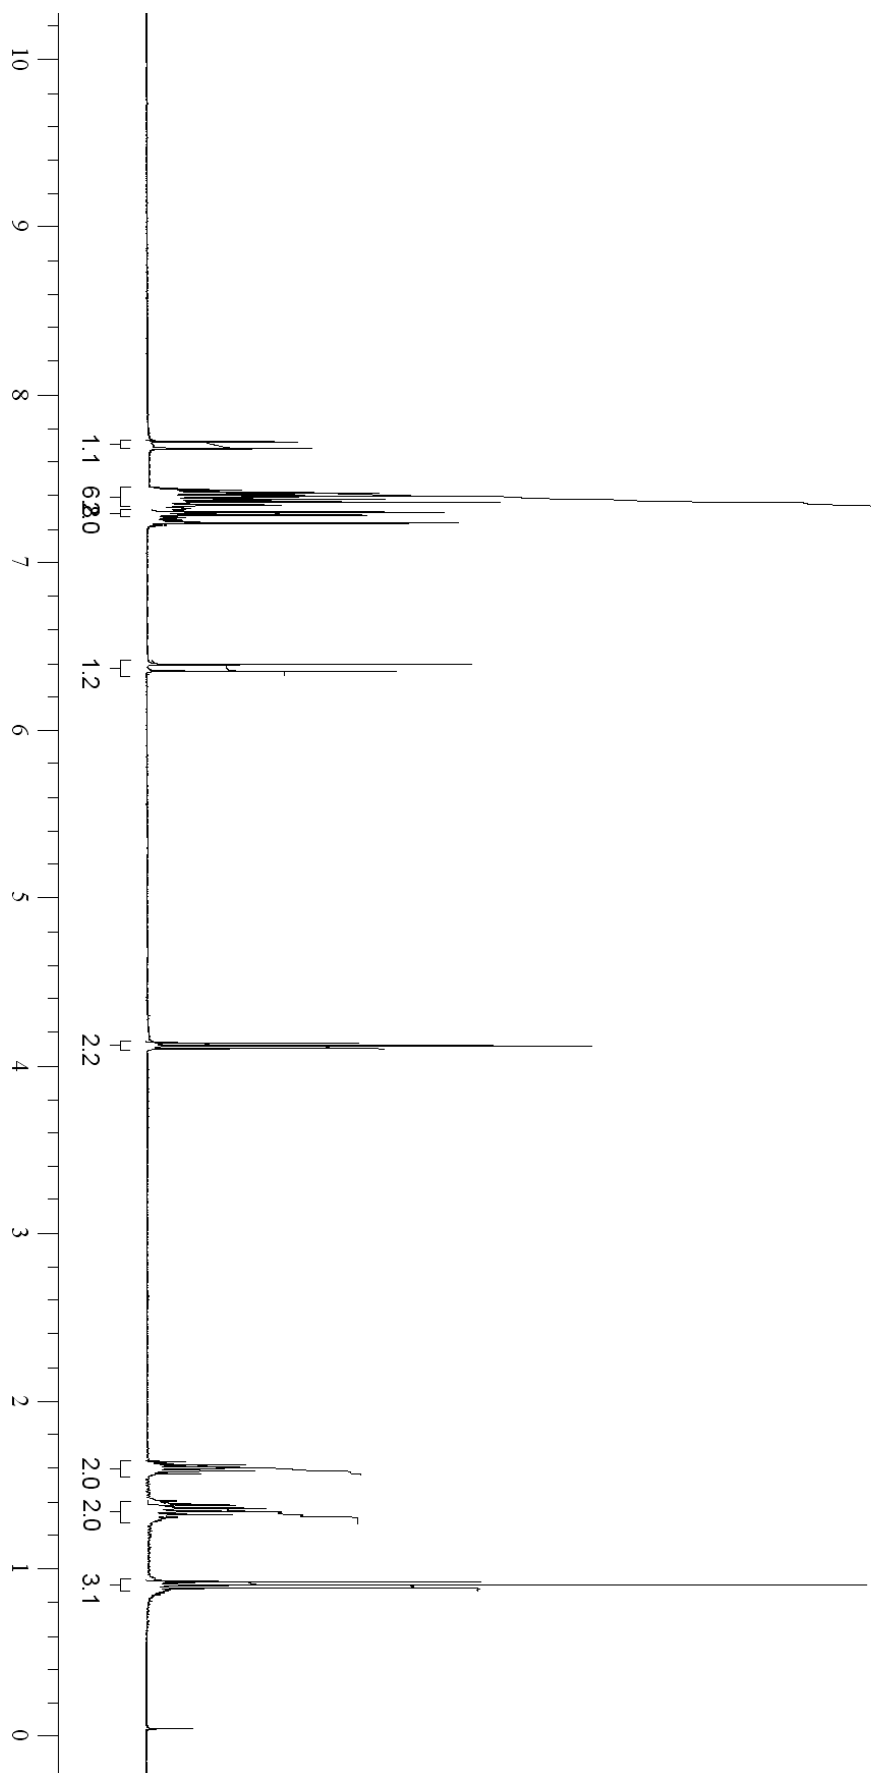

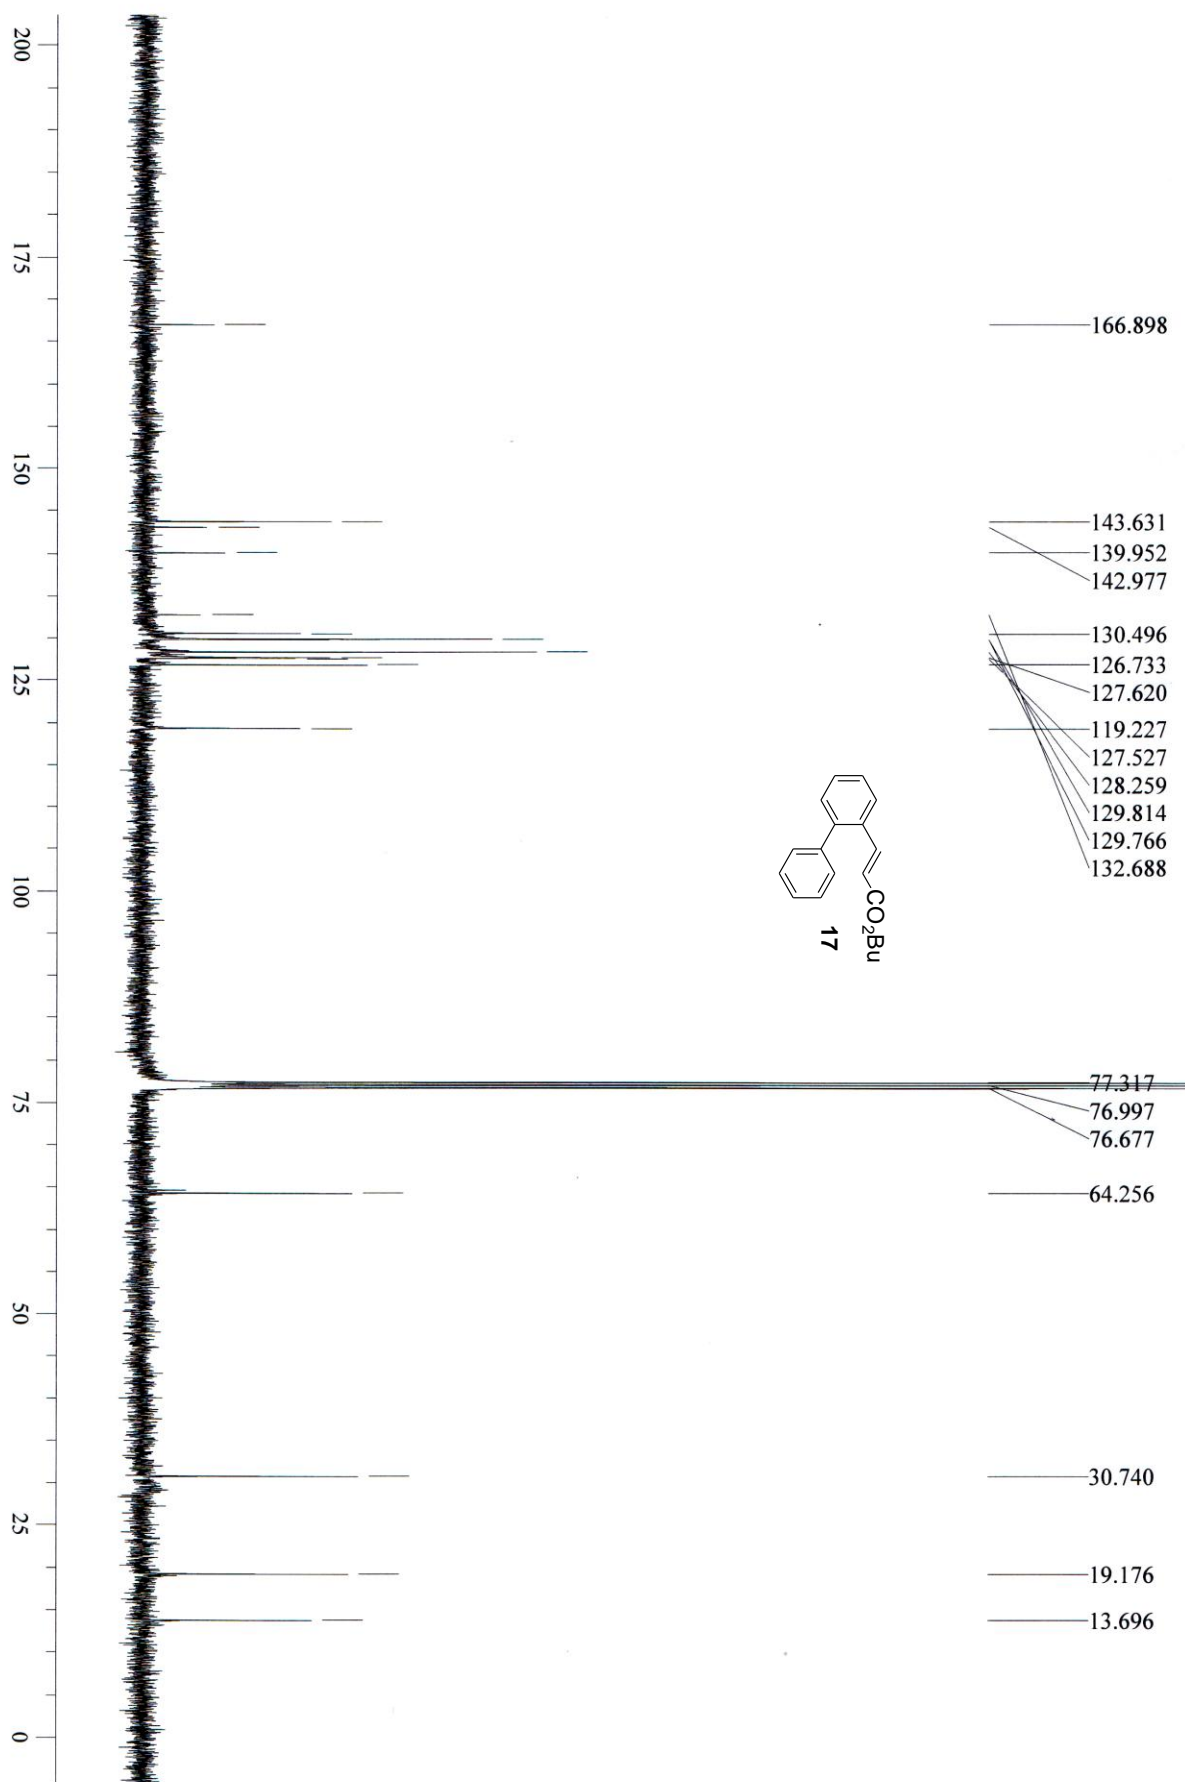

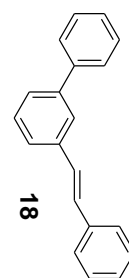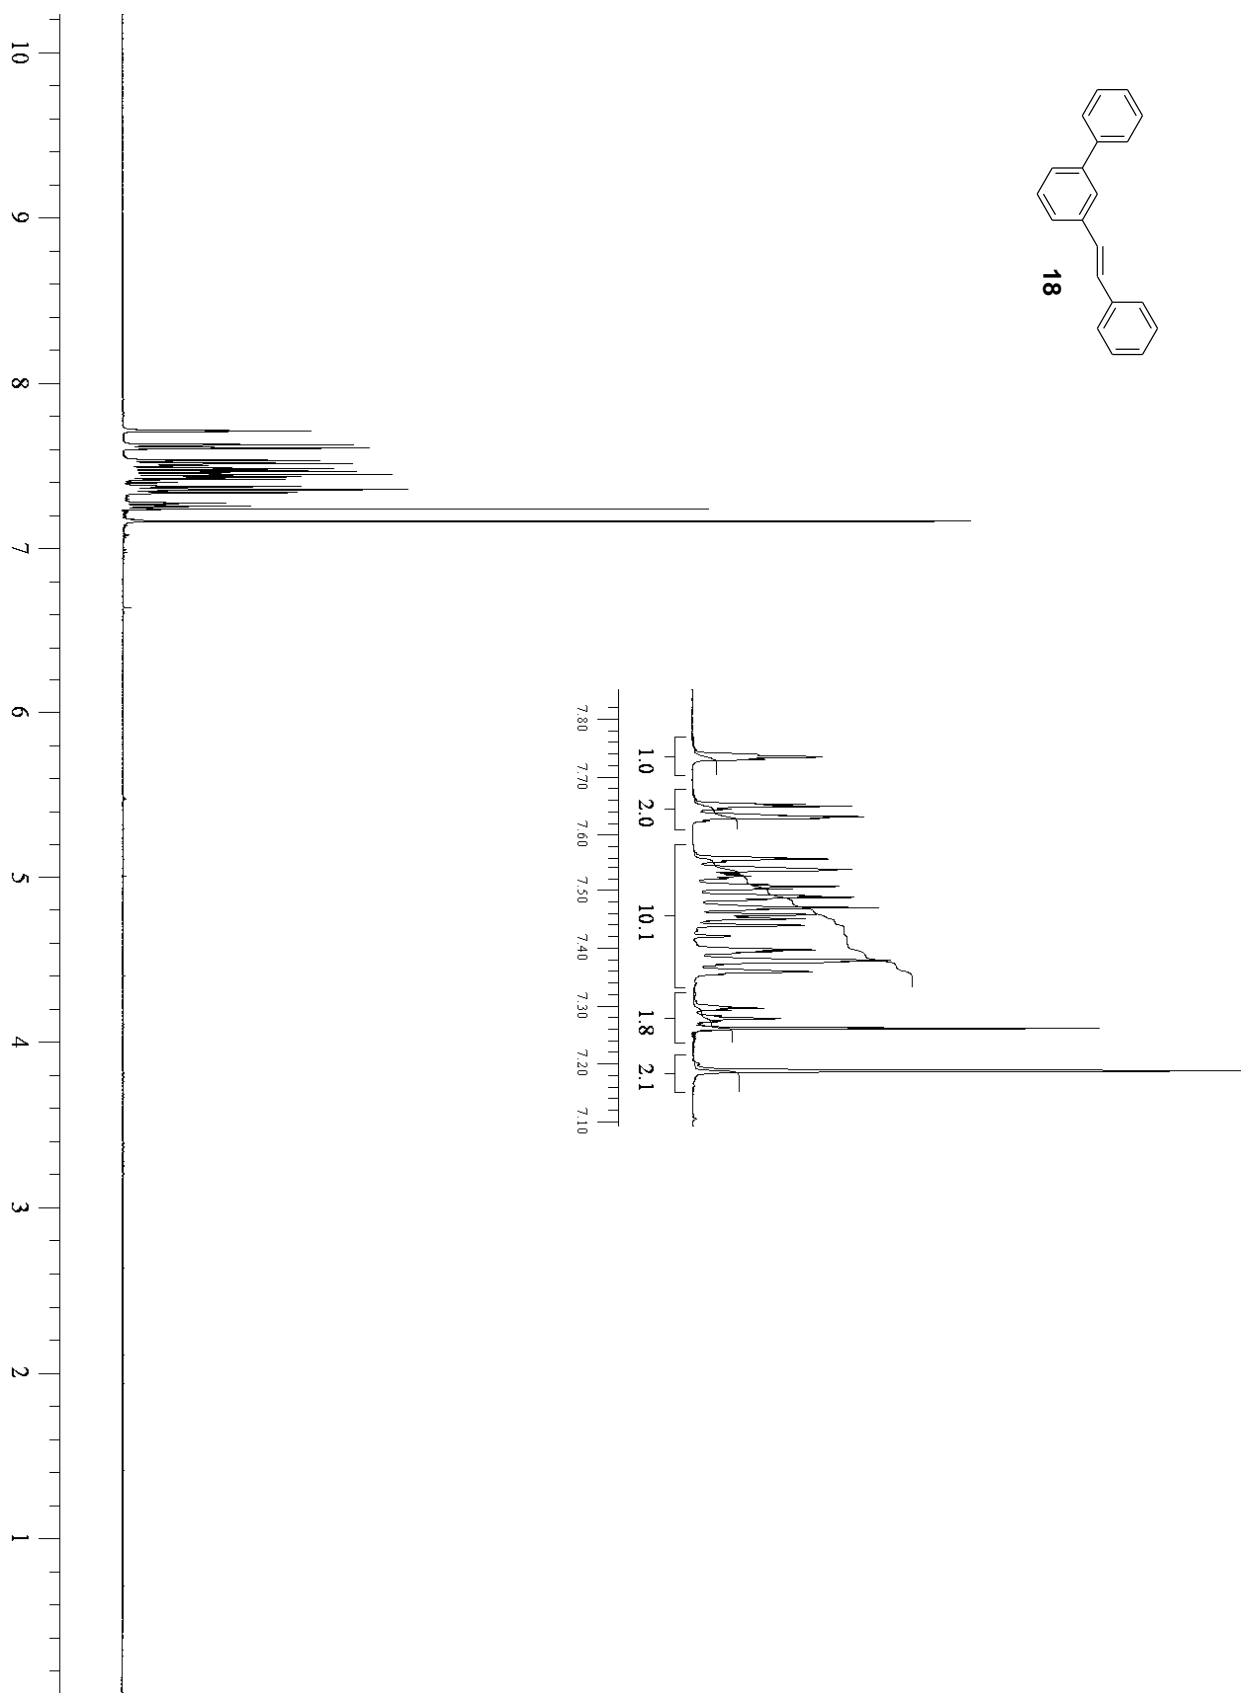



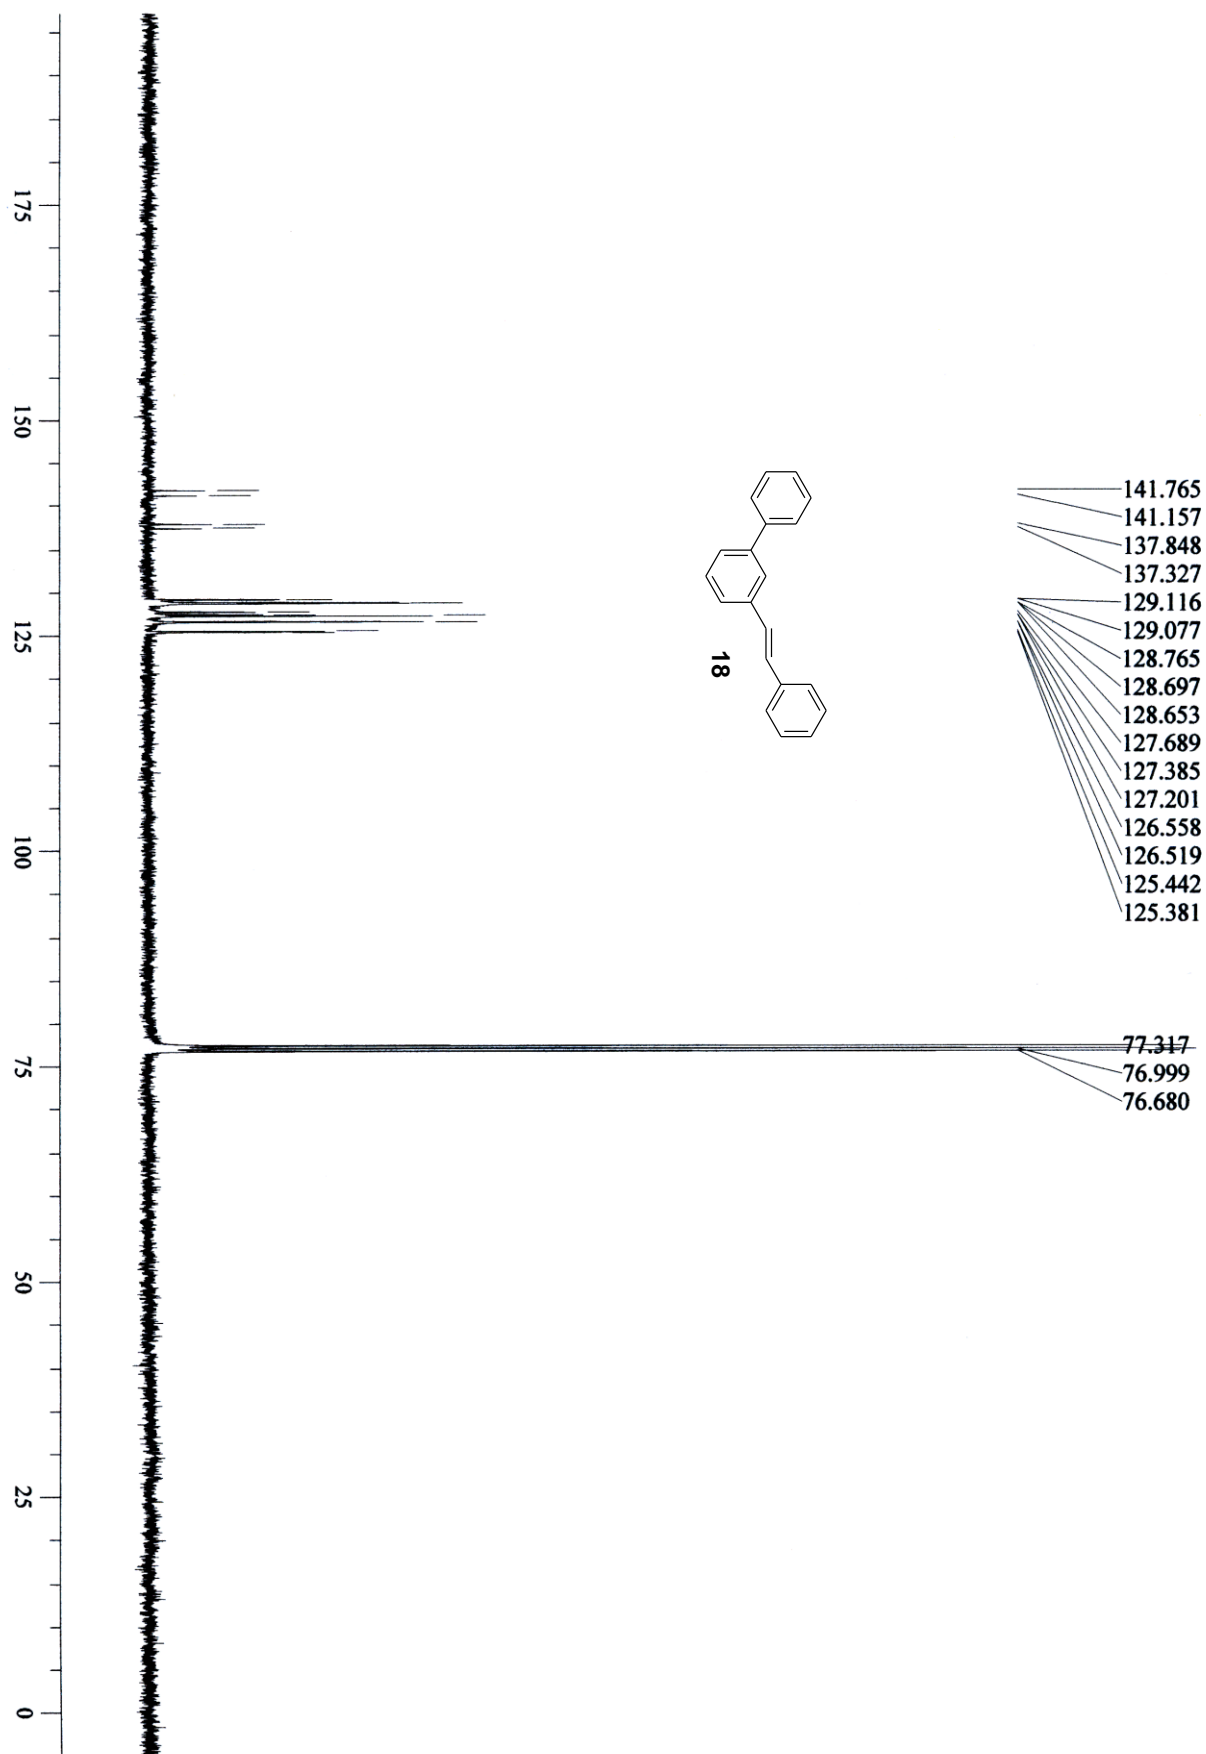

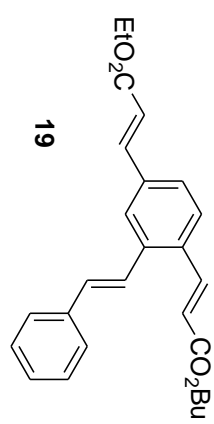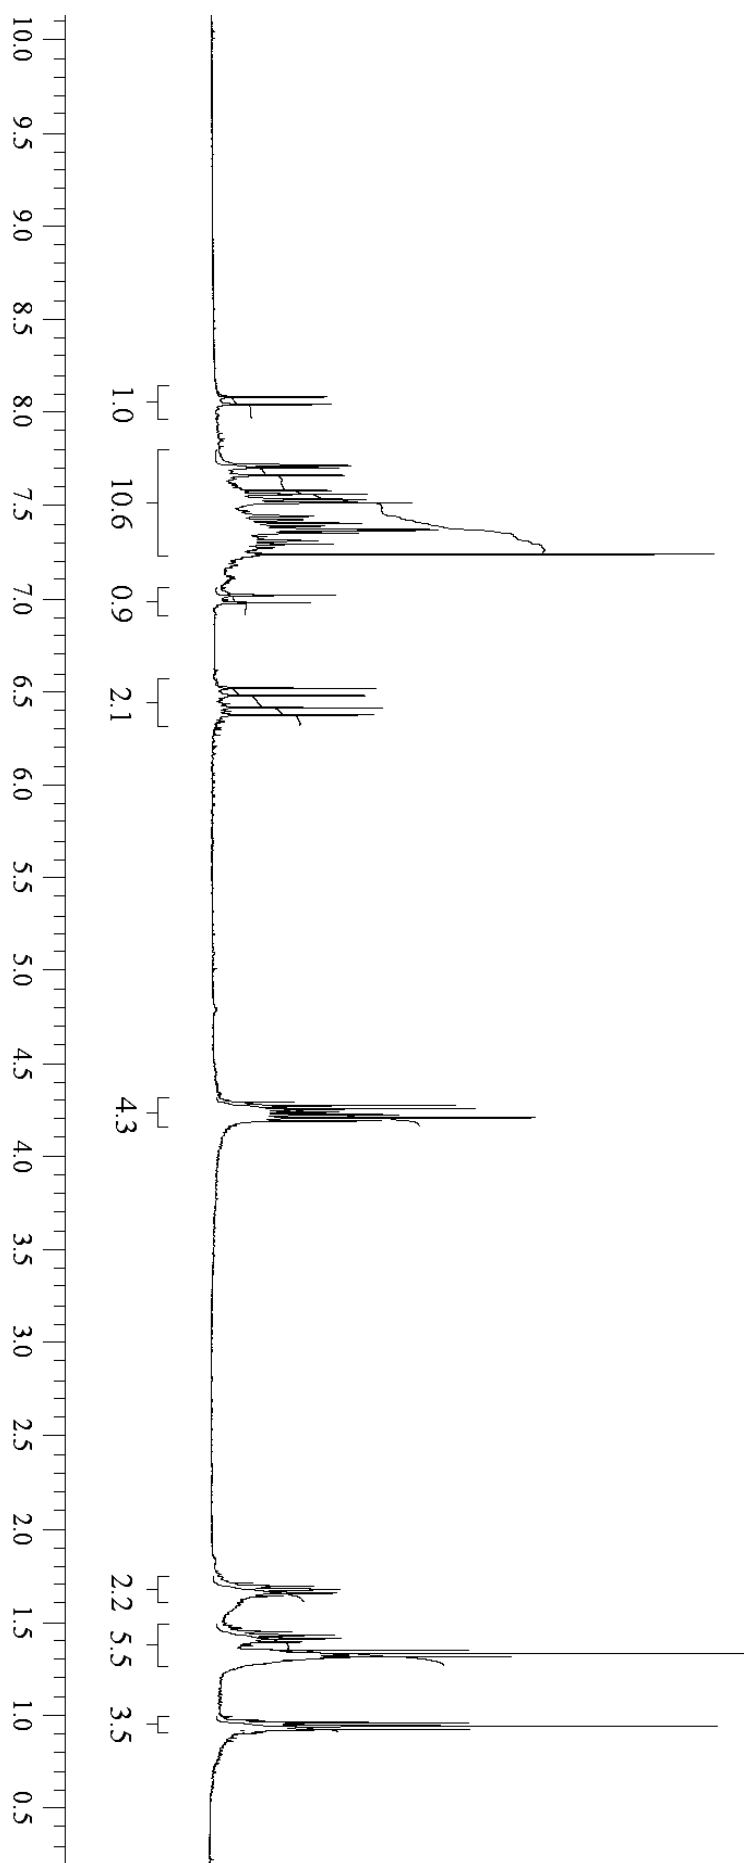

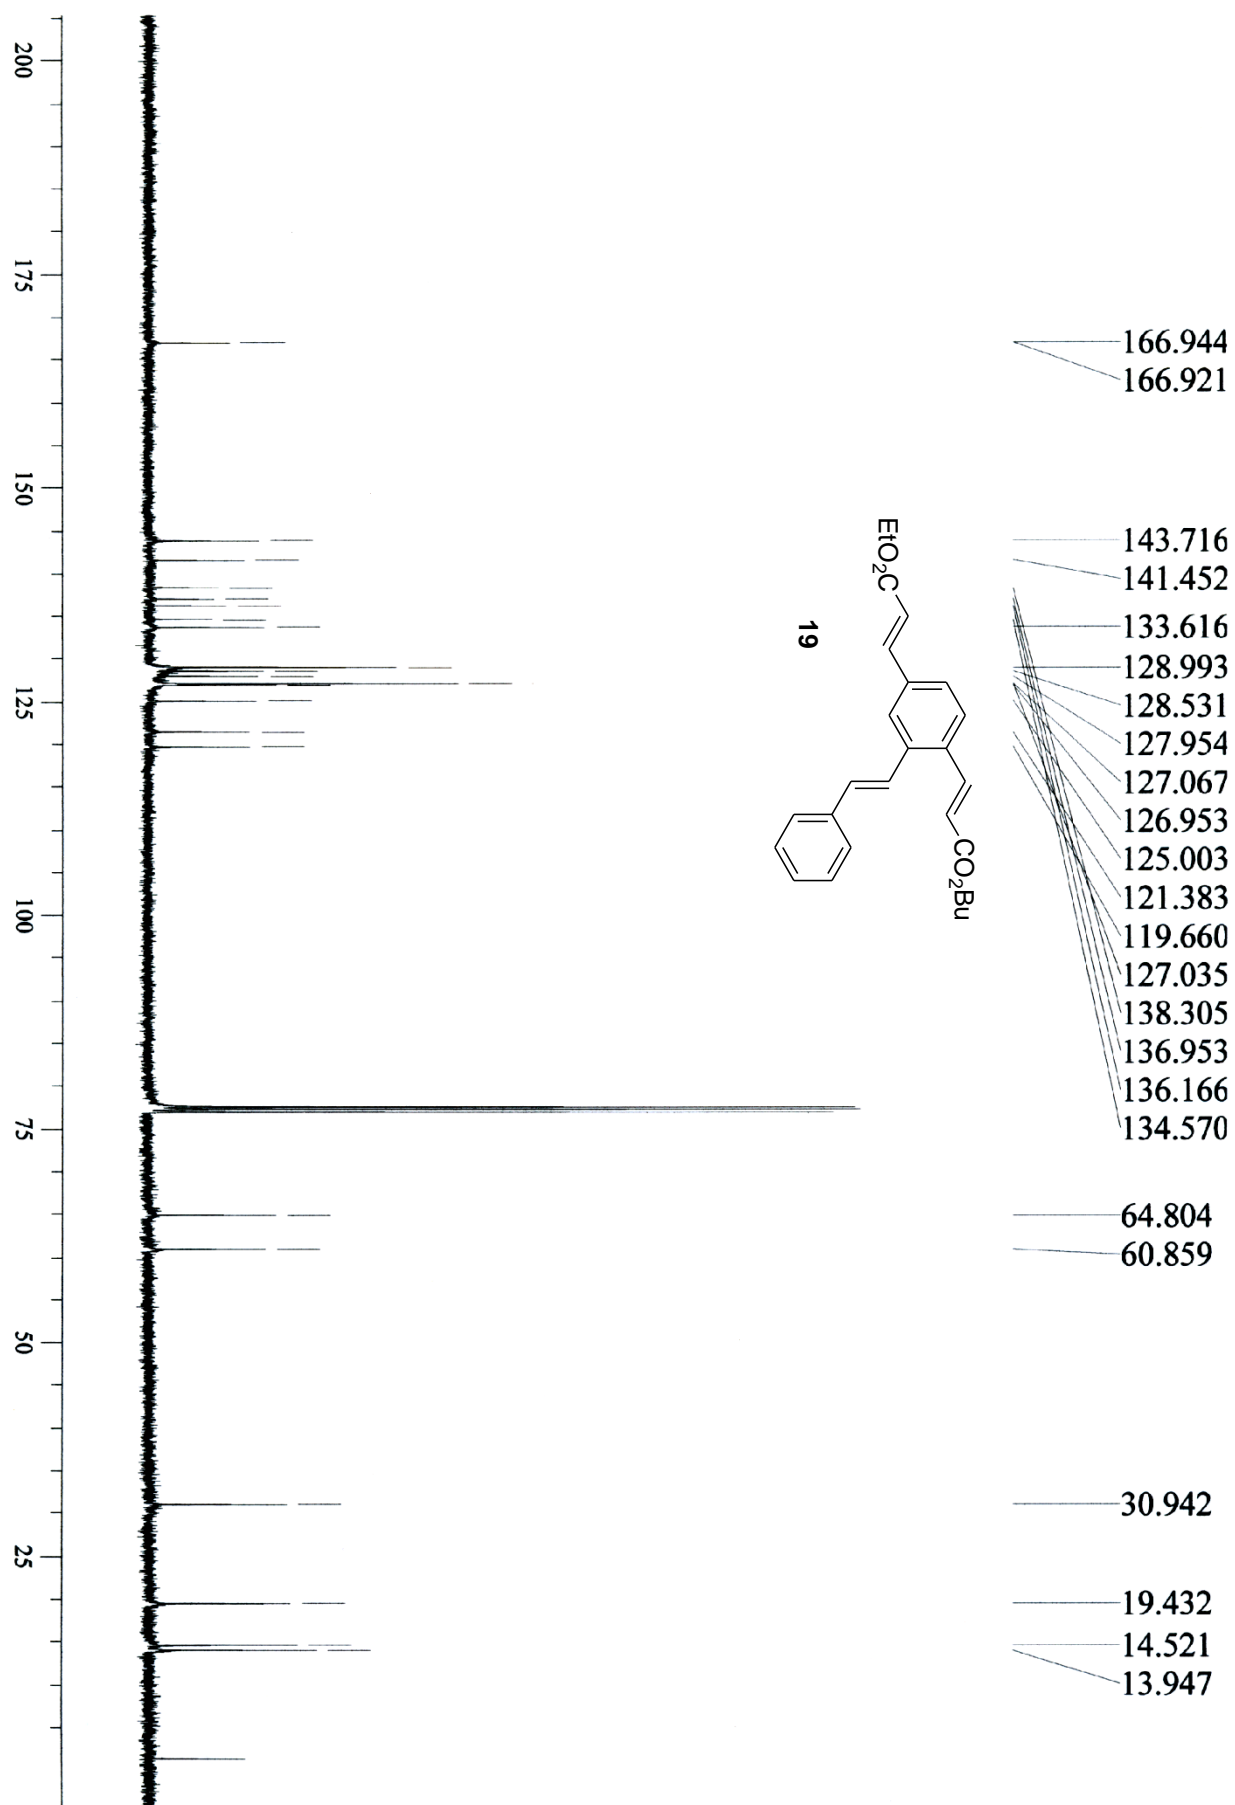

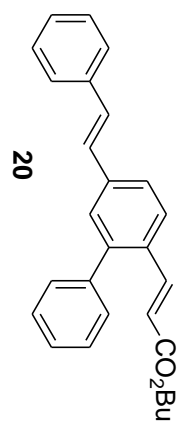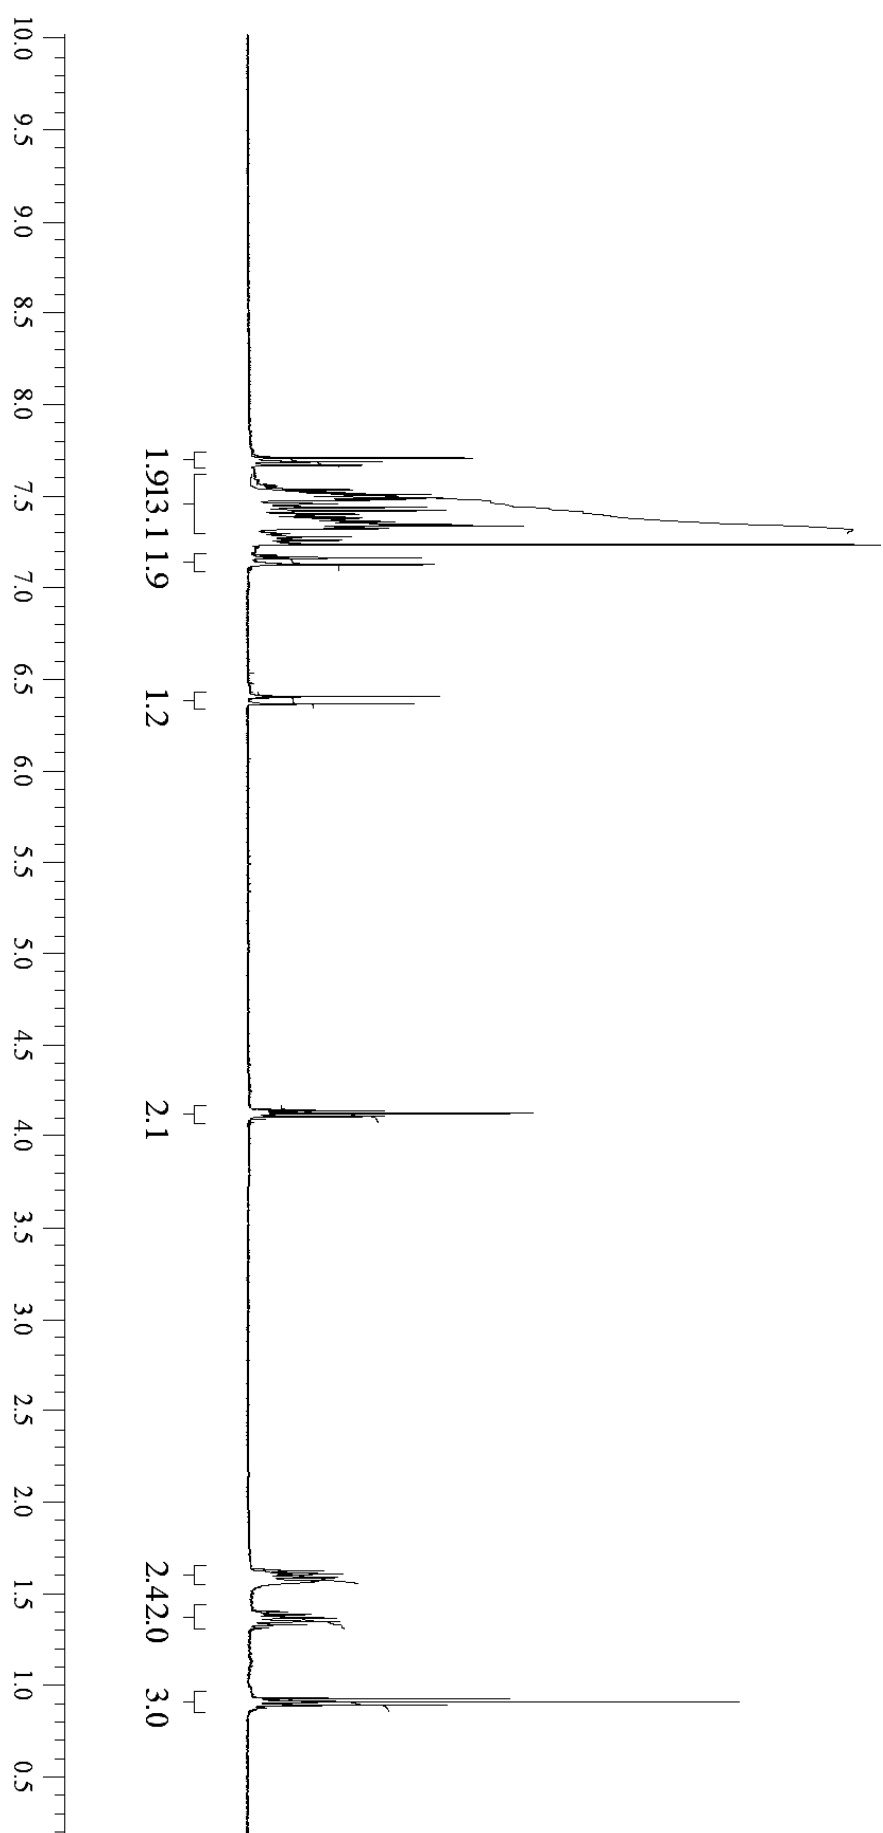

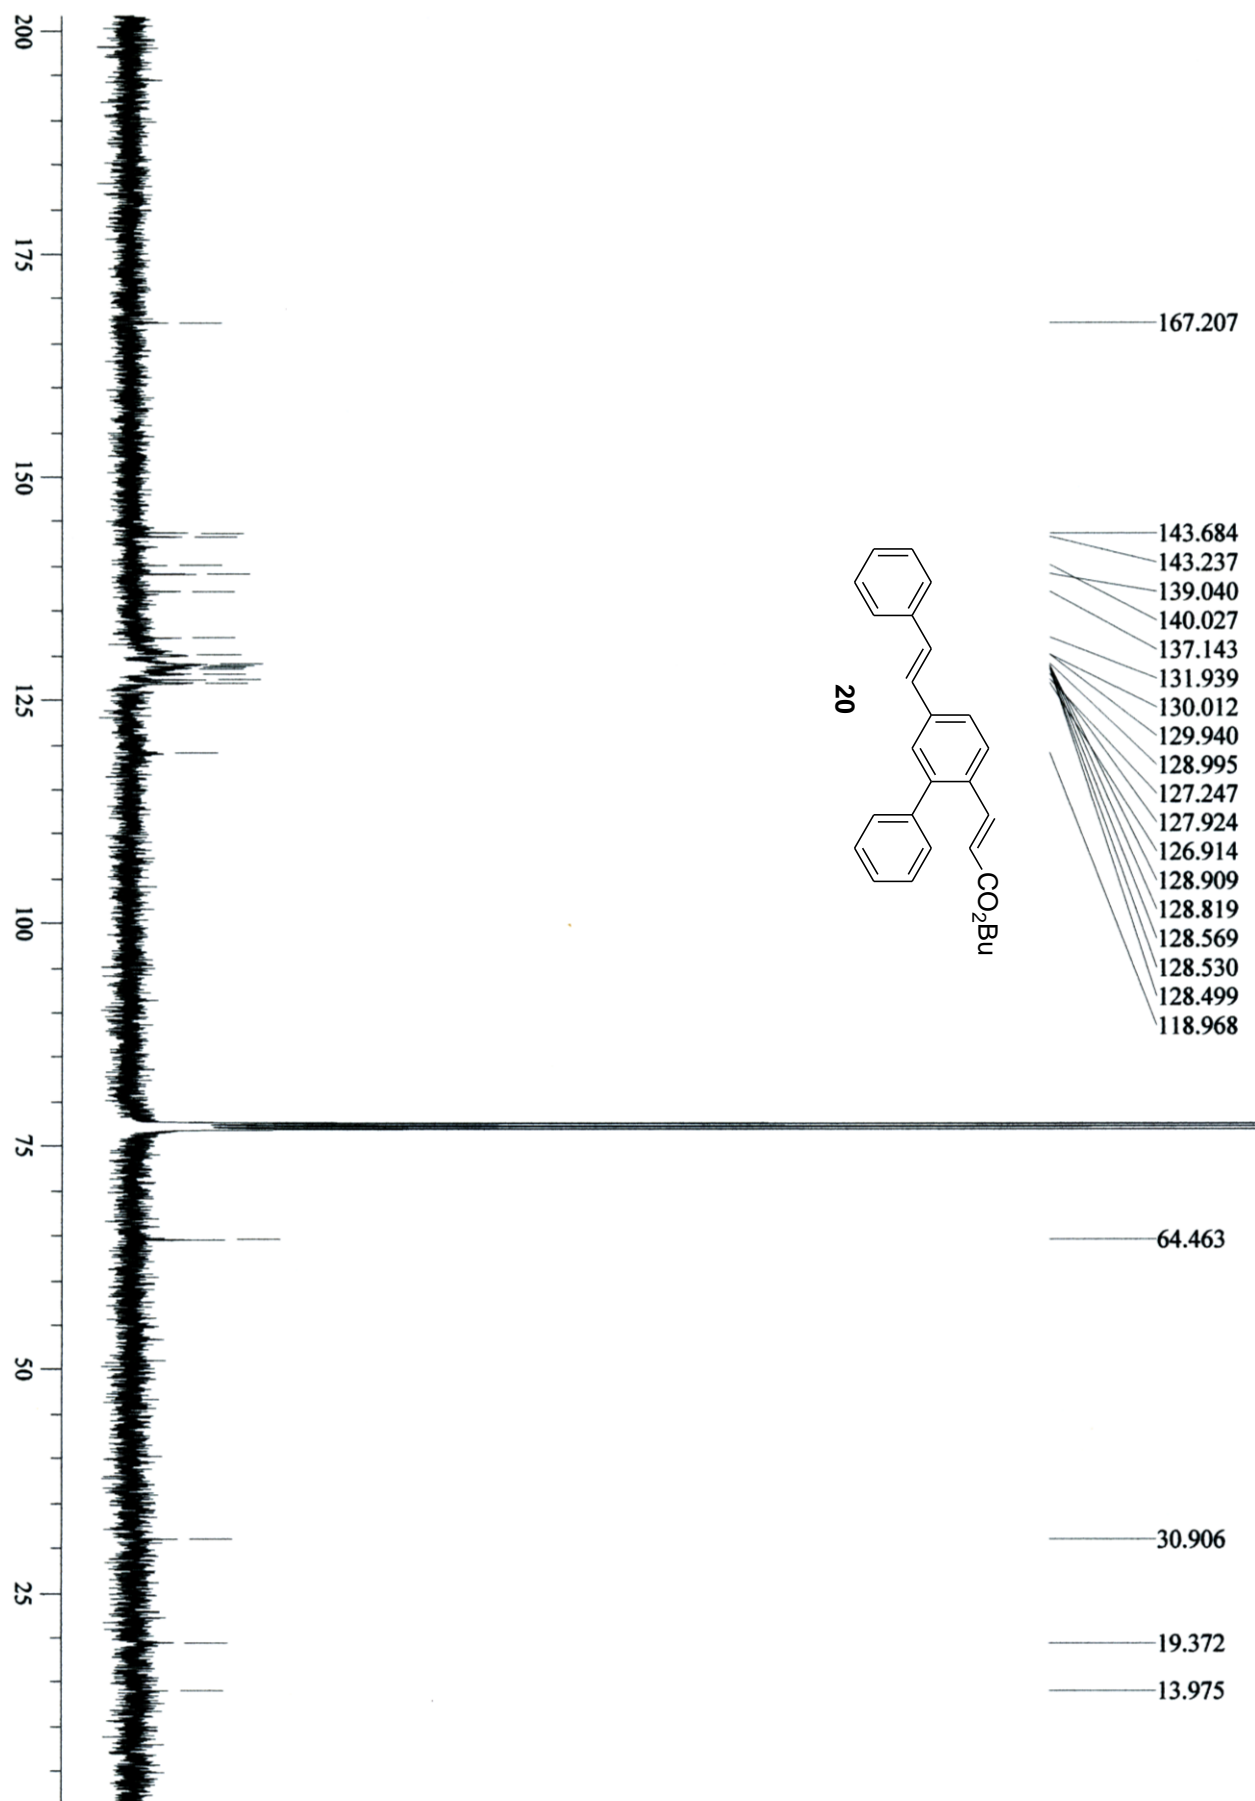

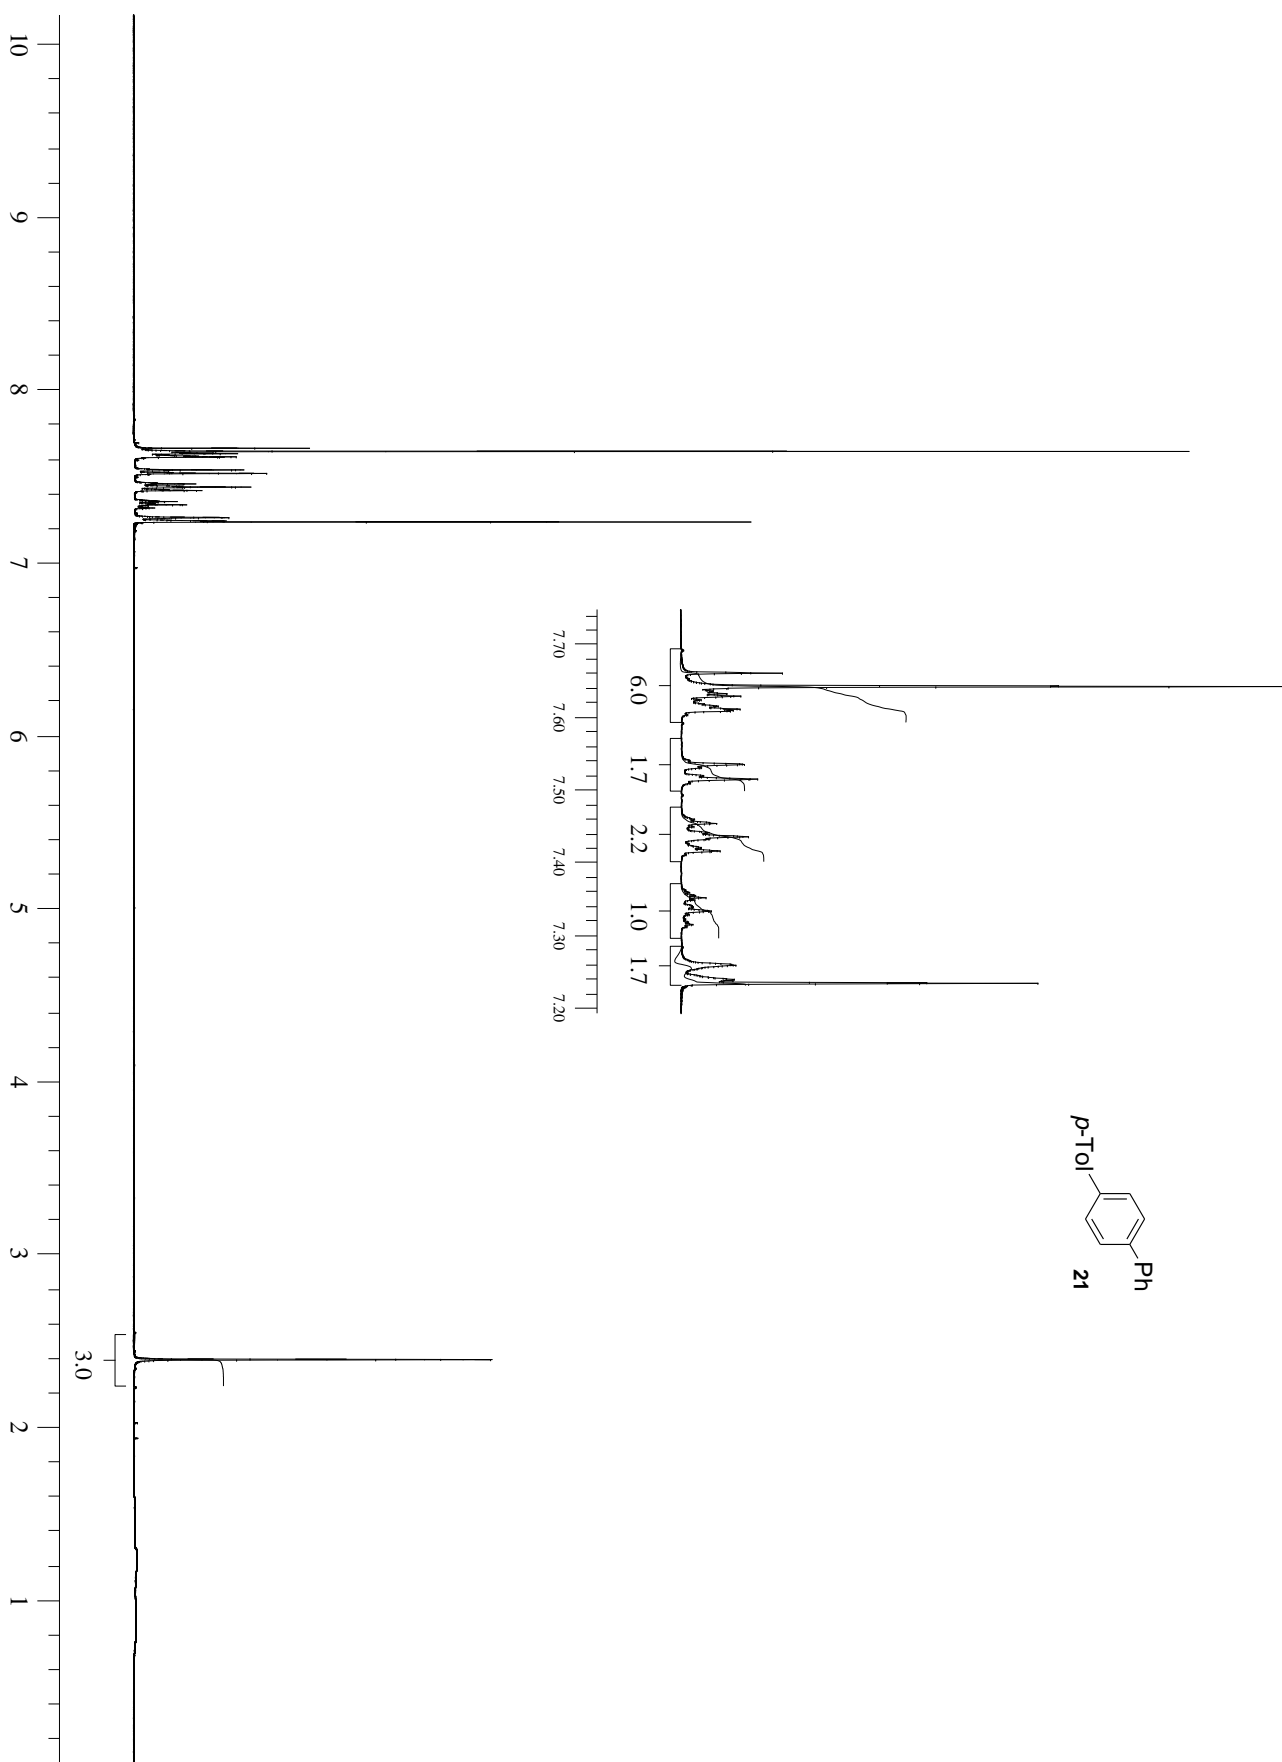

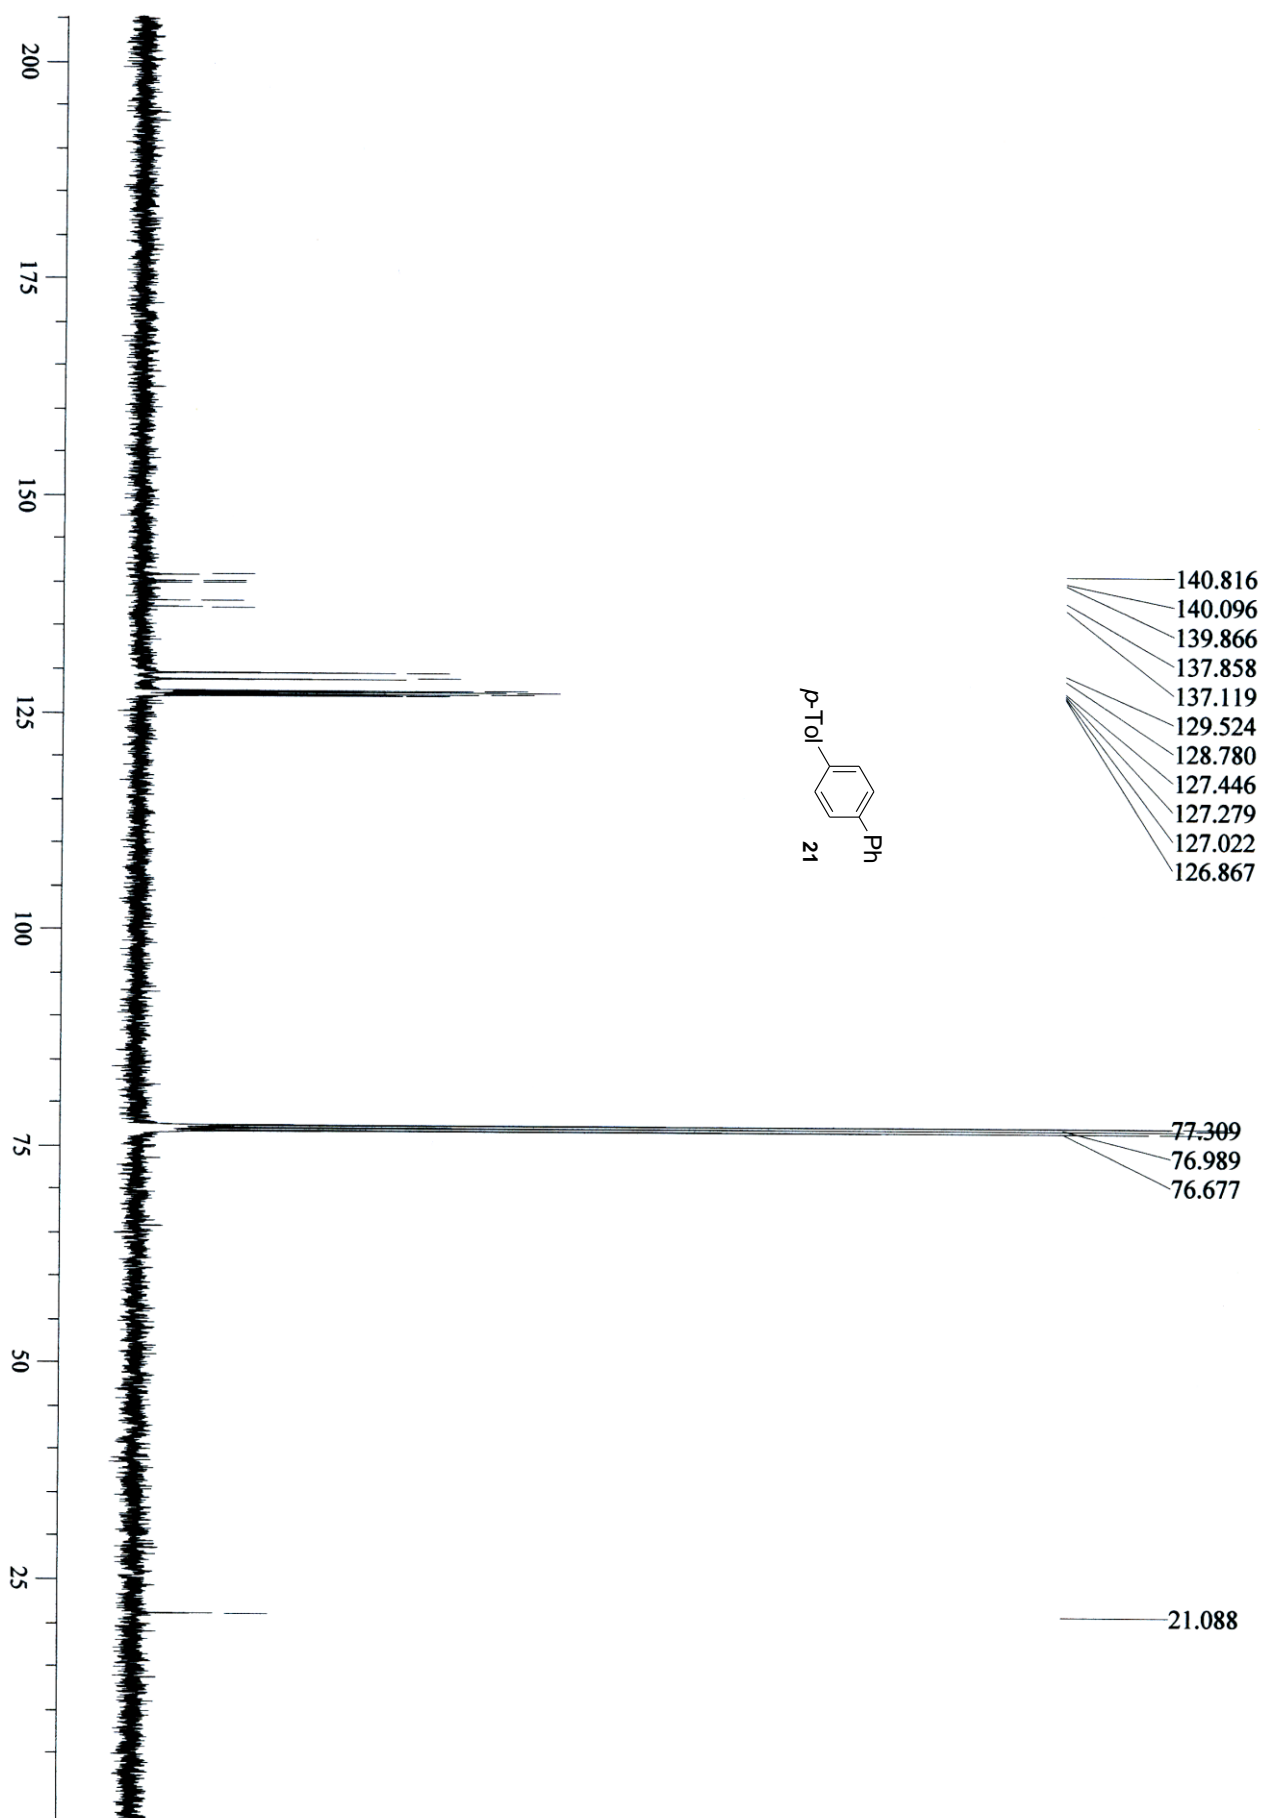

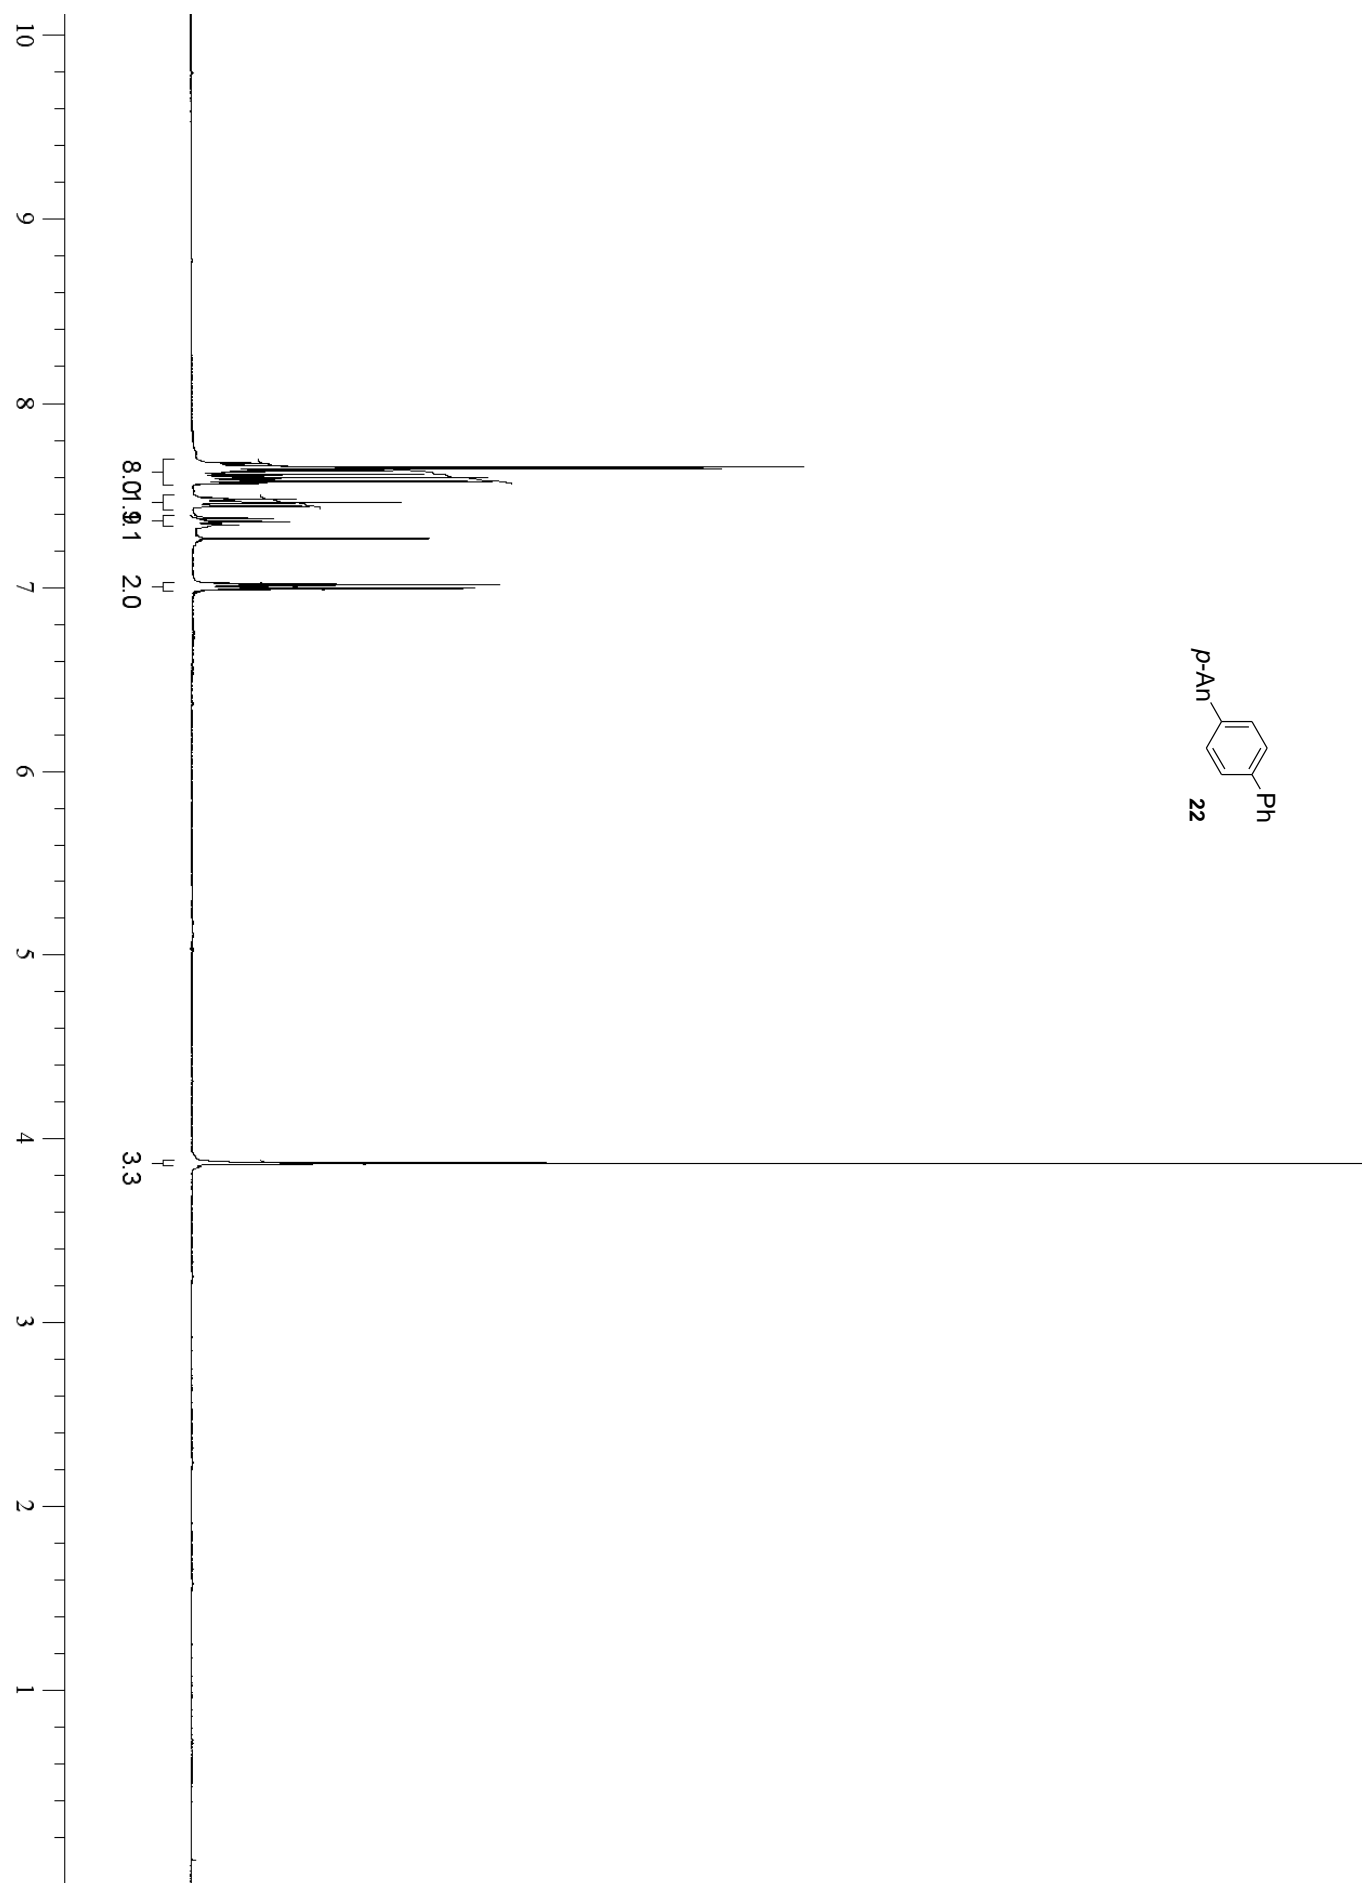



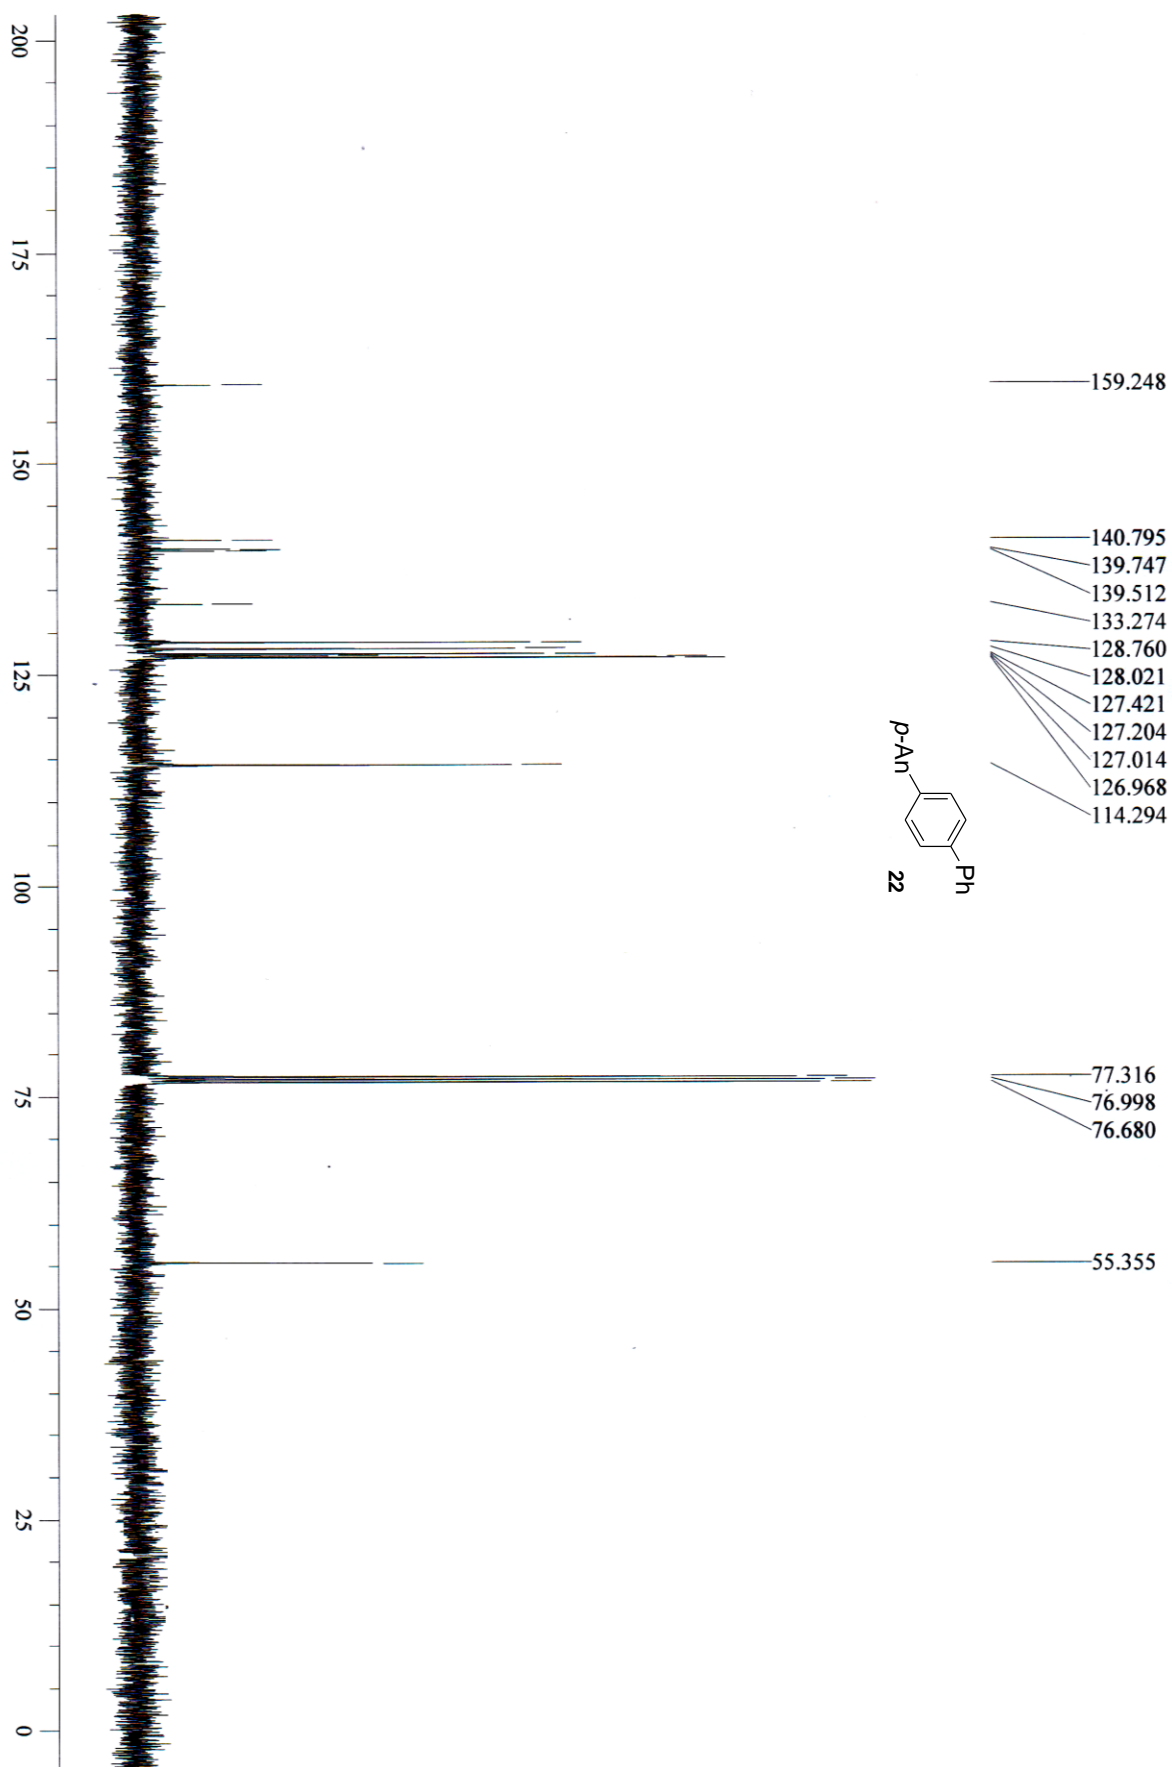

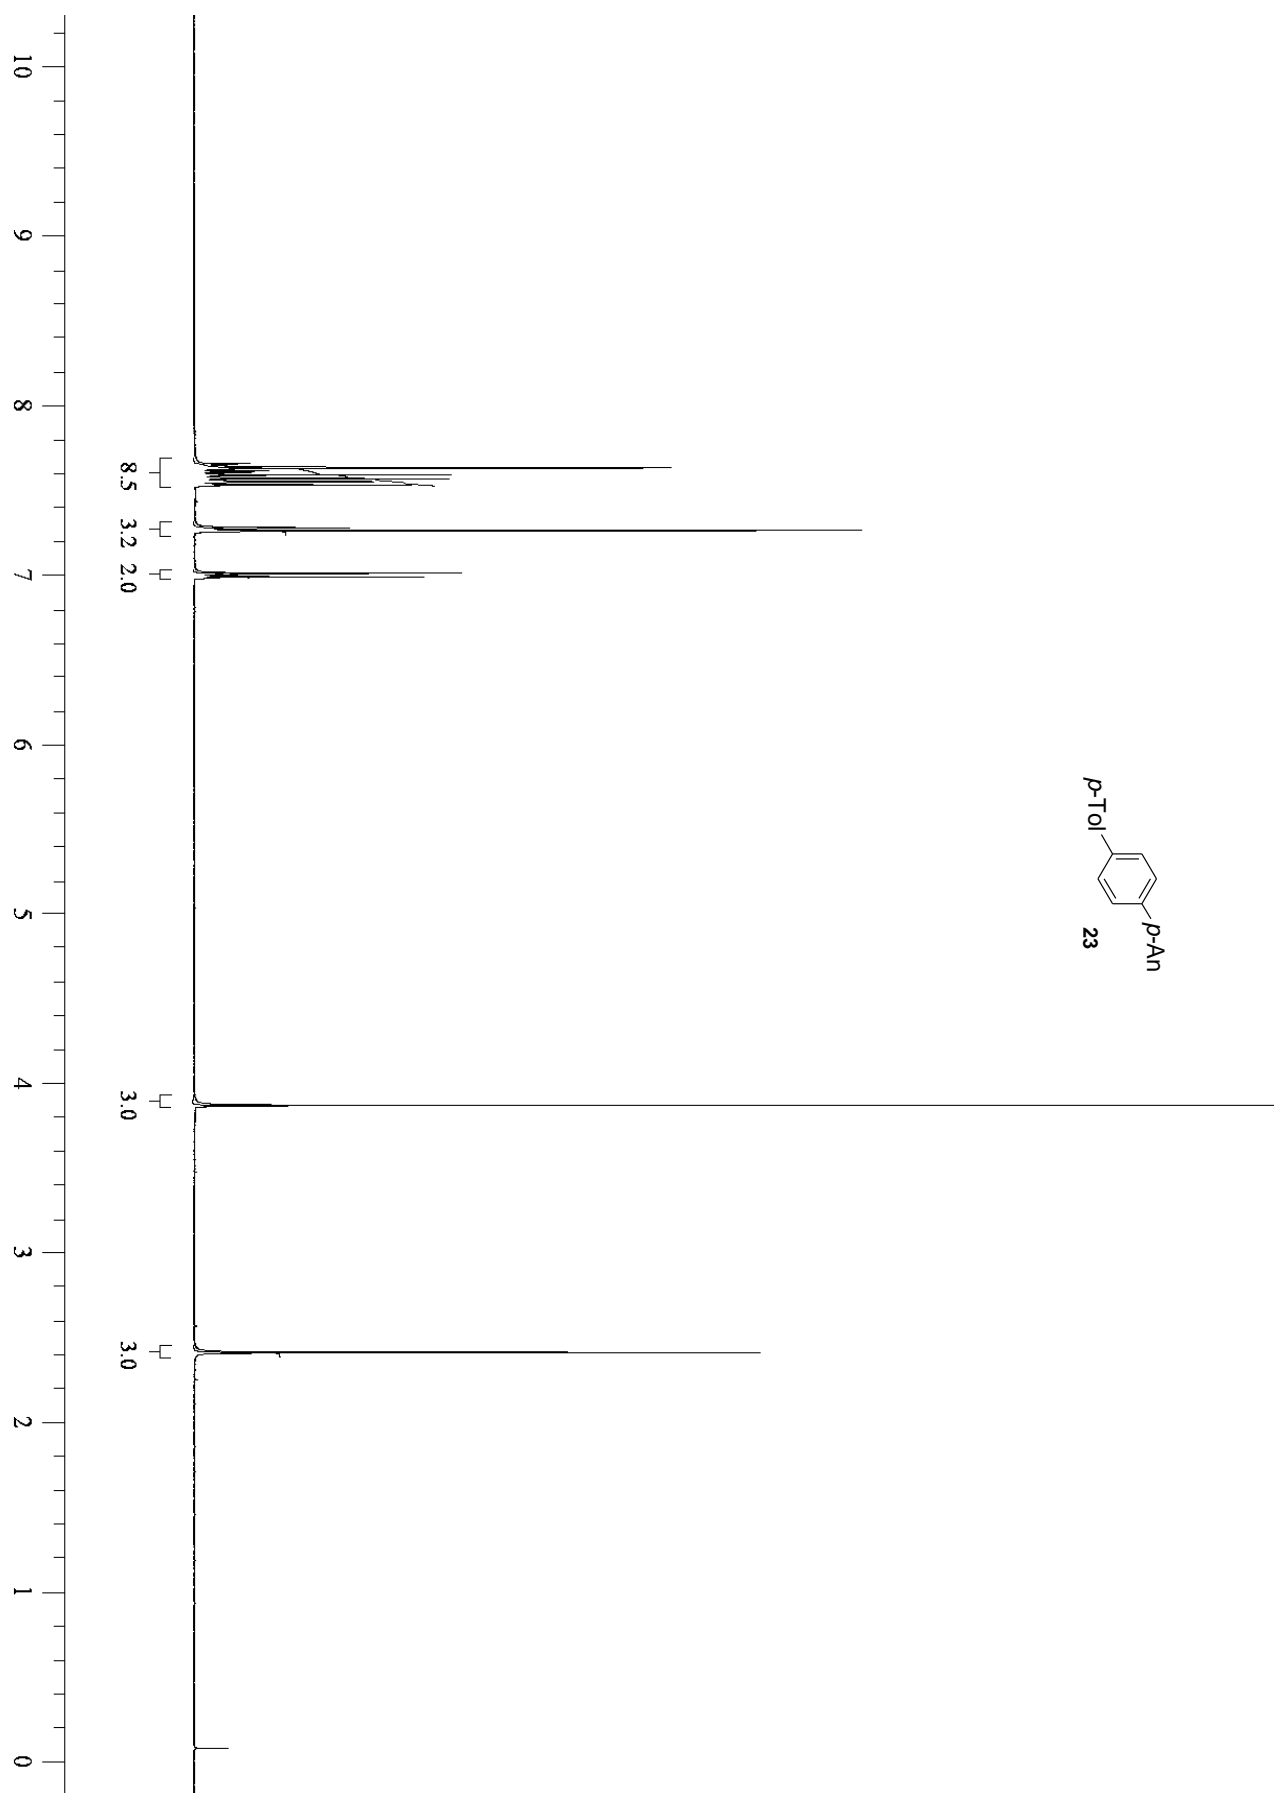

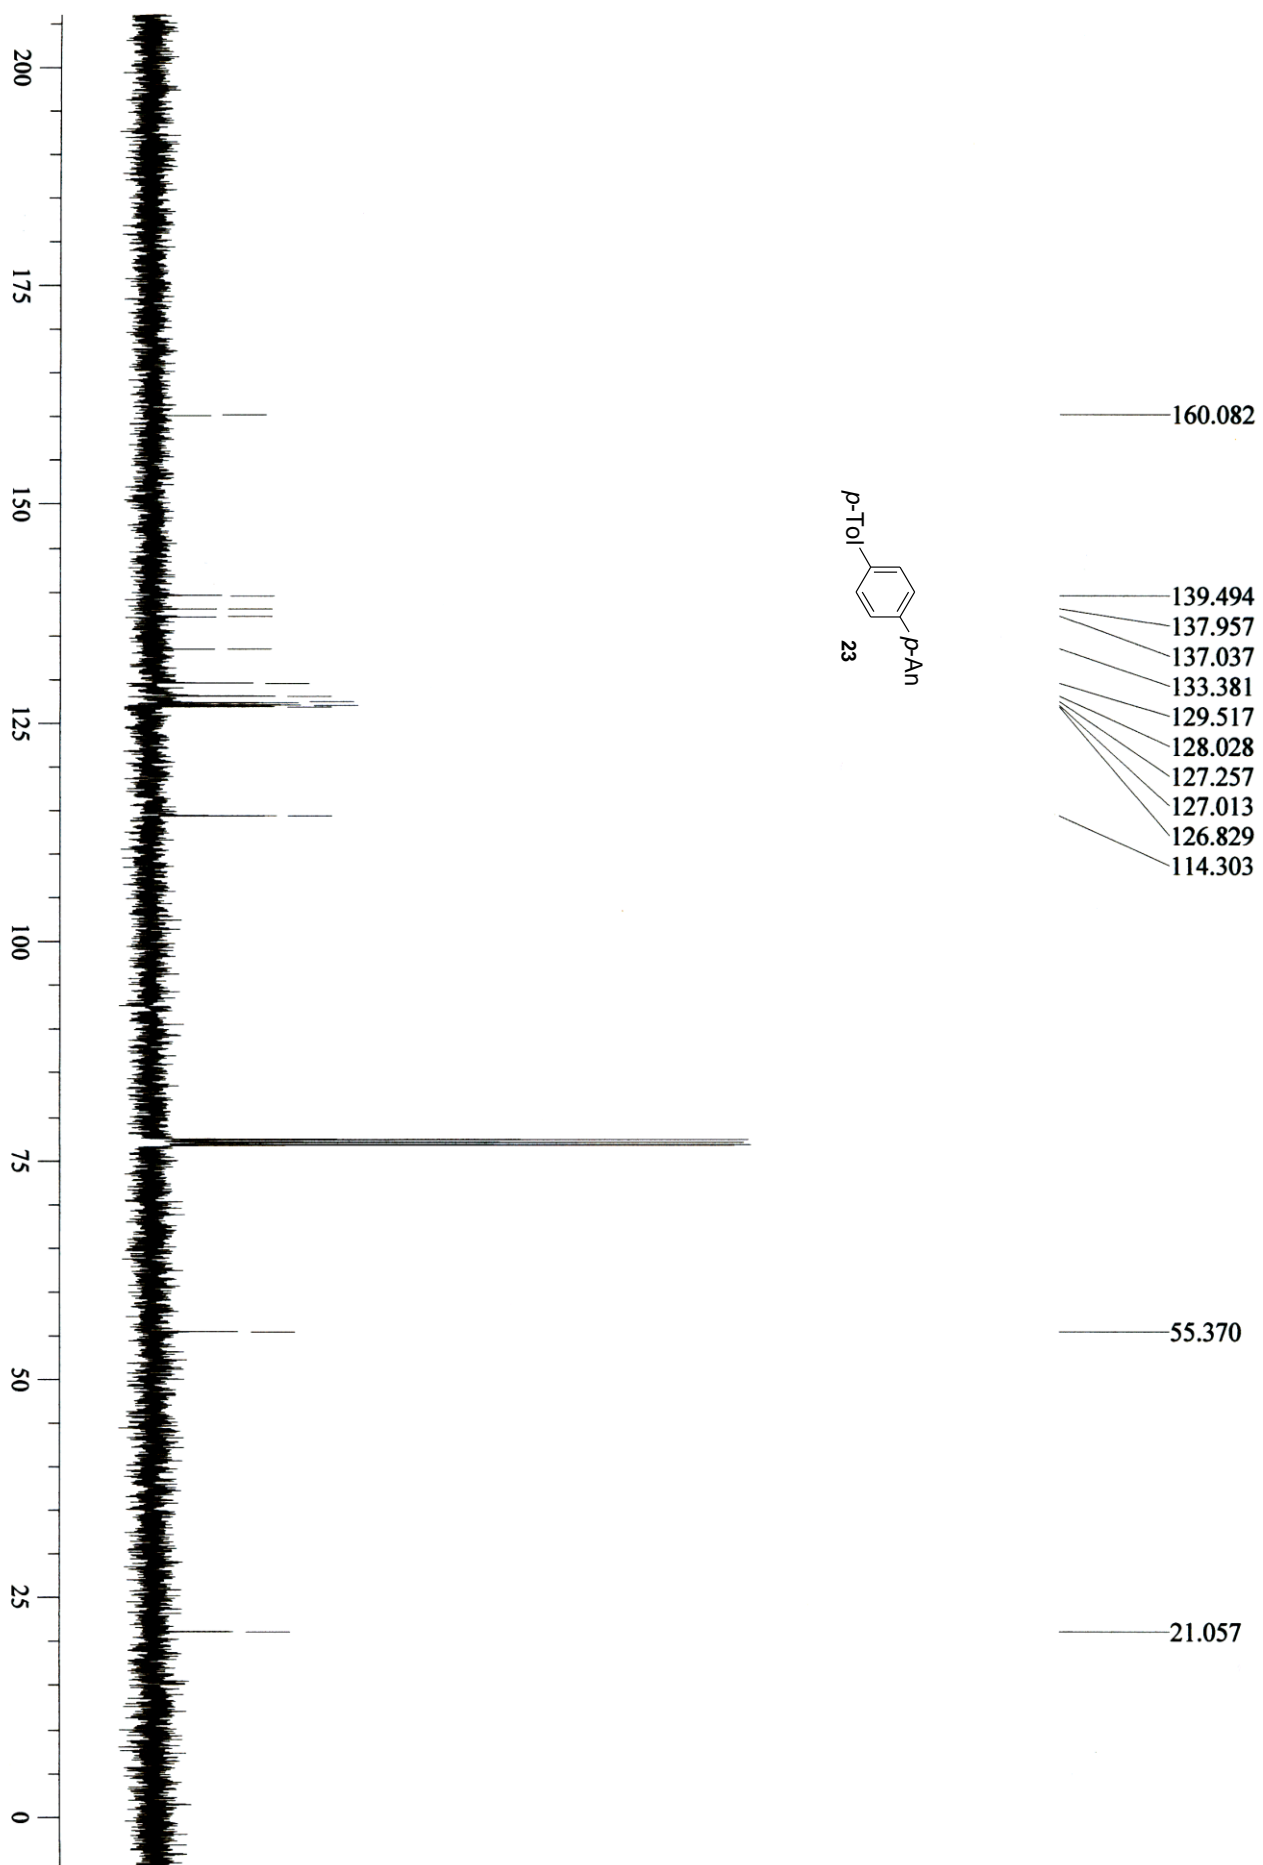

160.082

139.494

137.957

137.037

133.381

129.517

128.028

127.257

127.013

126.829

114.303

55.370

21.057

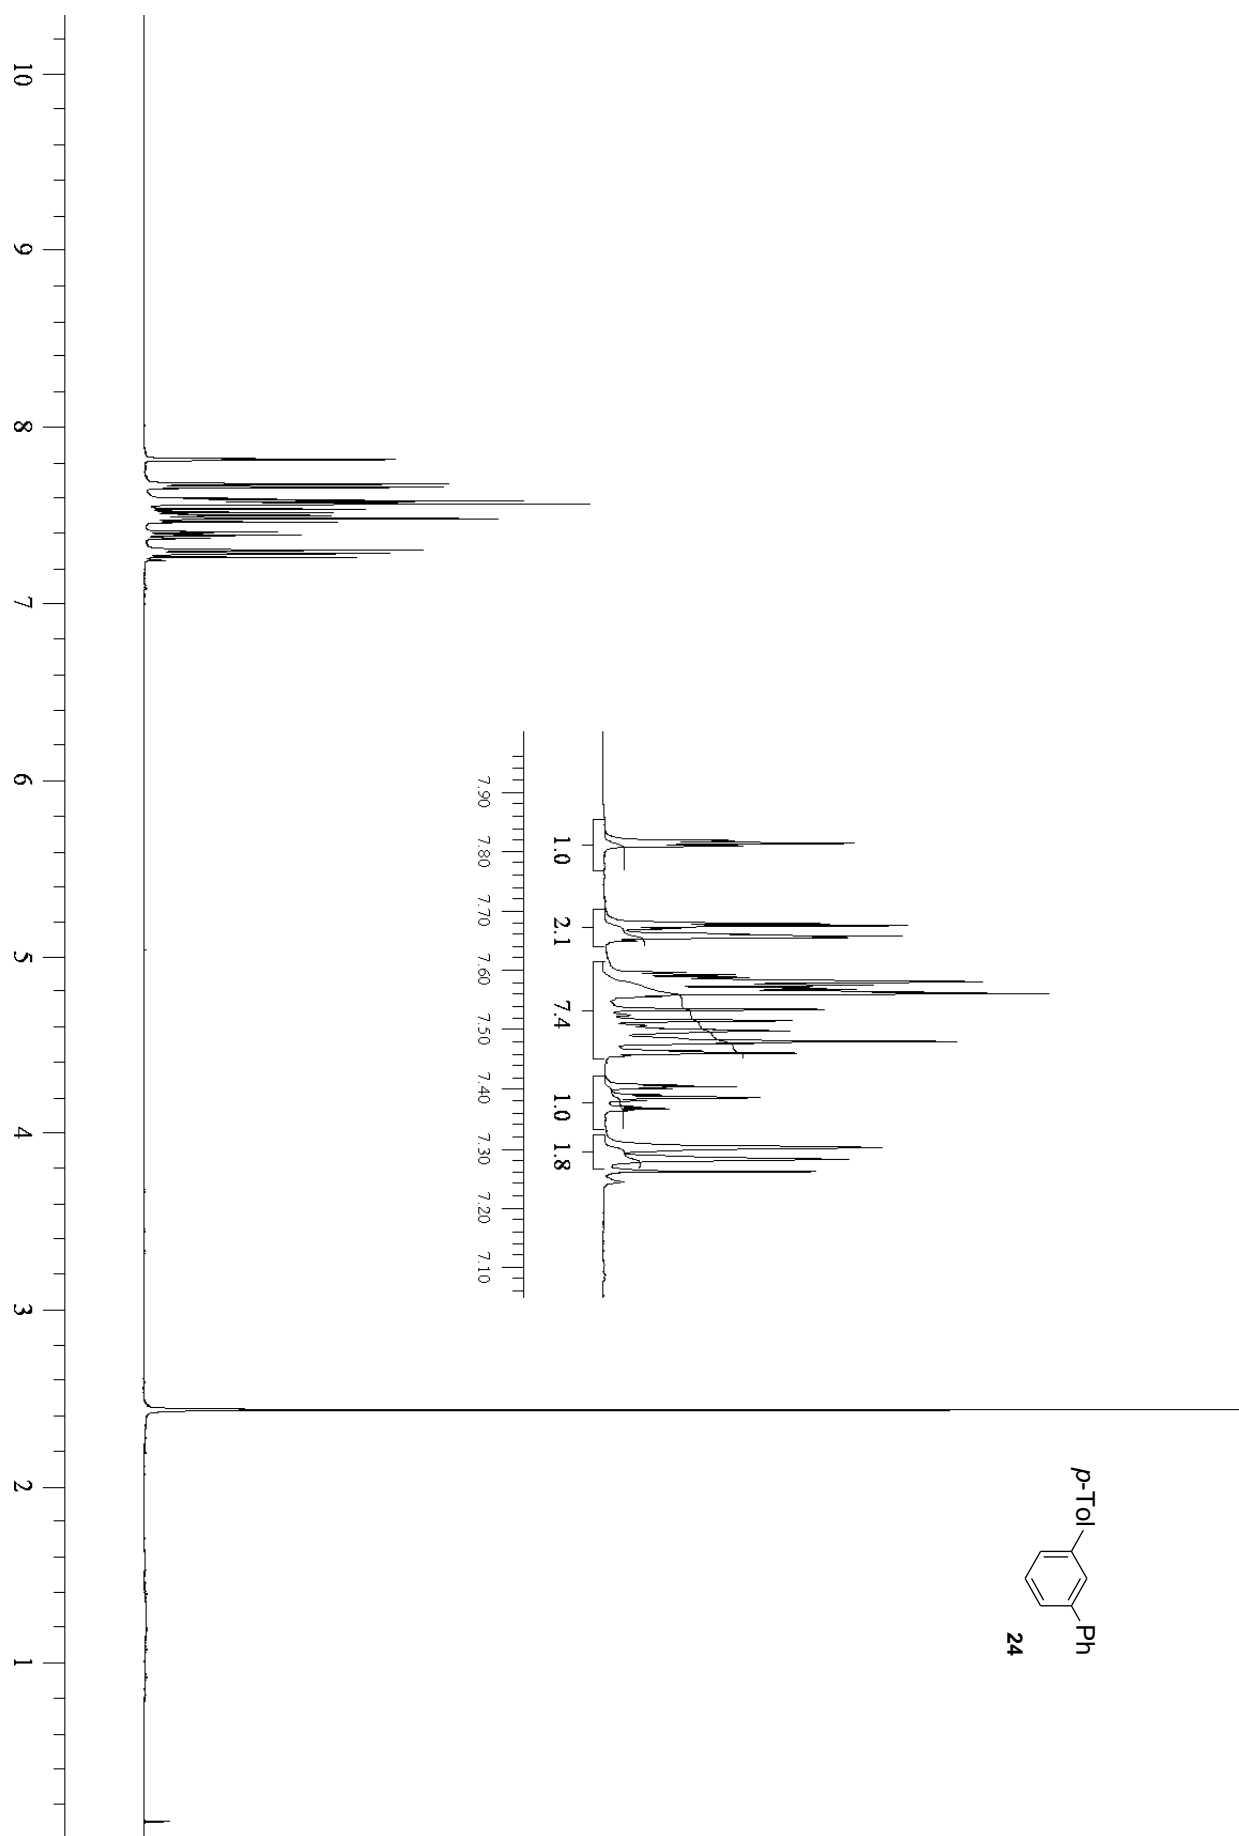

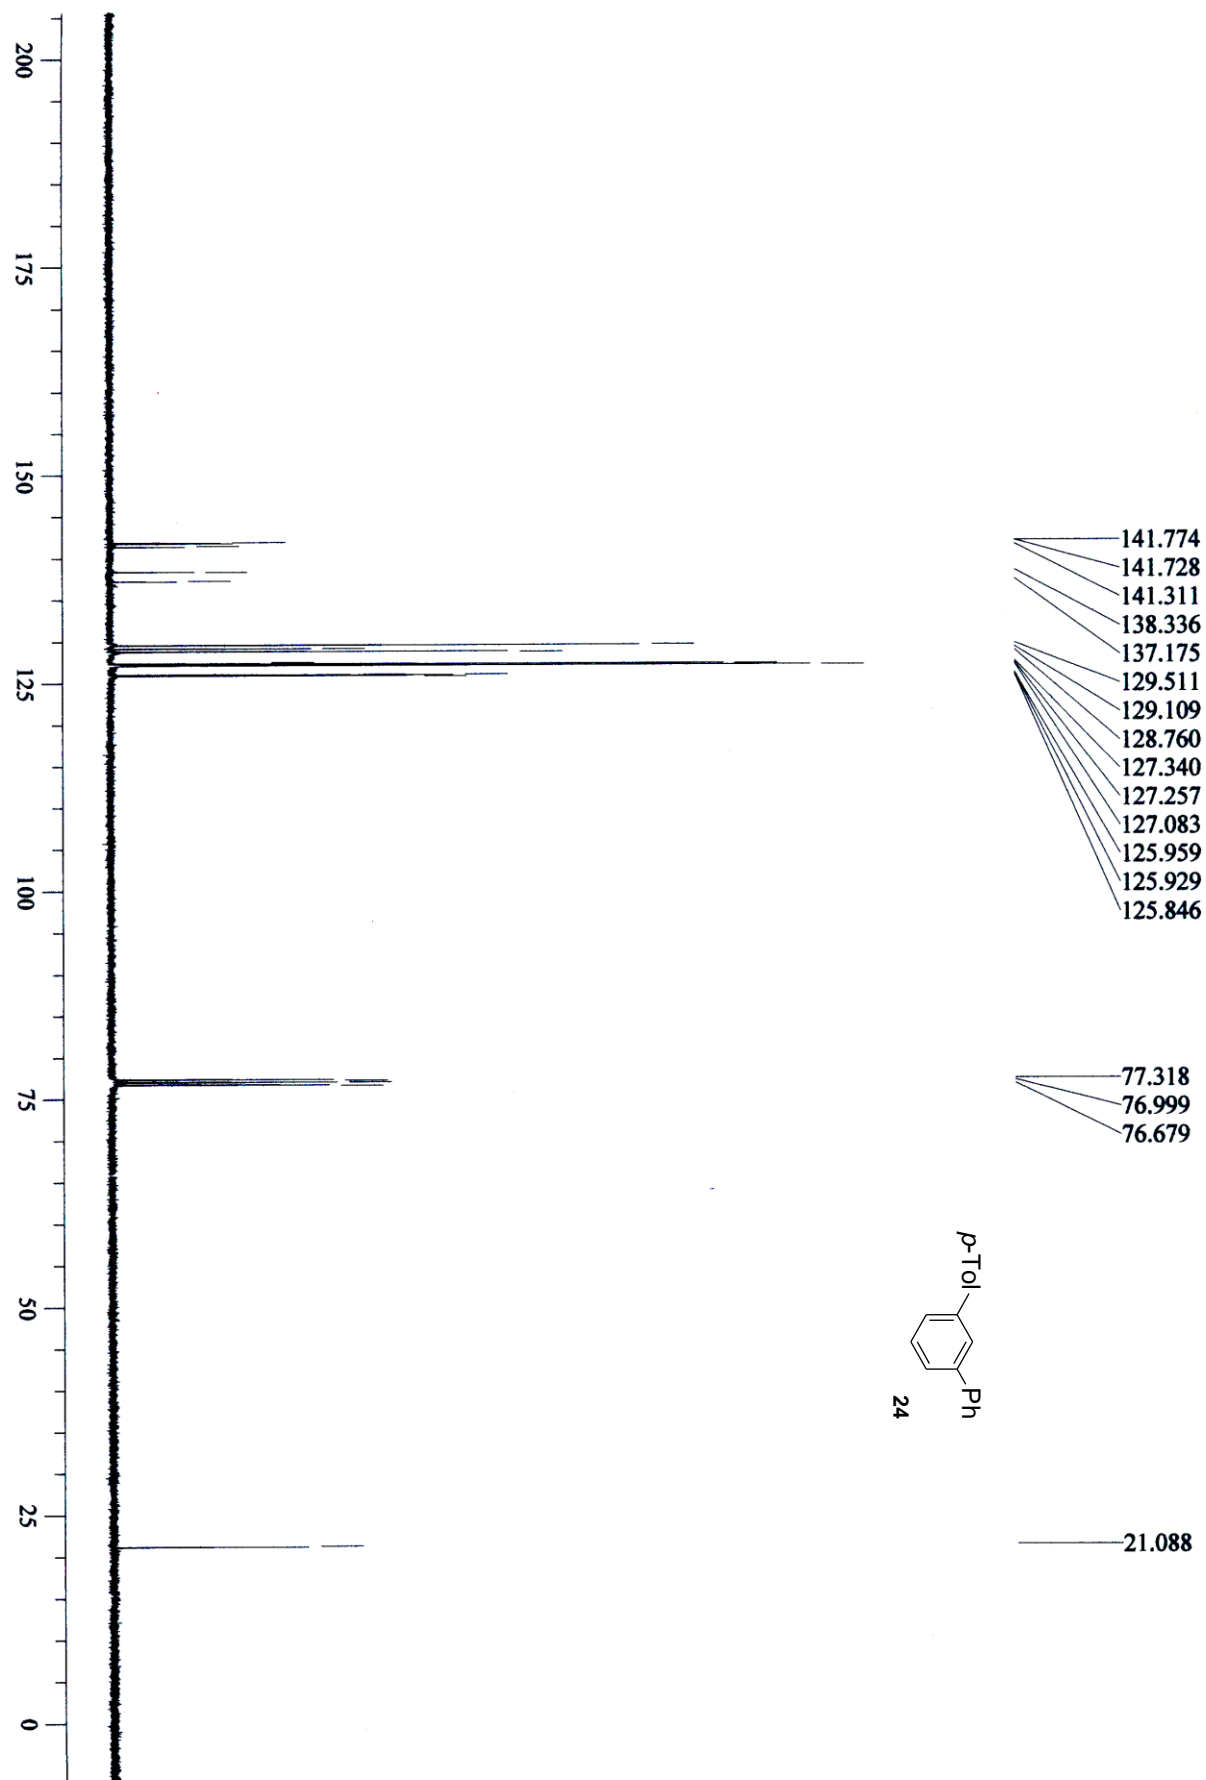

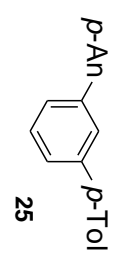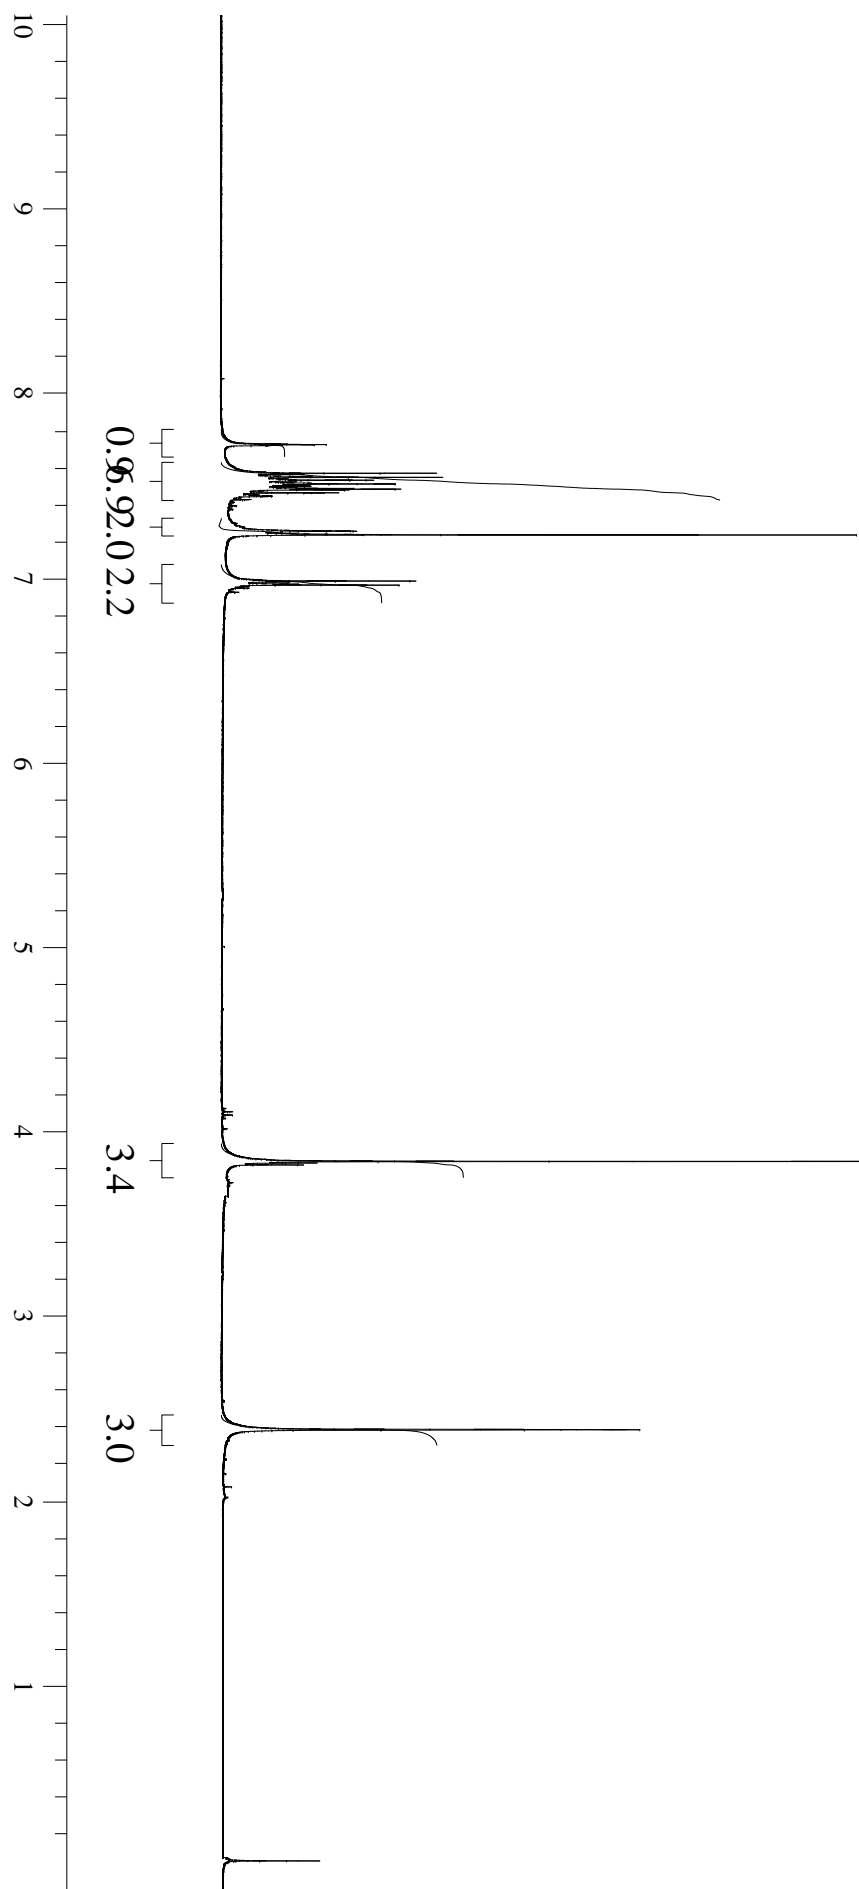

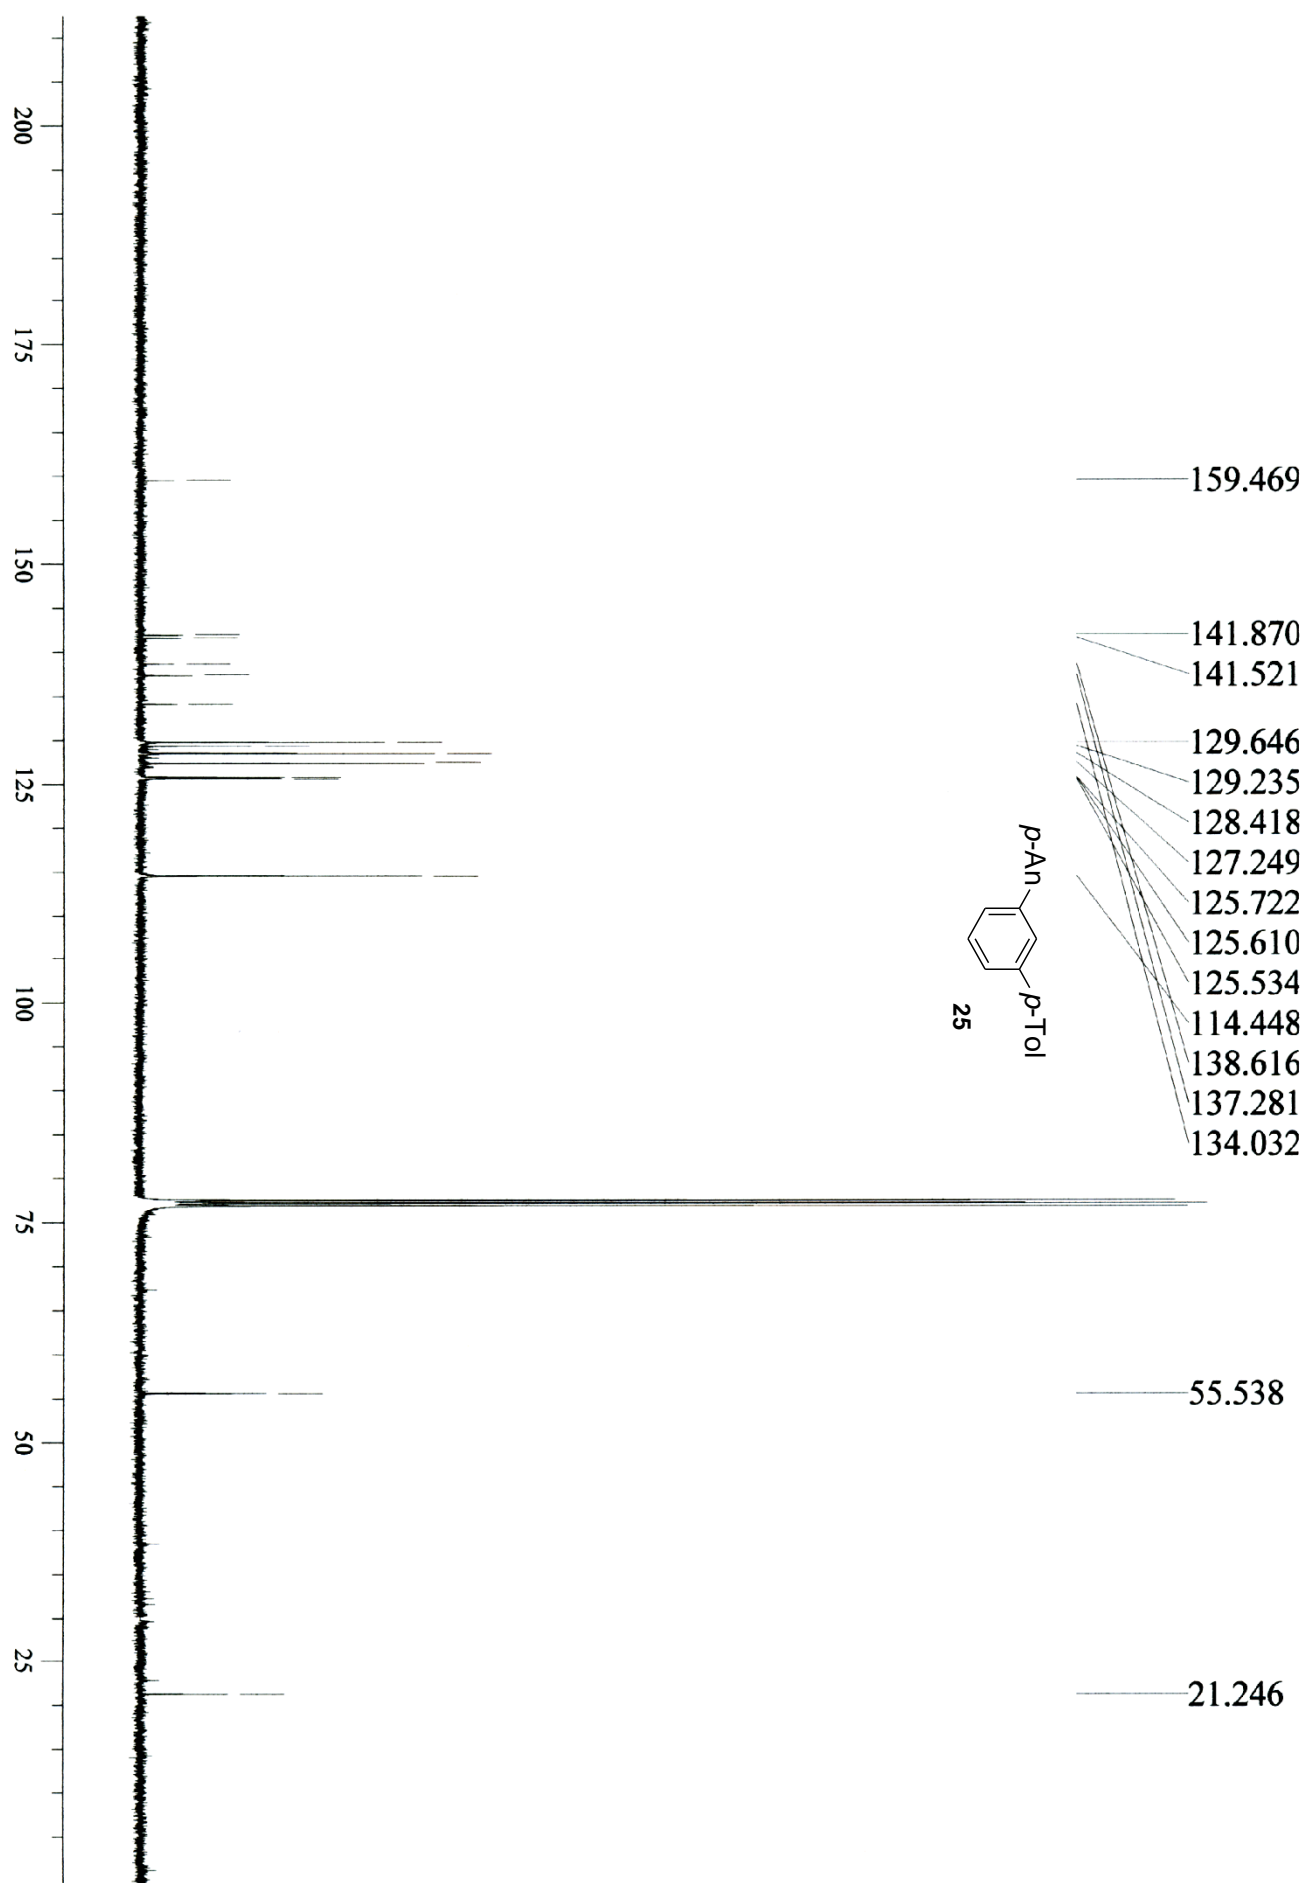

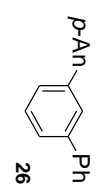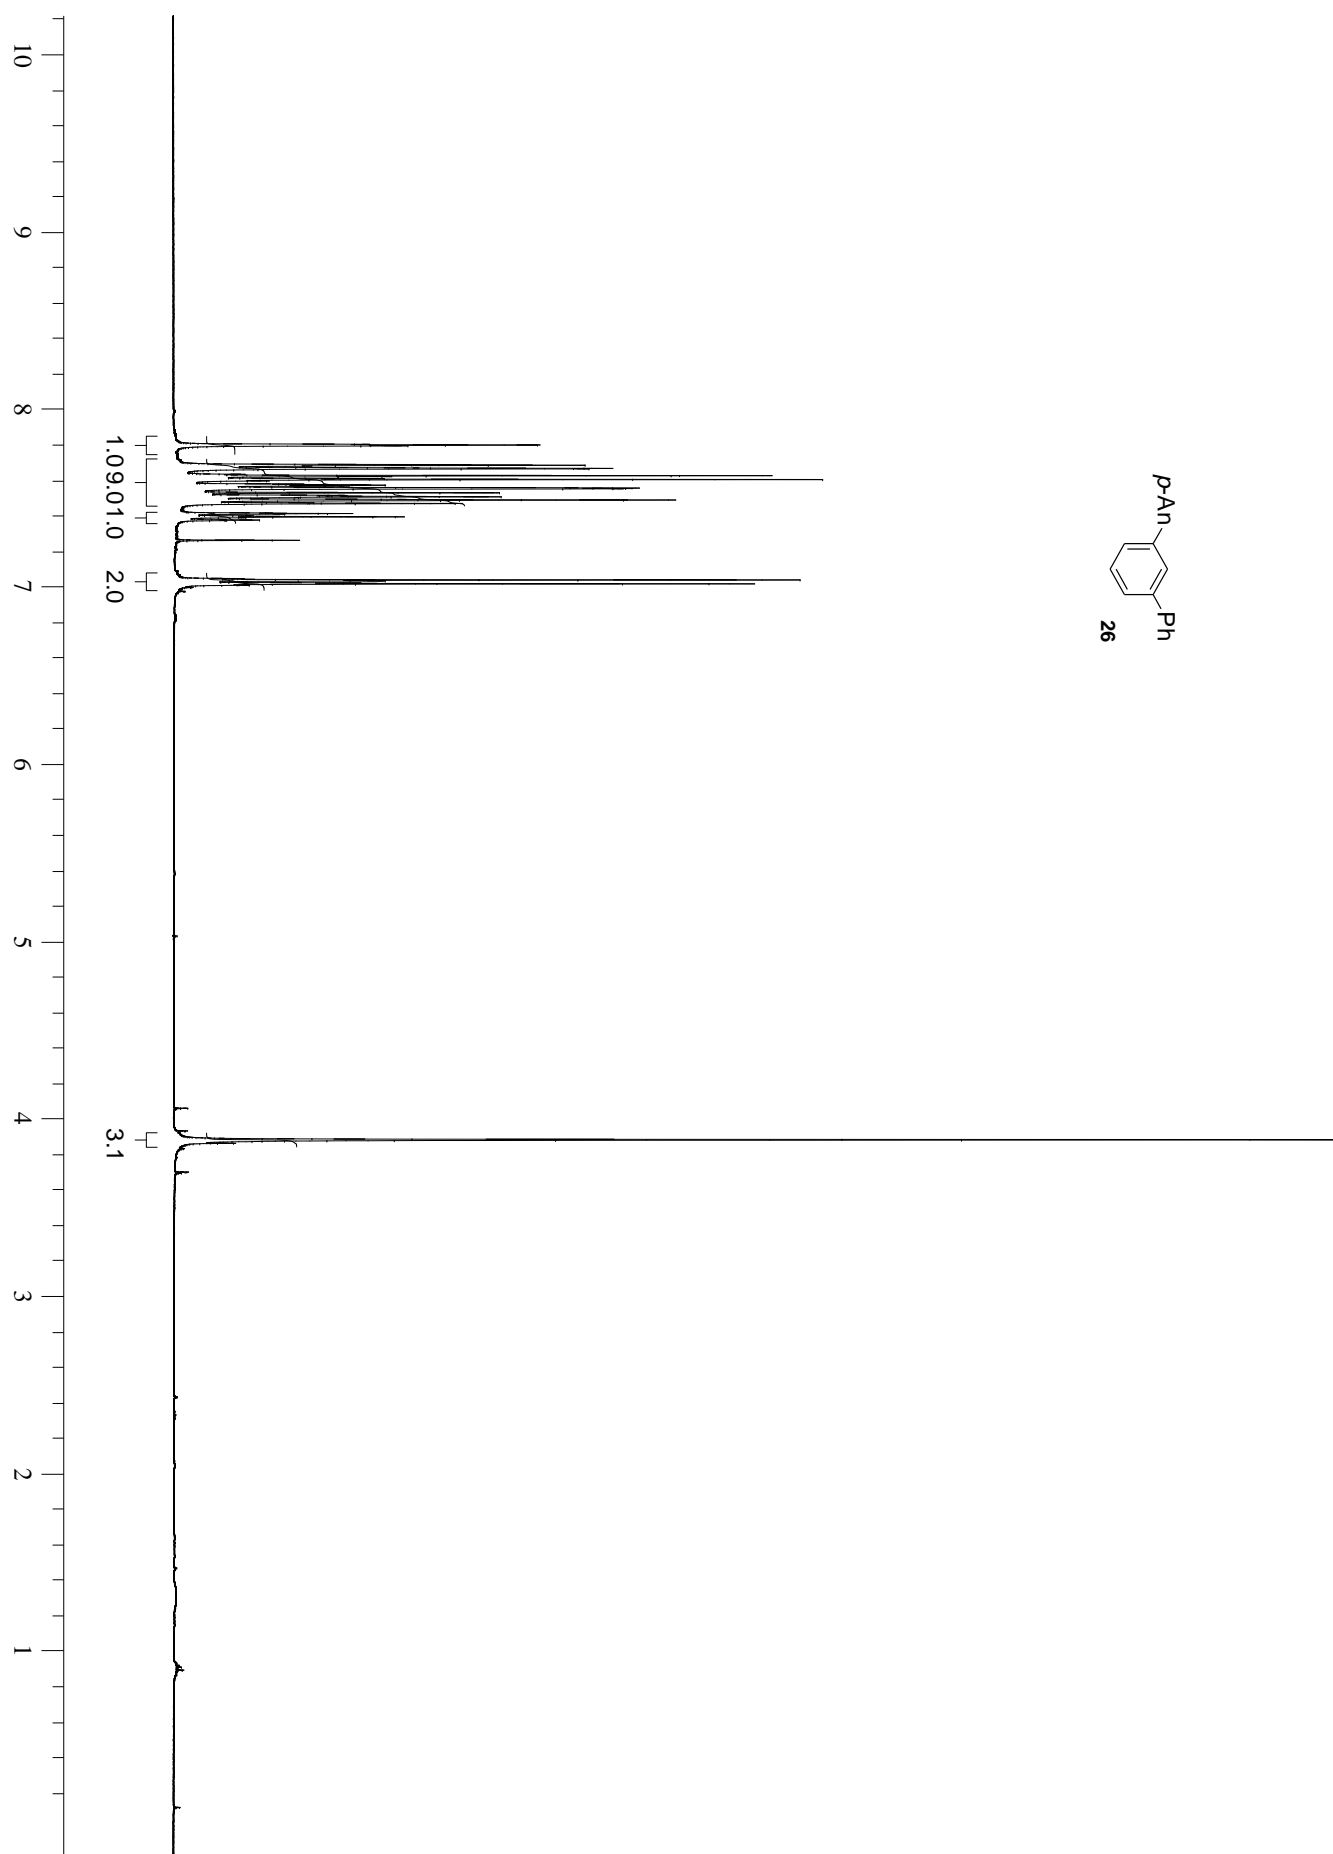



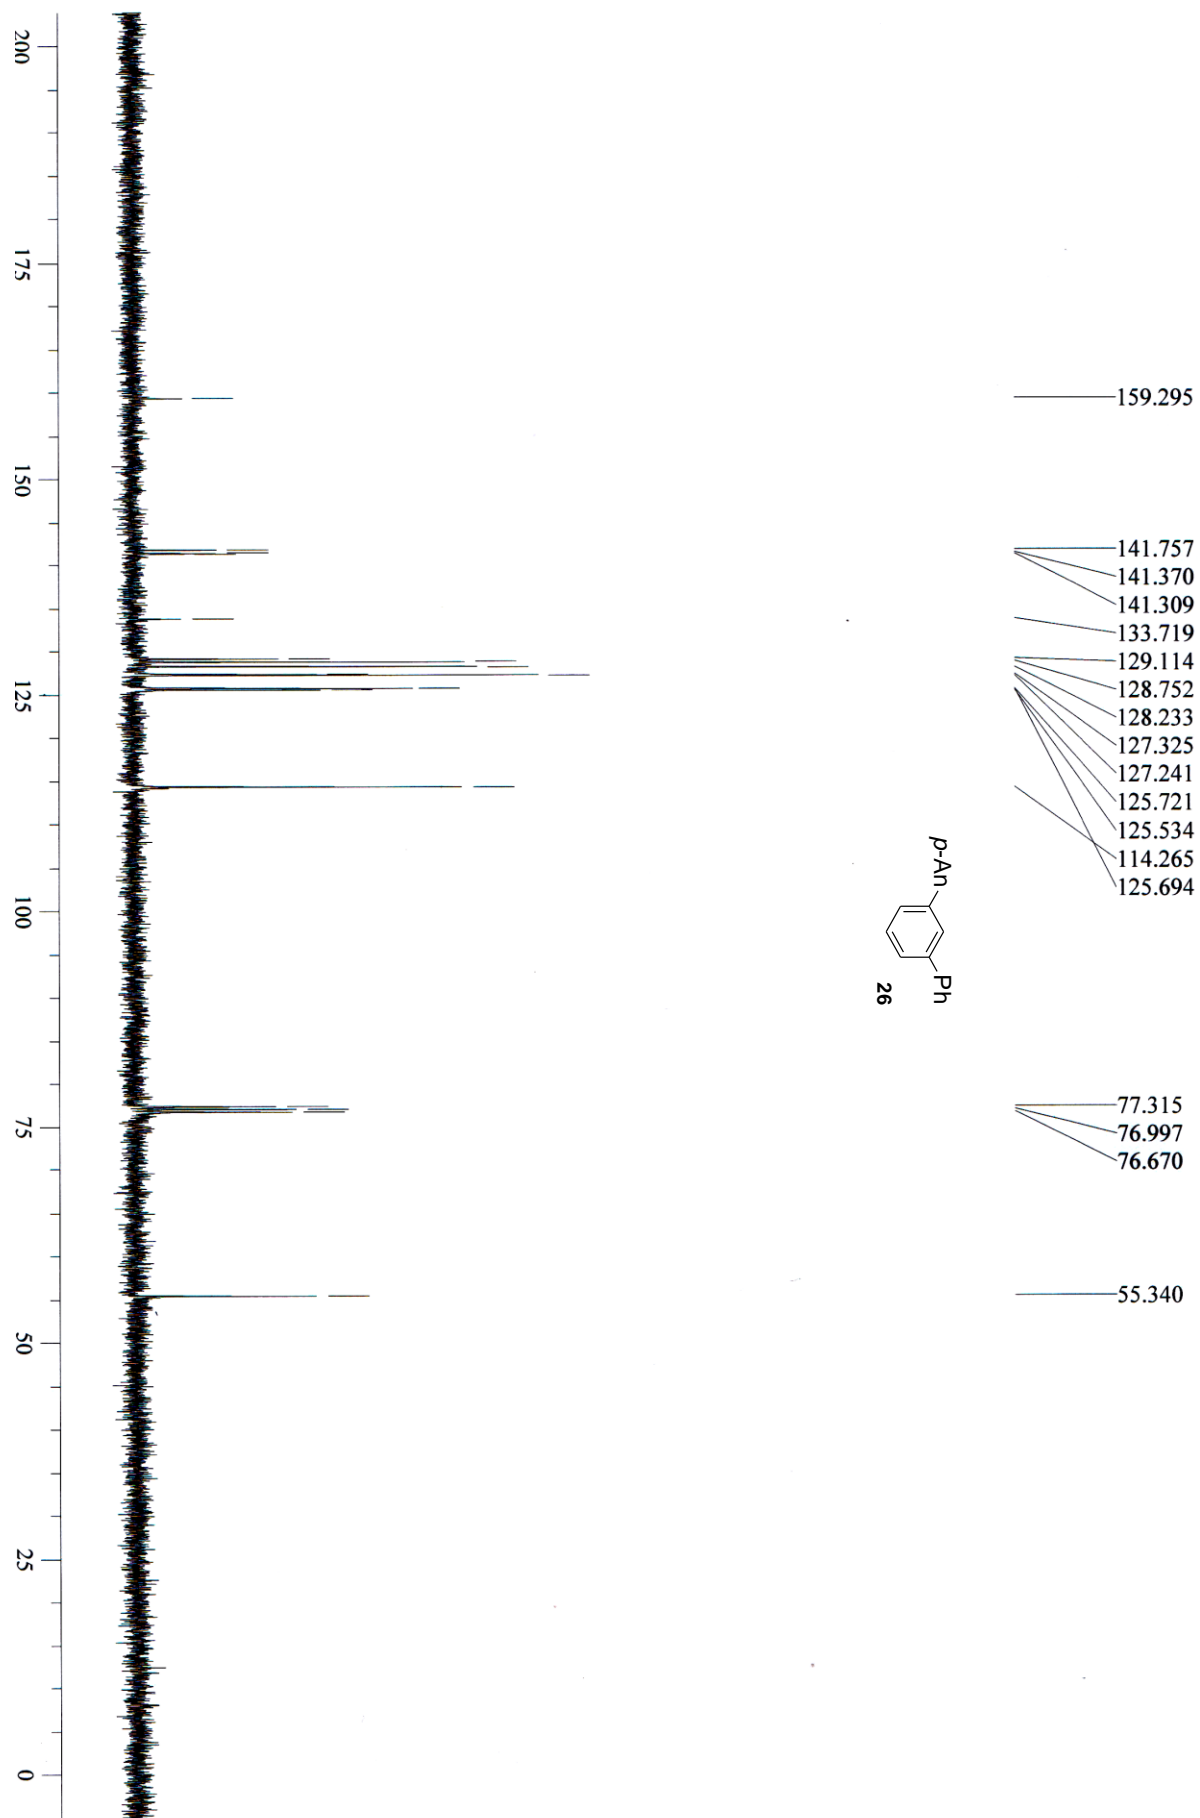

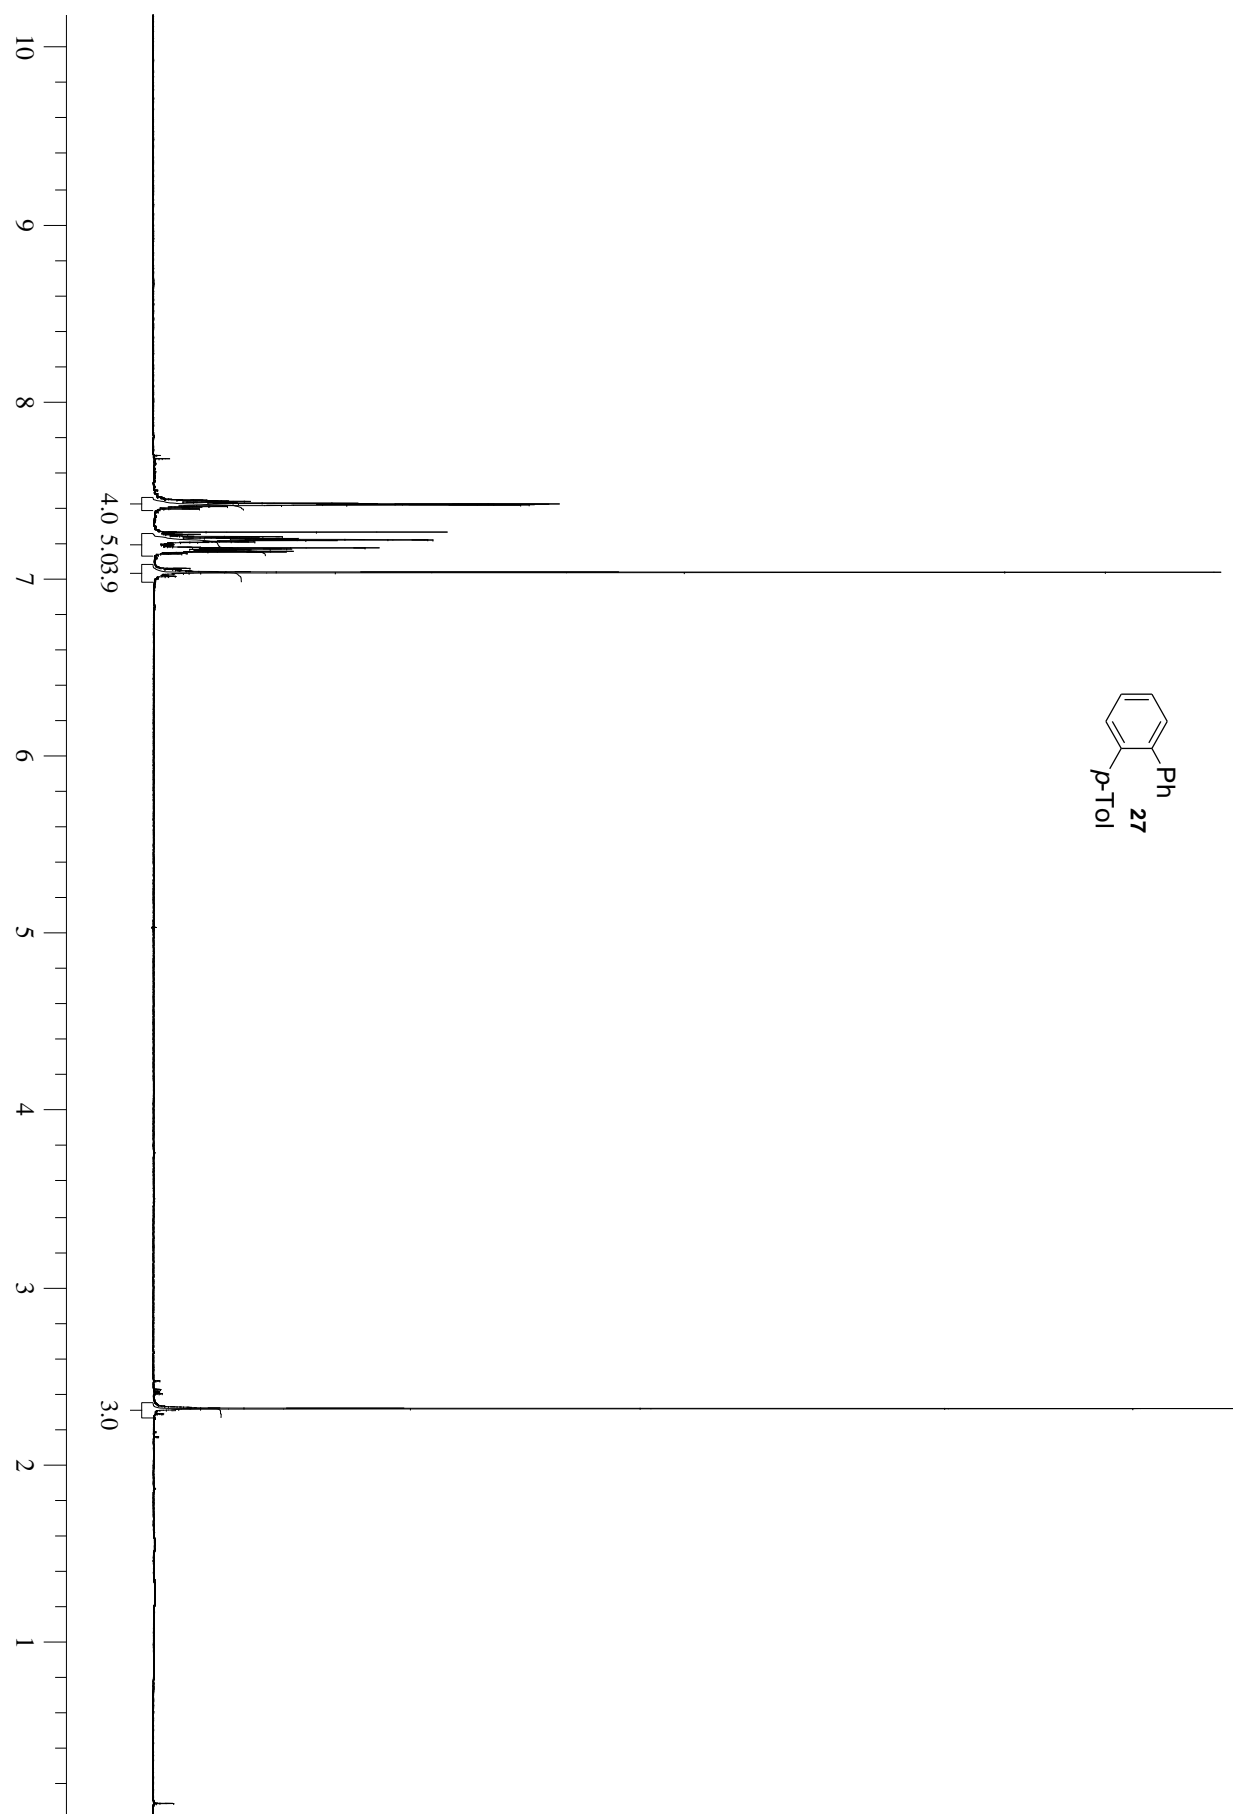

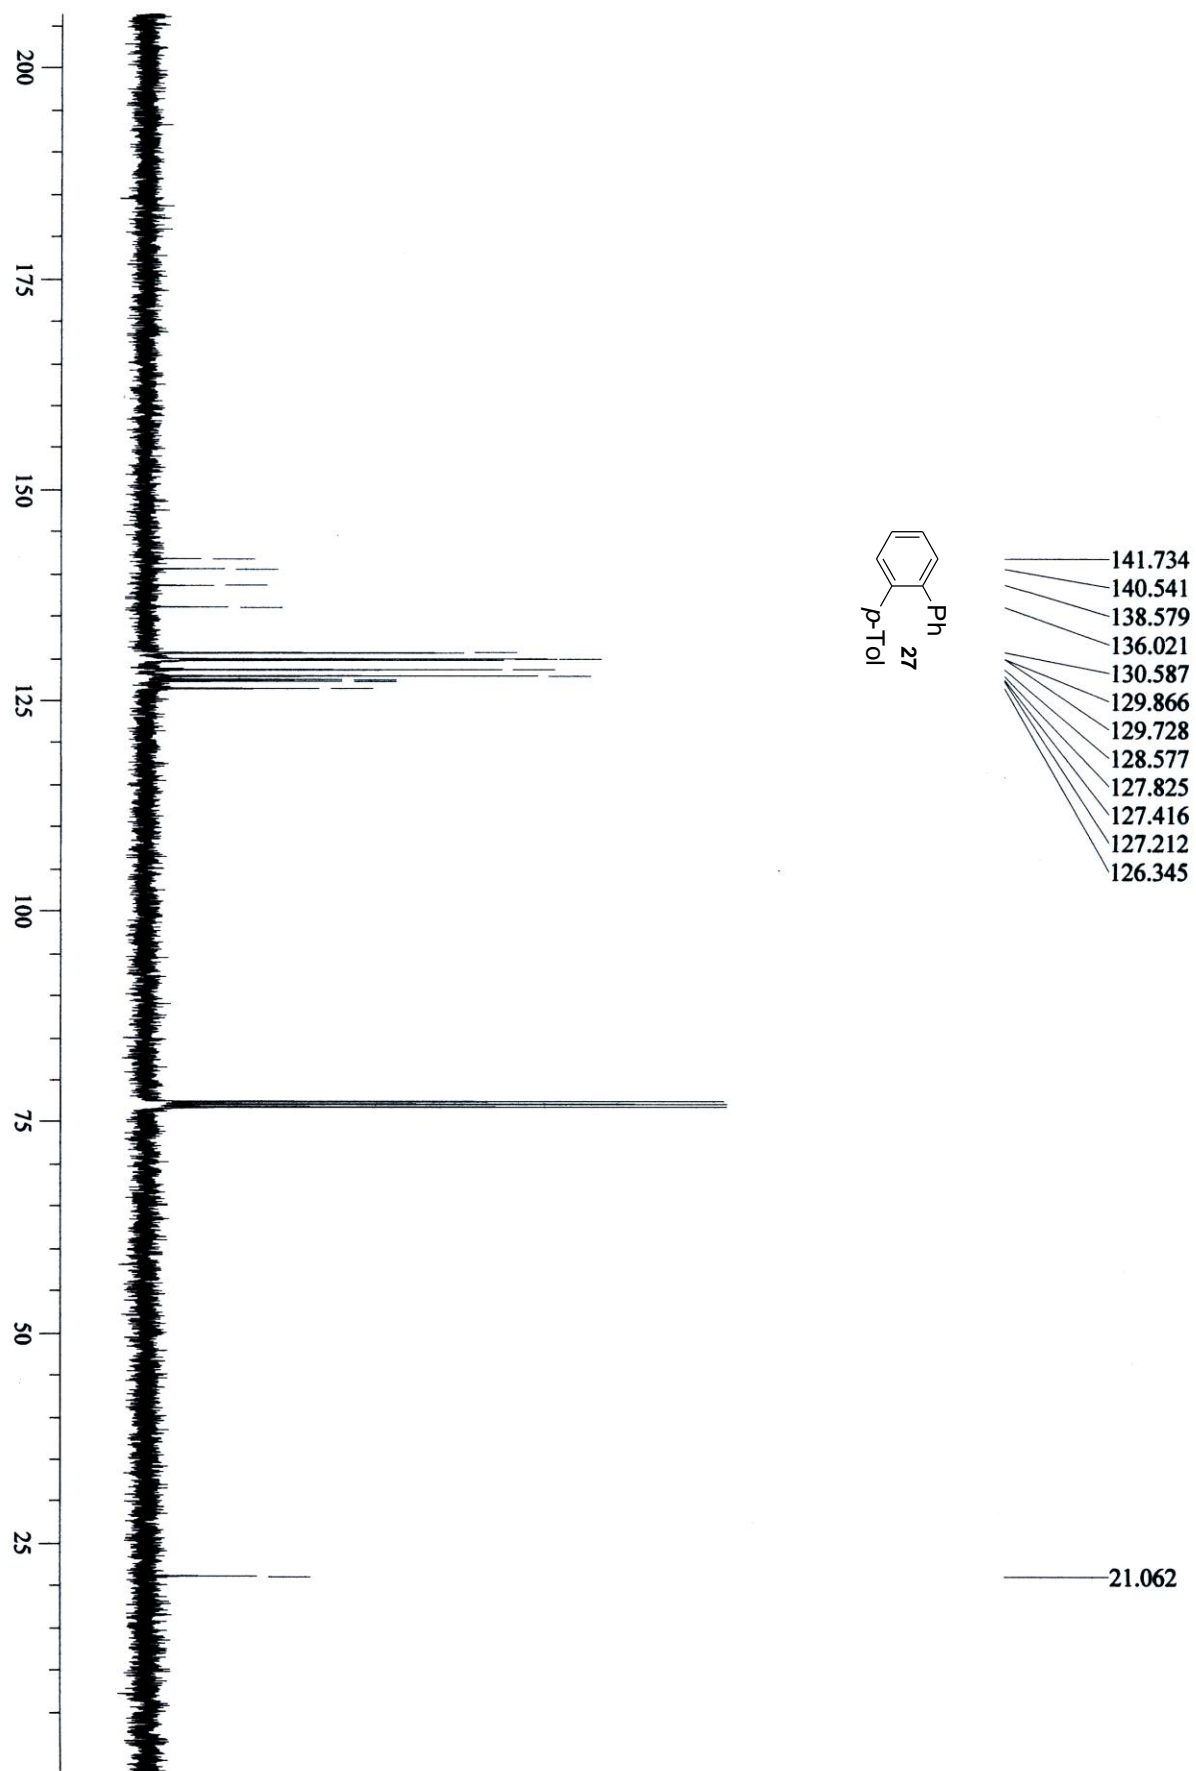



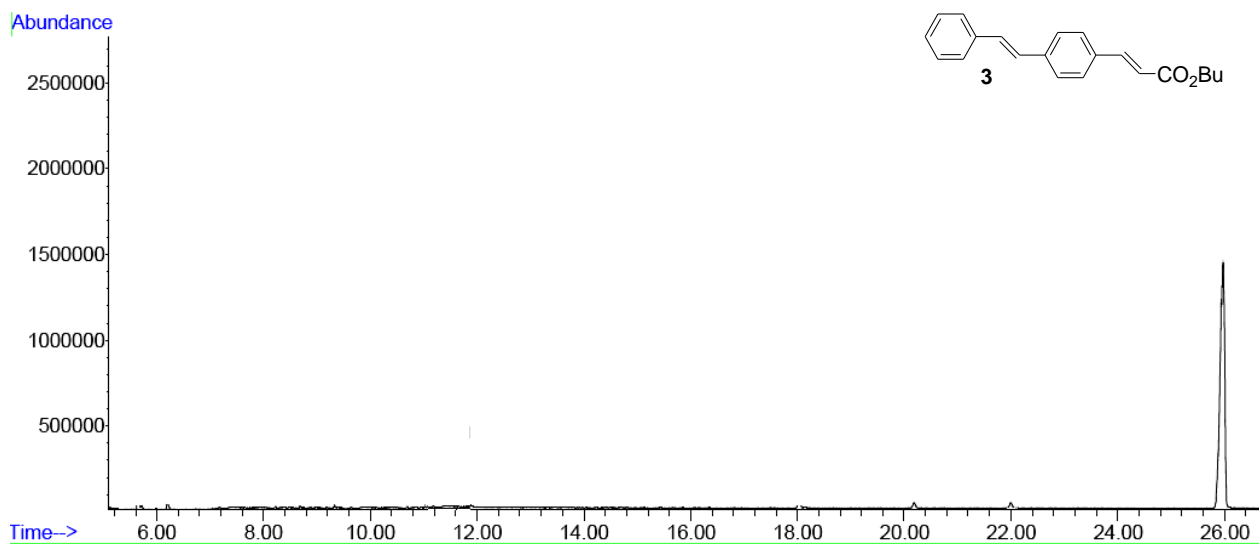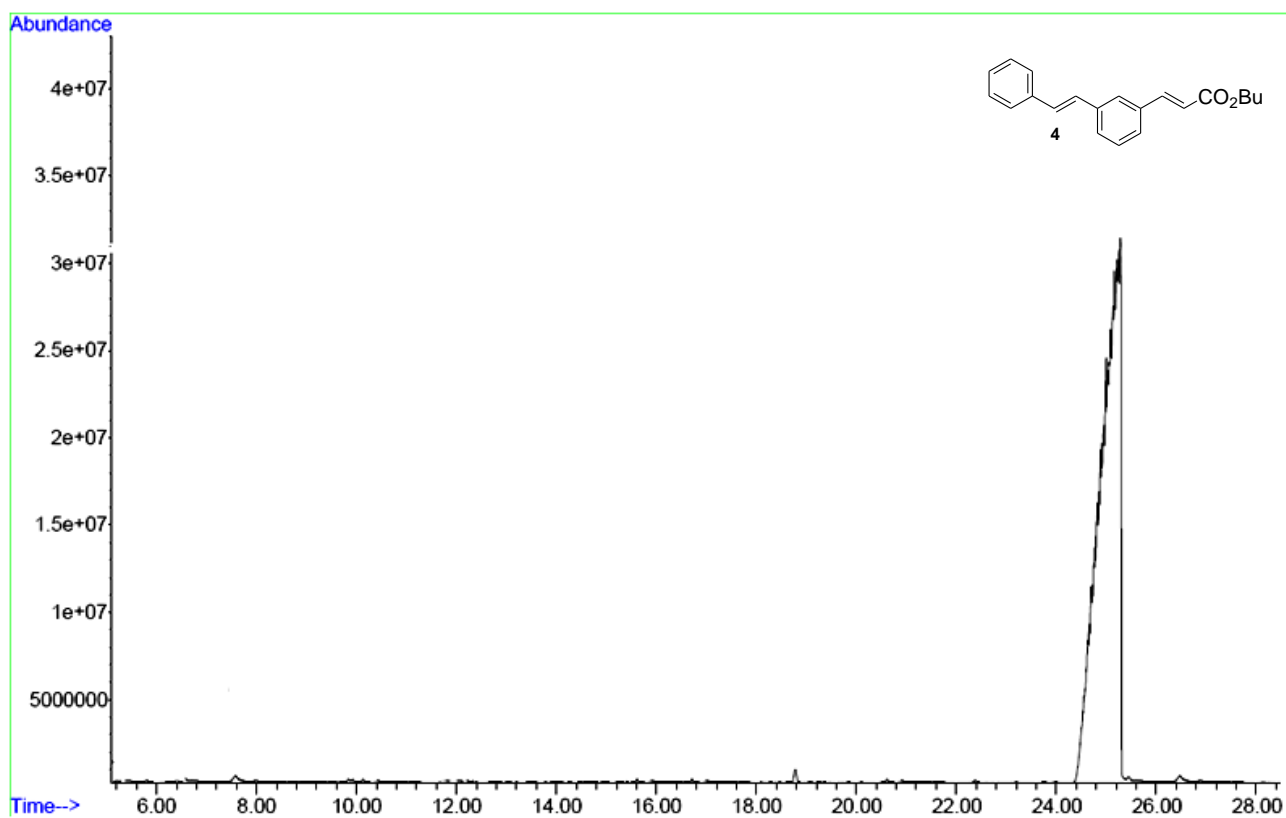

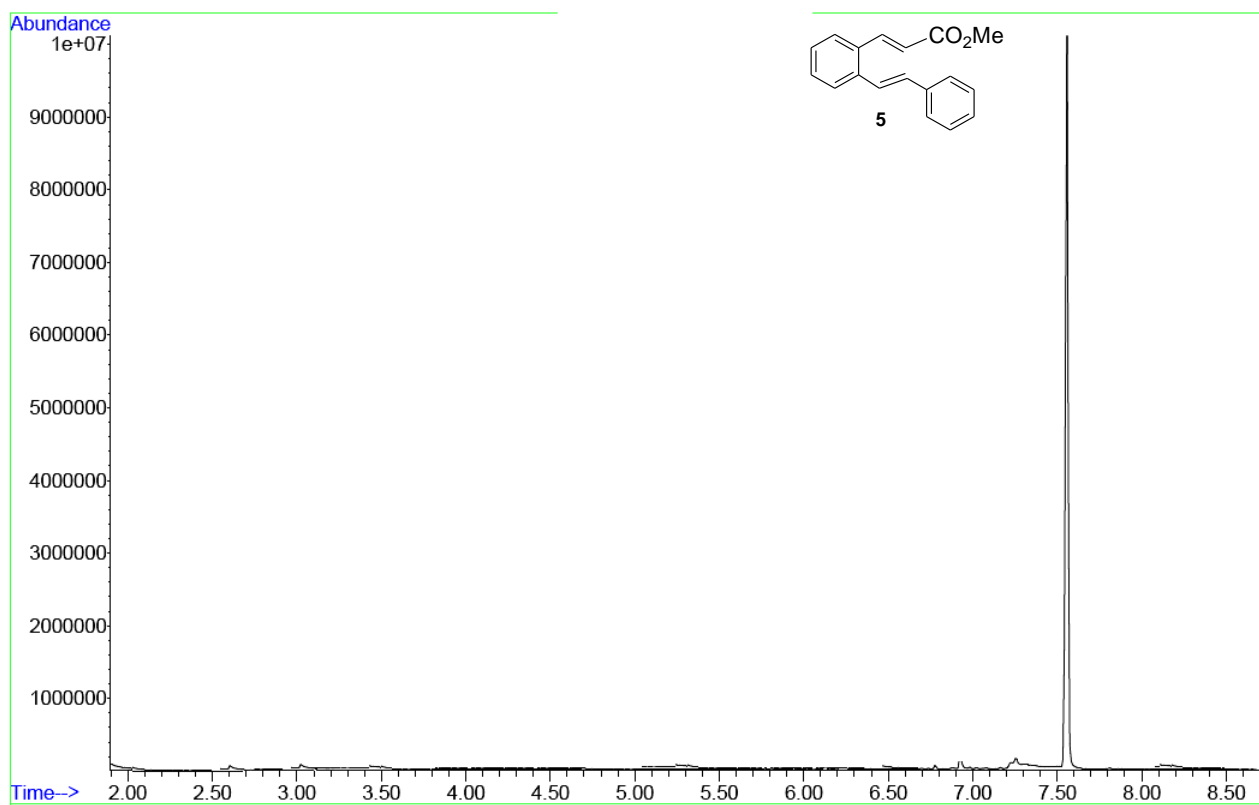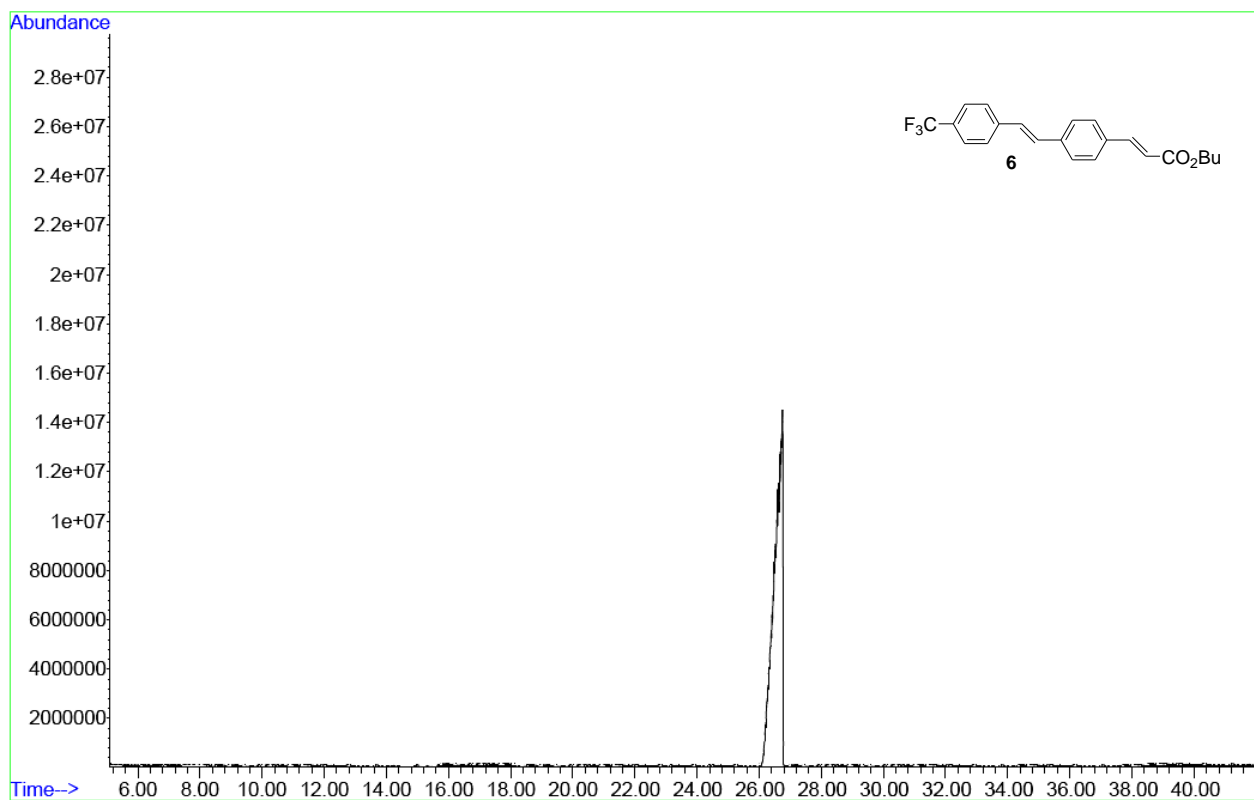

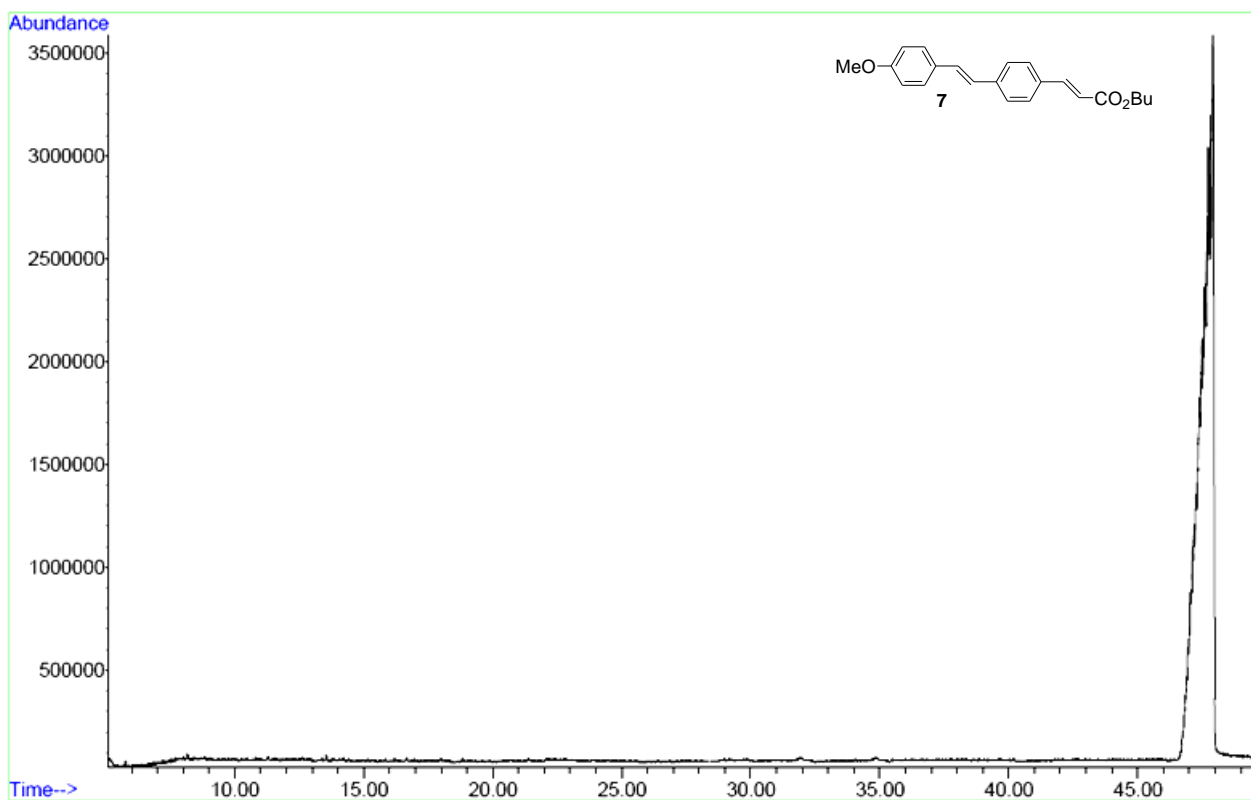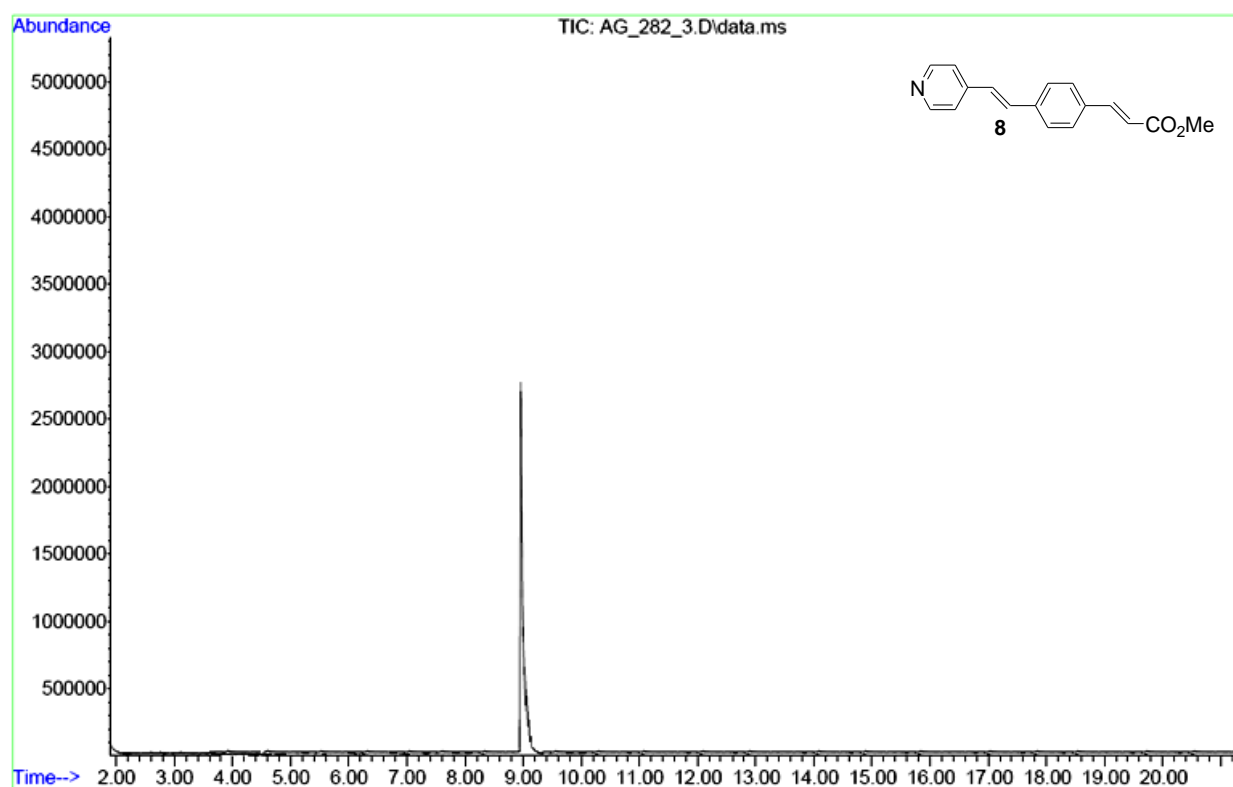

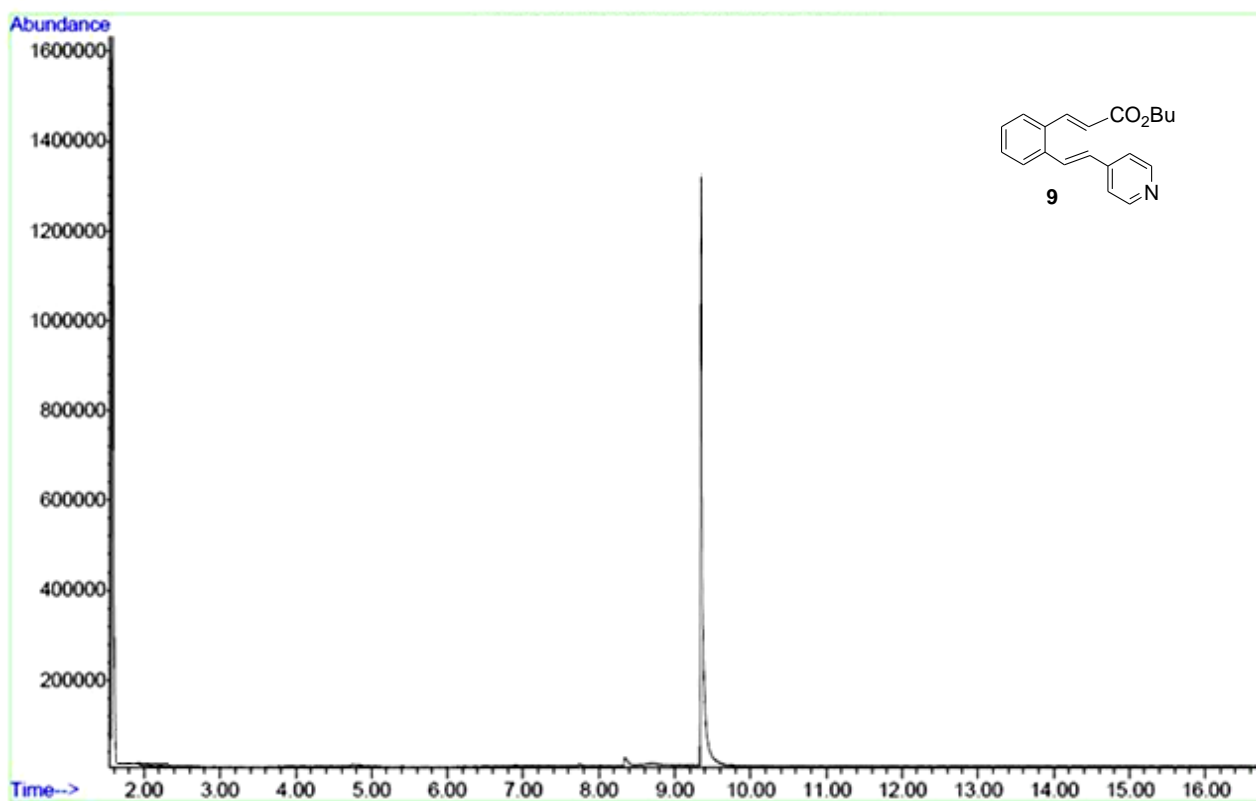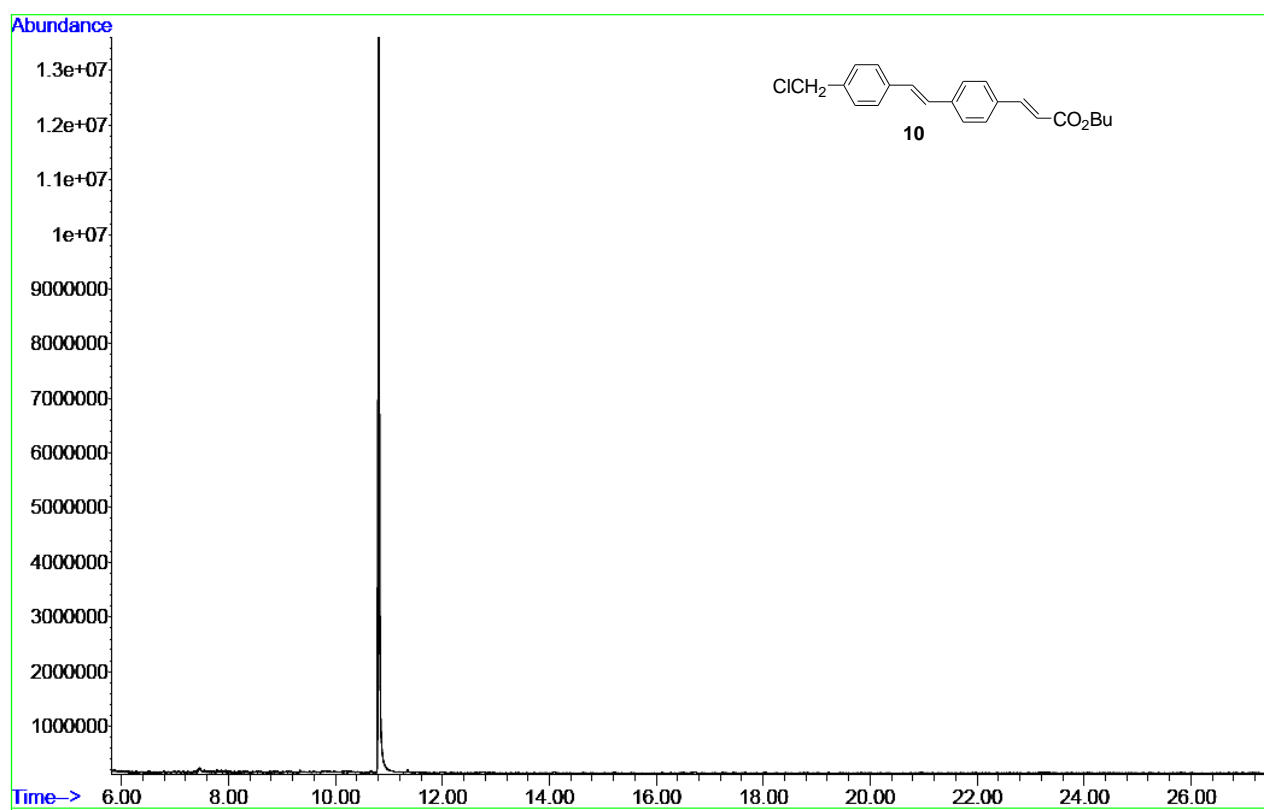



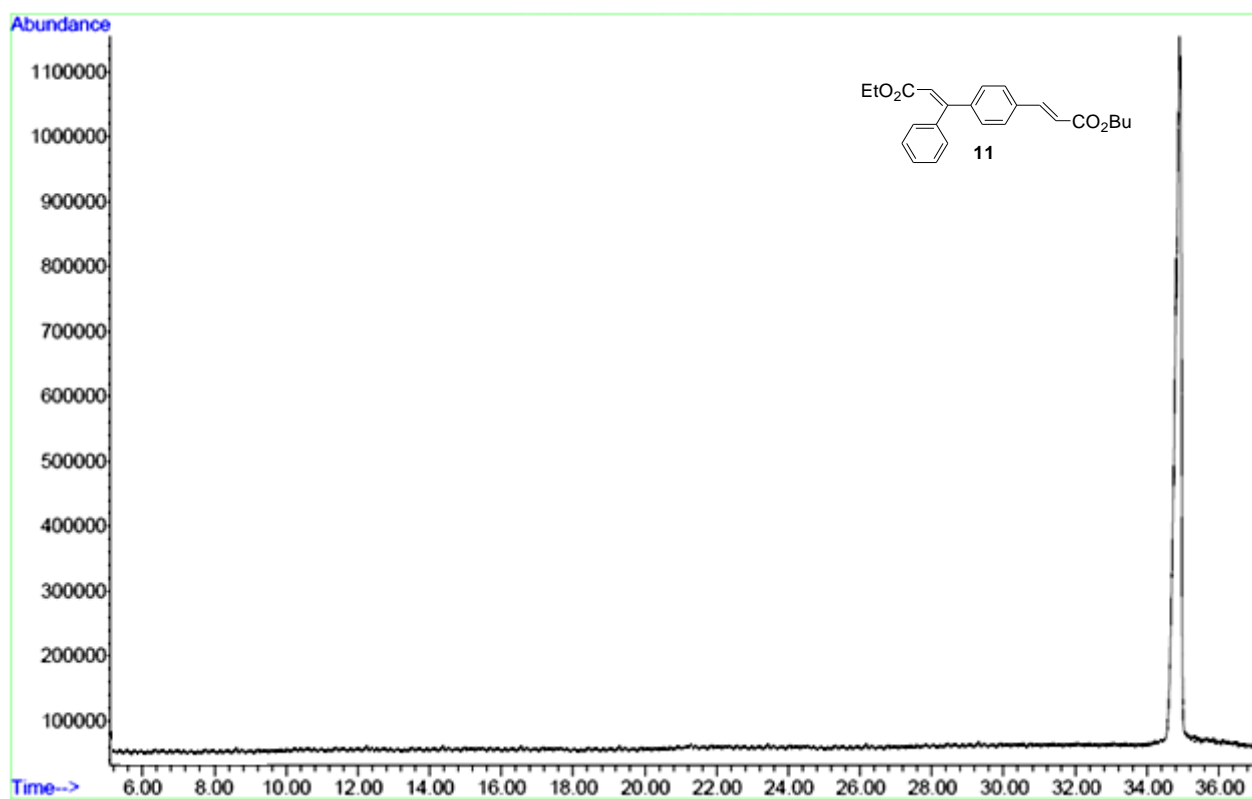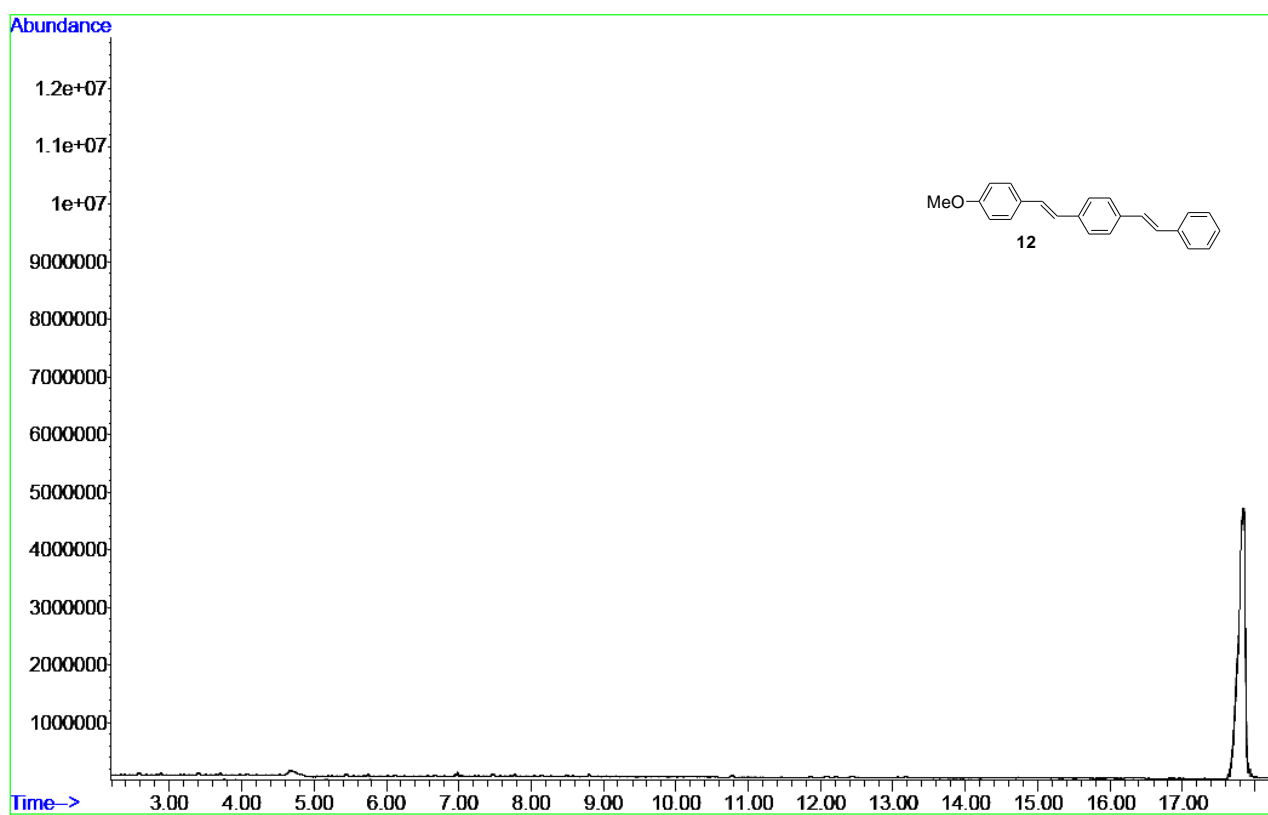

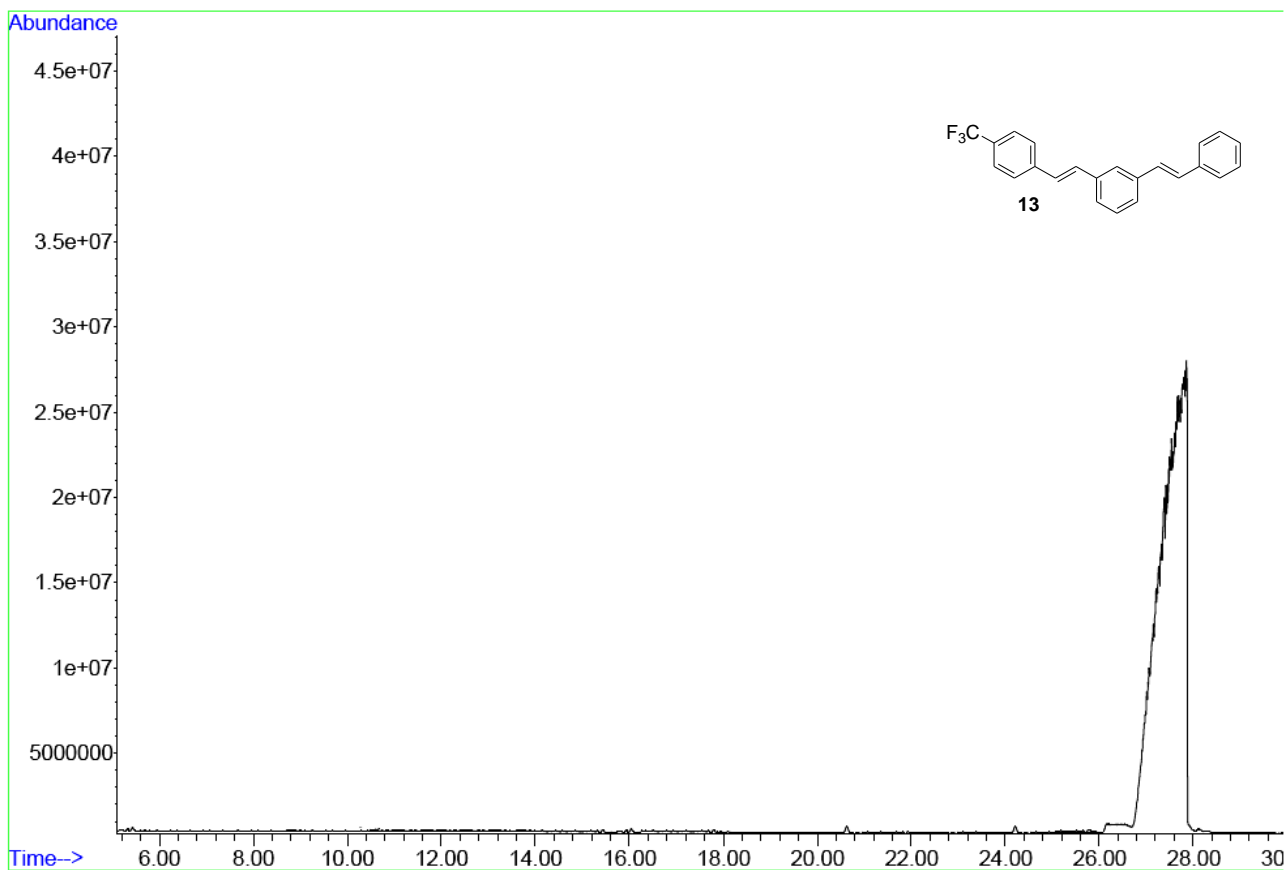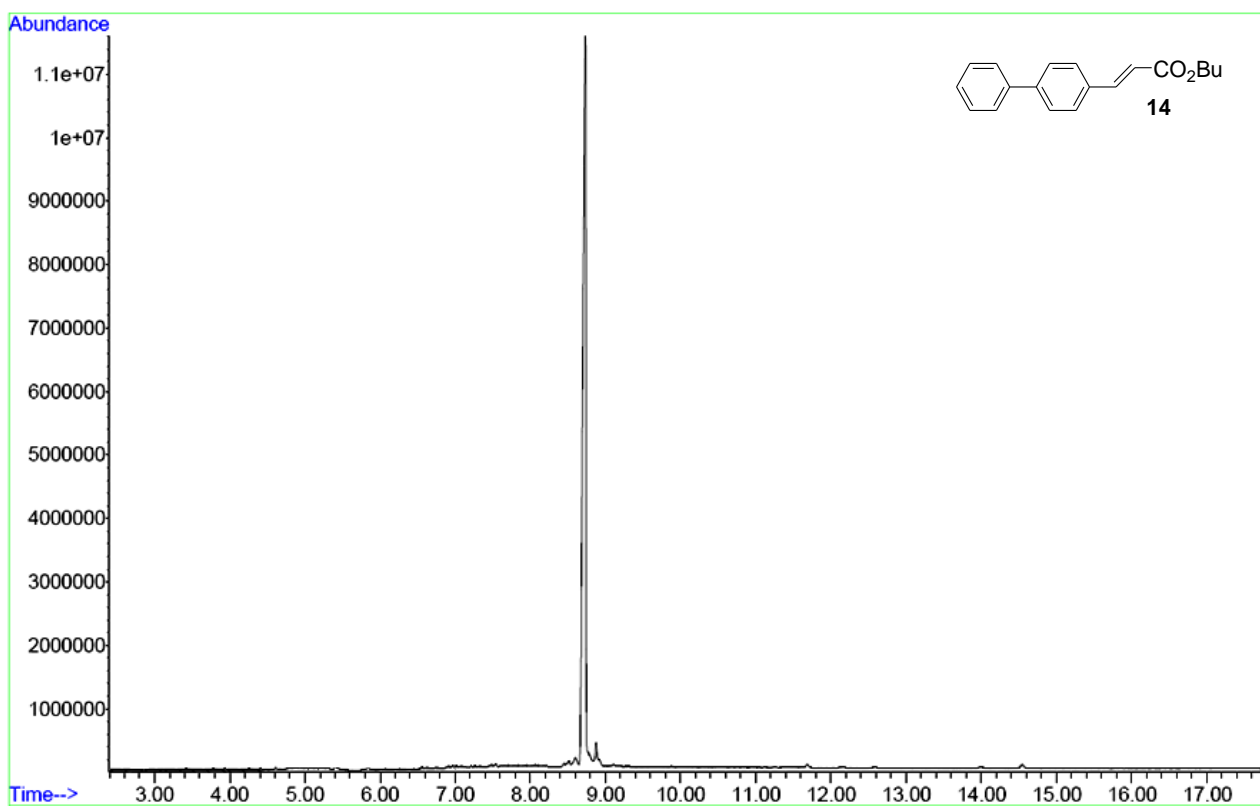

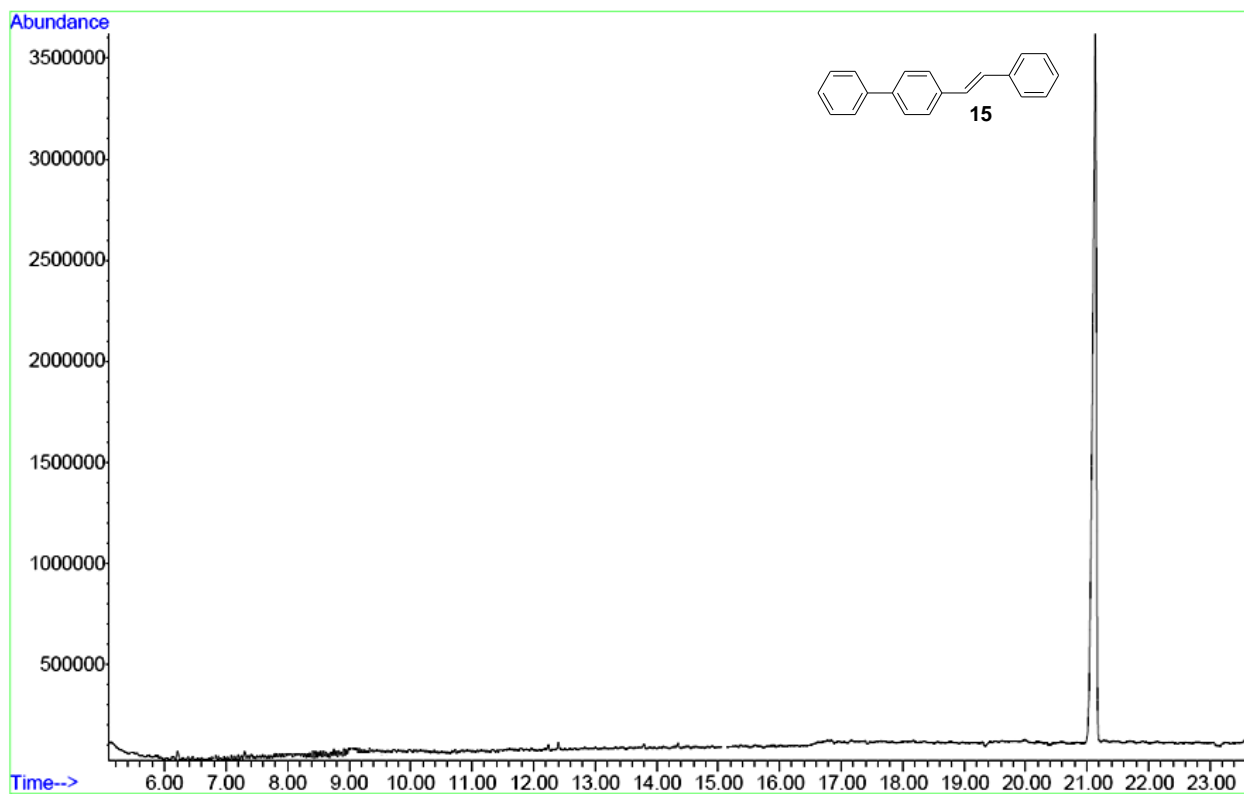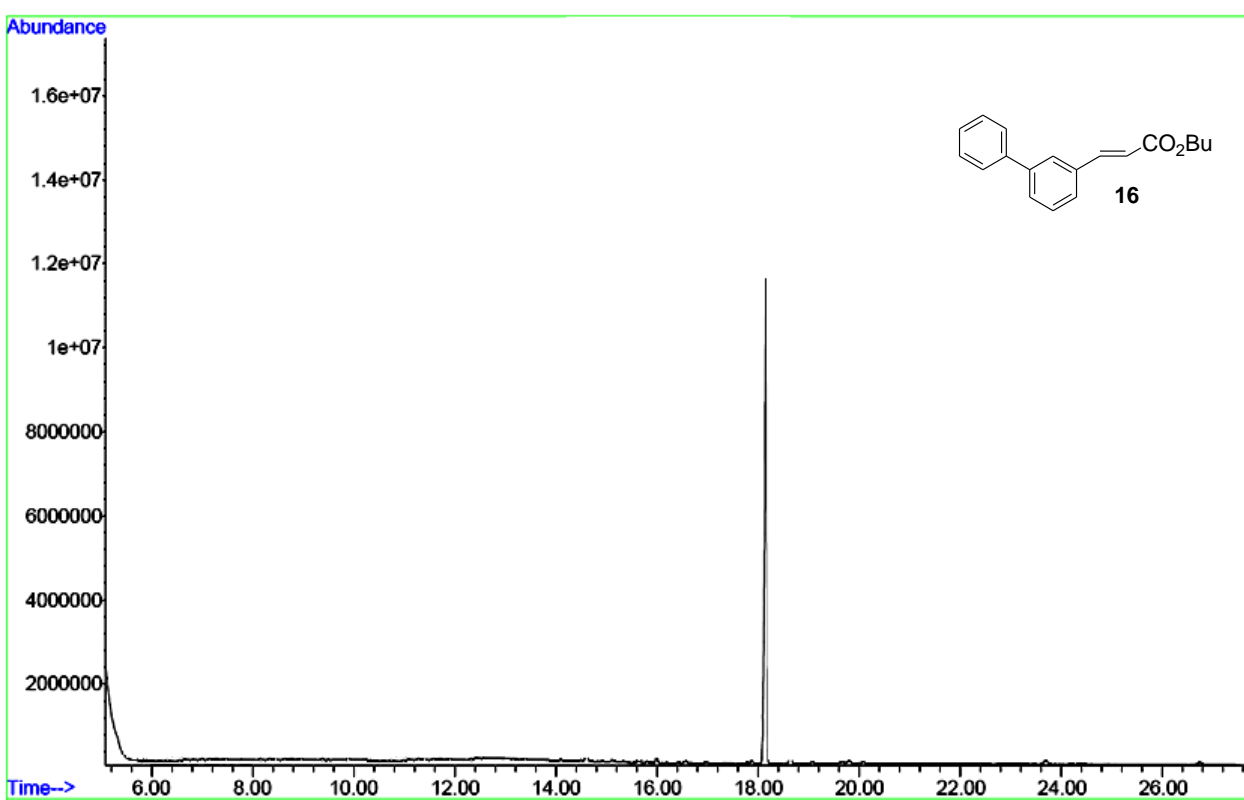

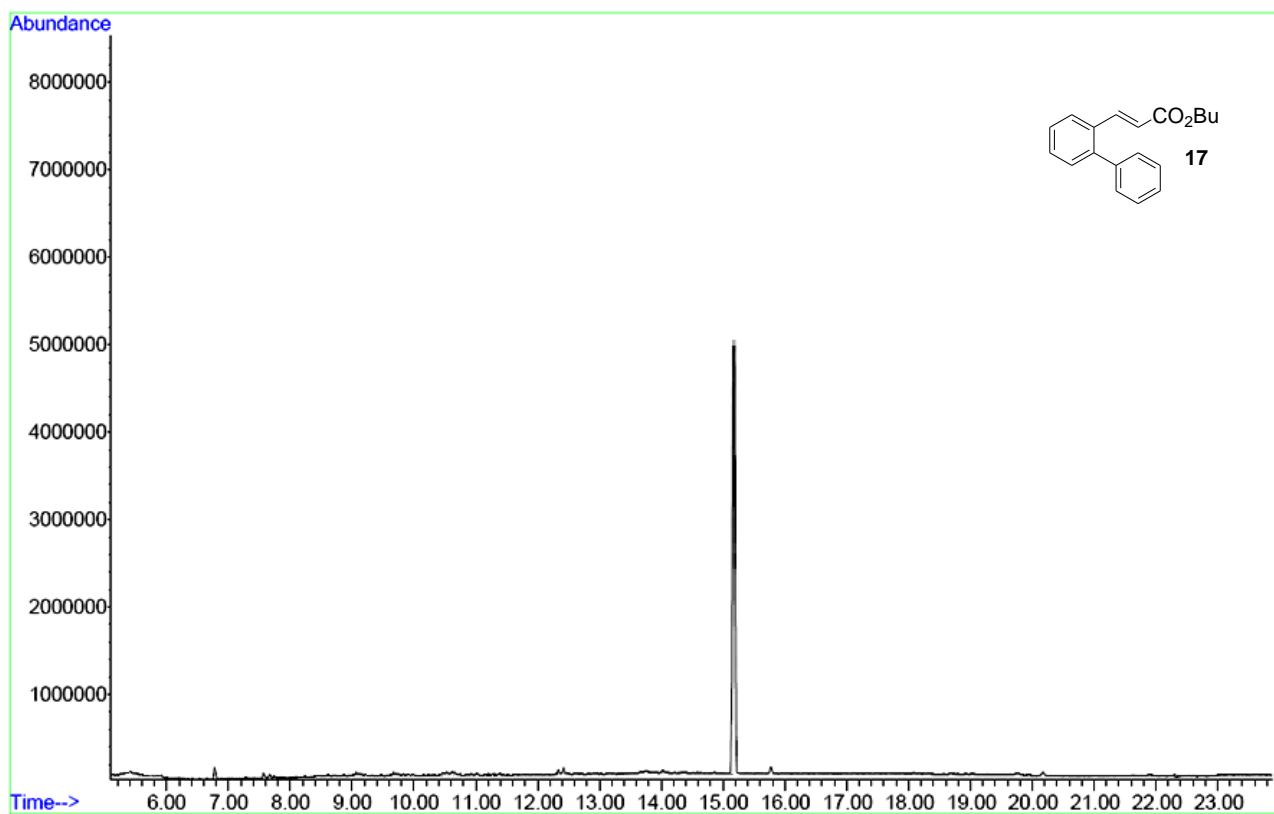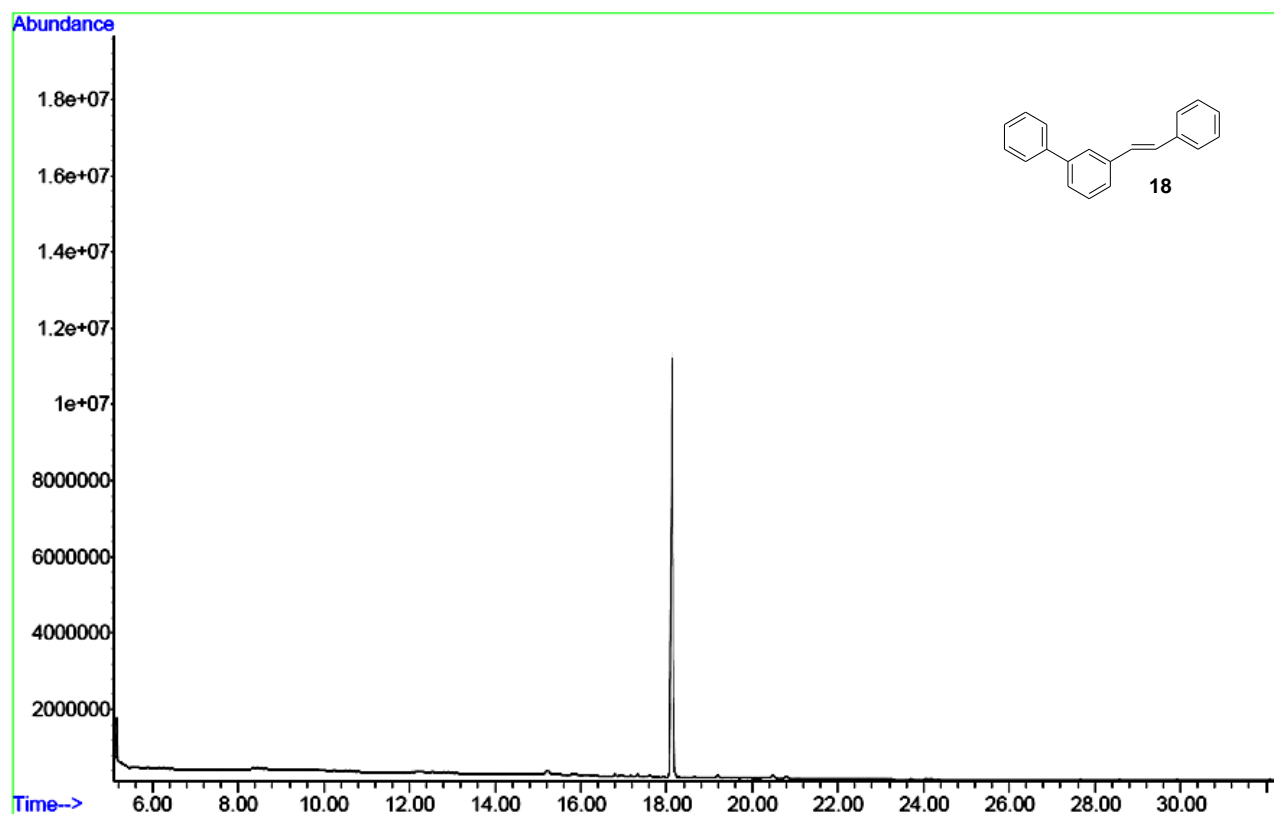

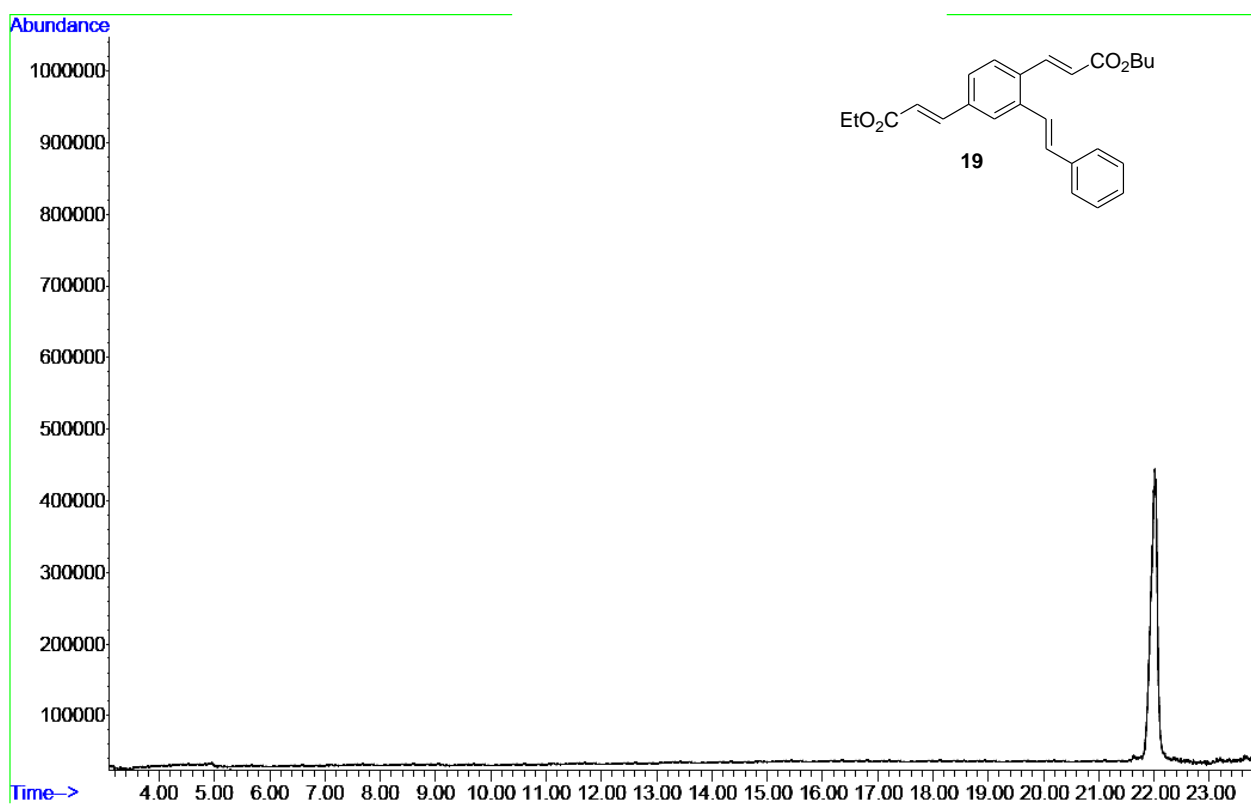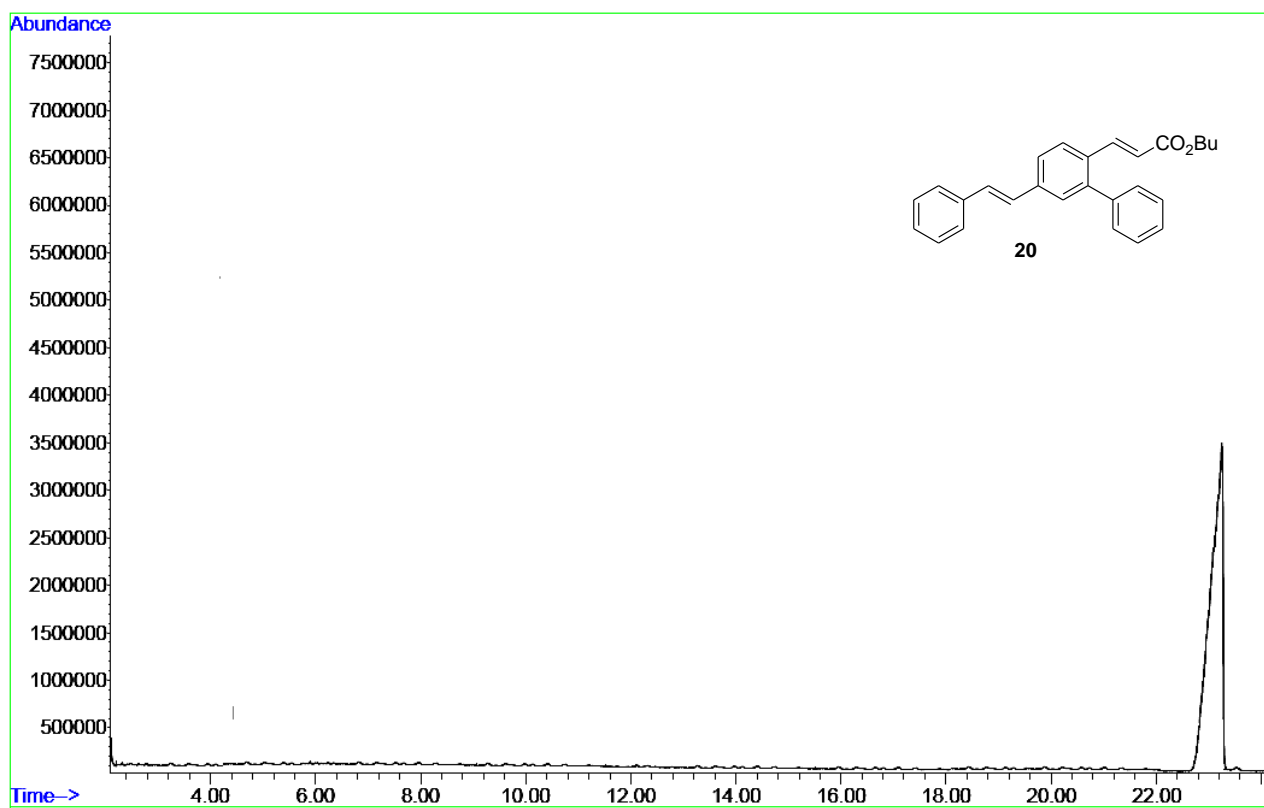

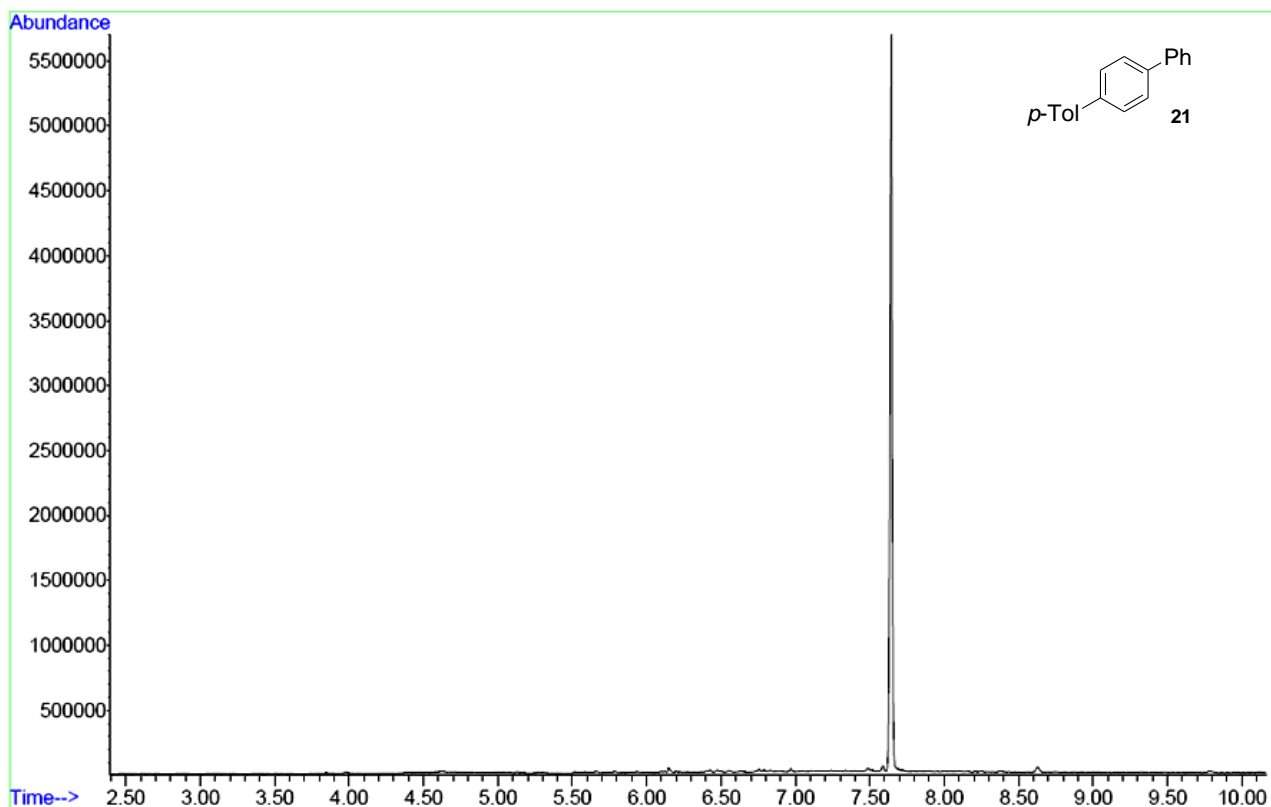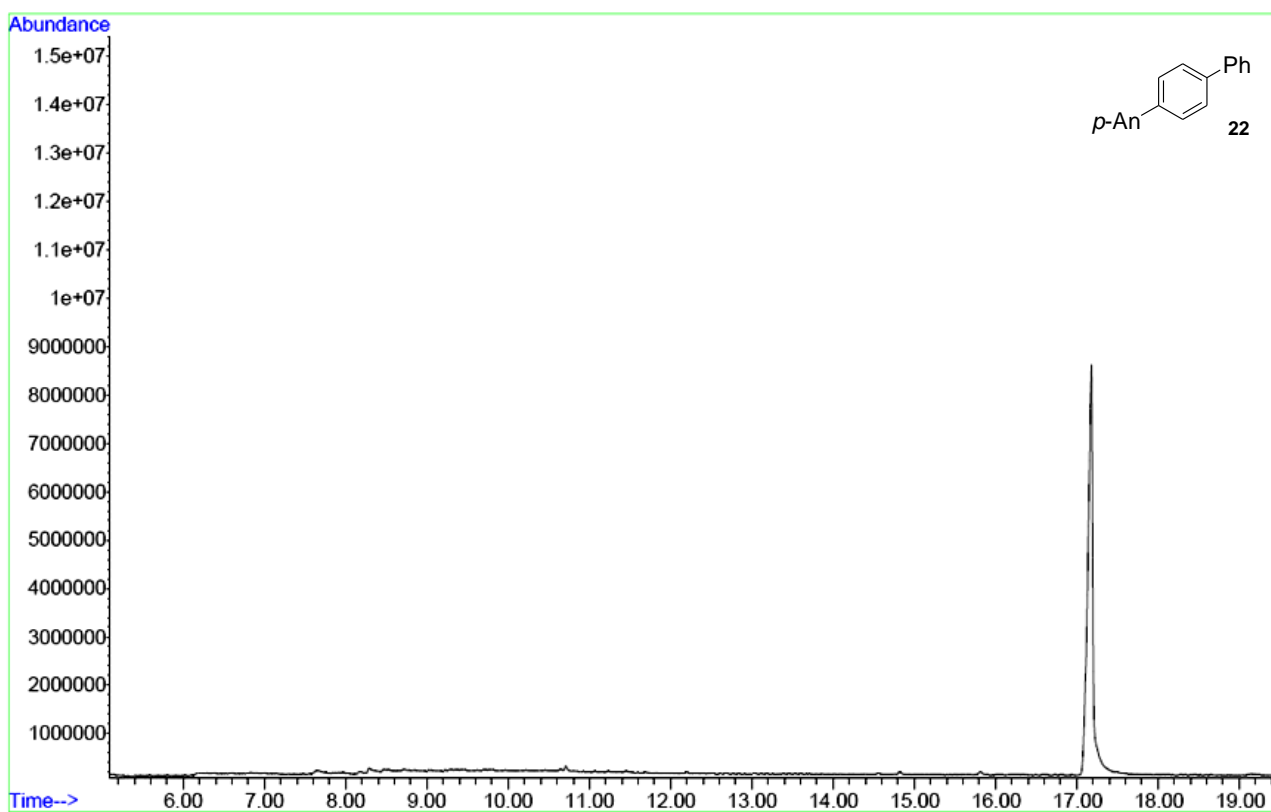

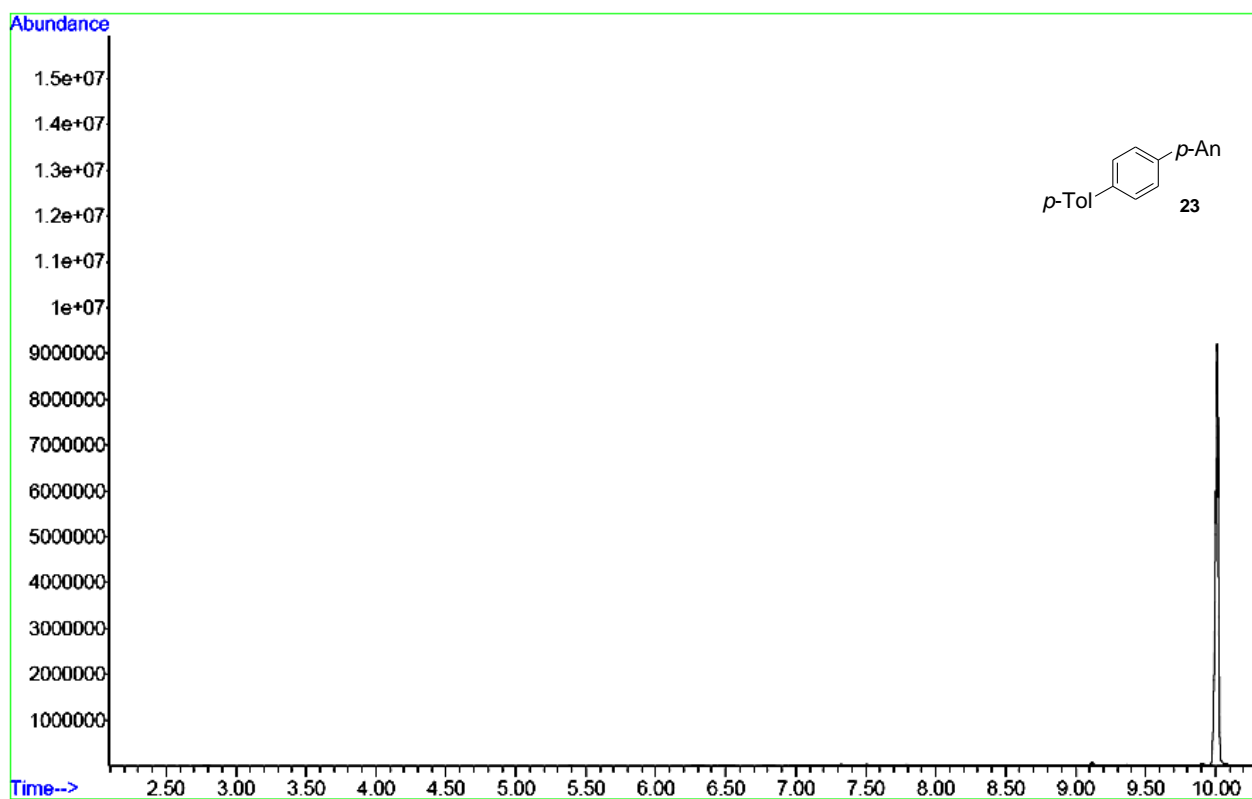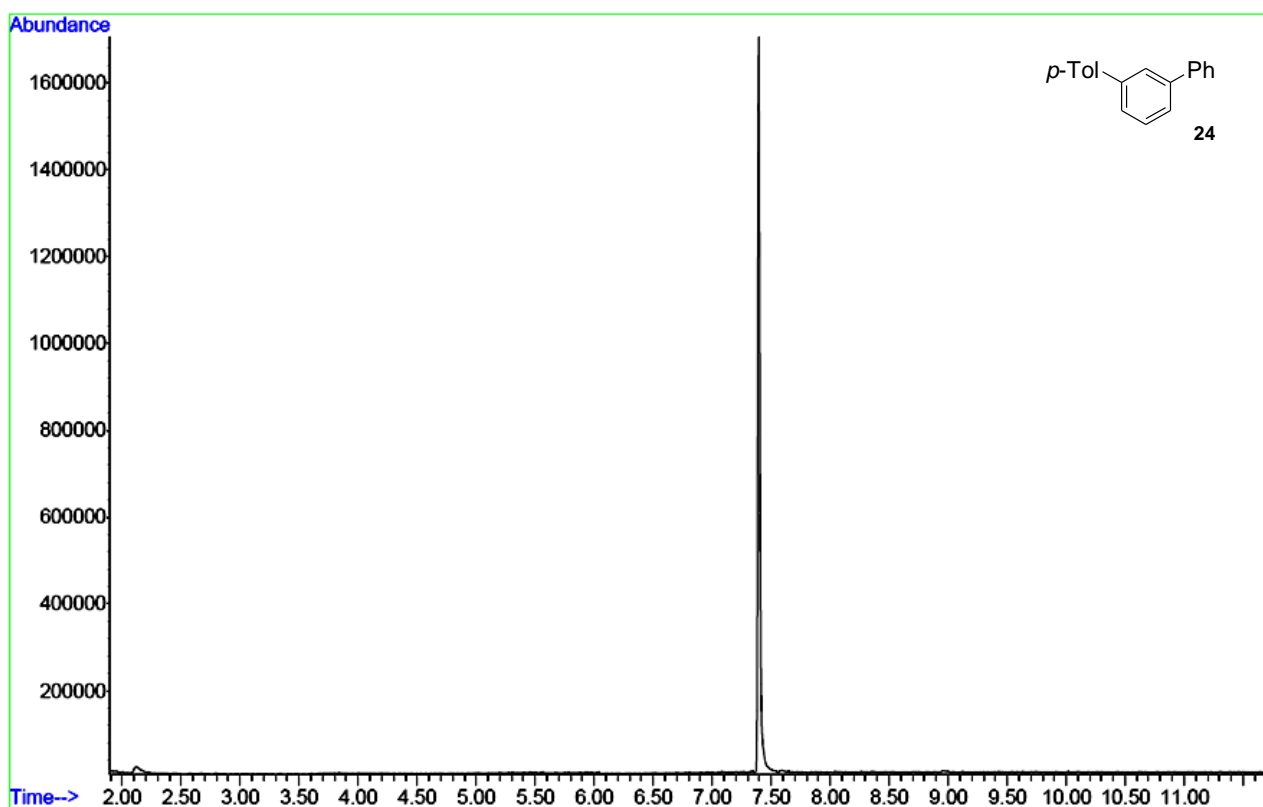

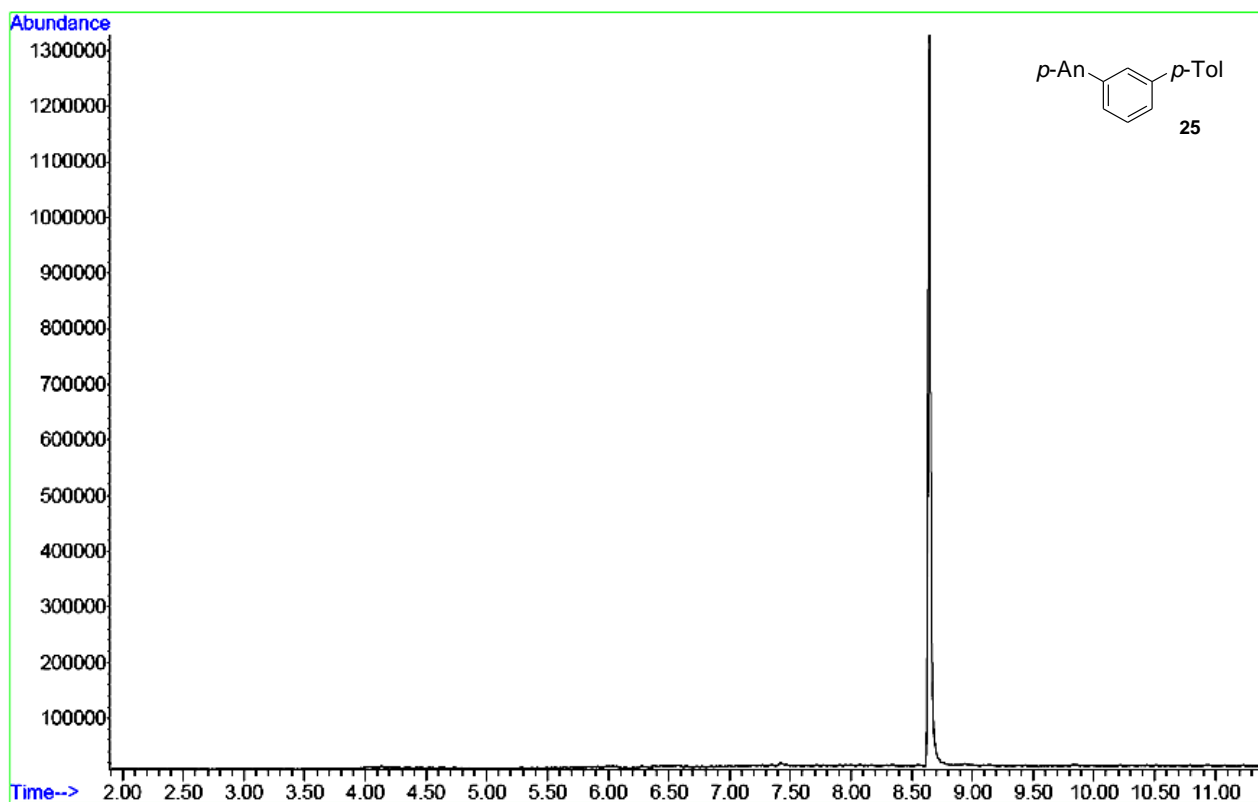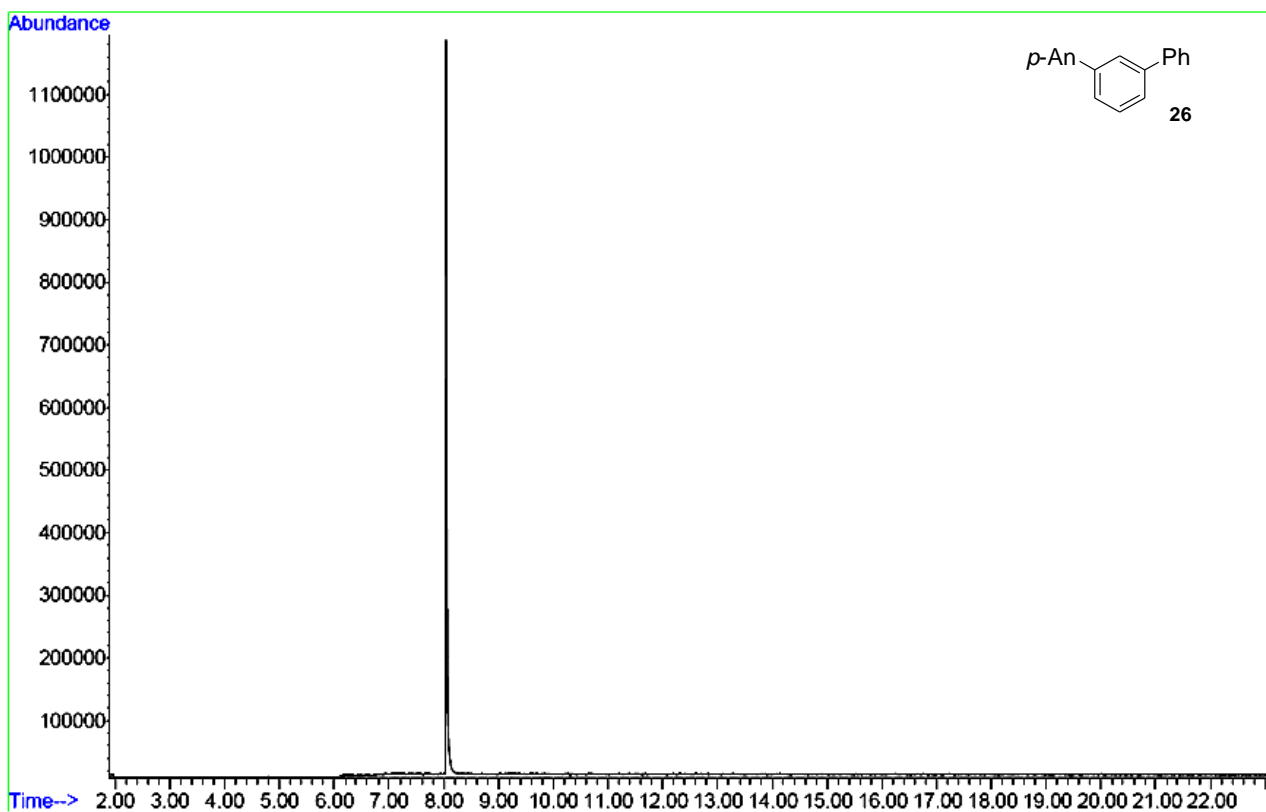



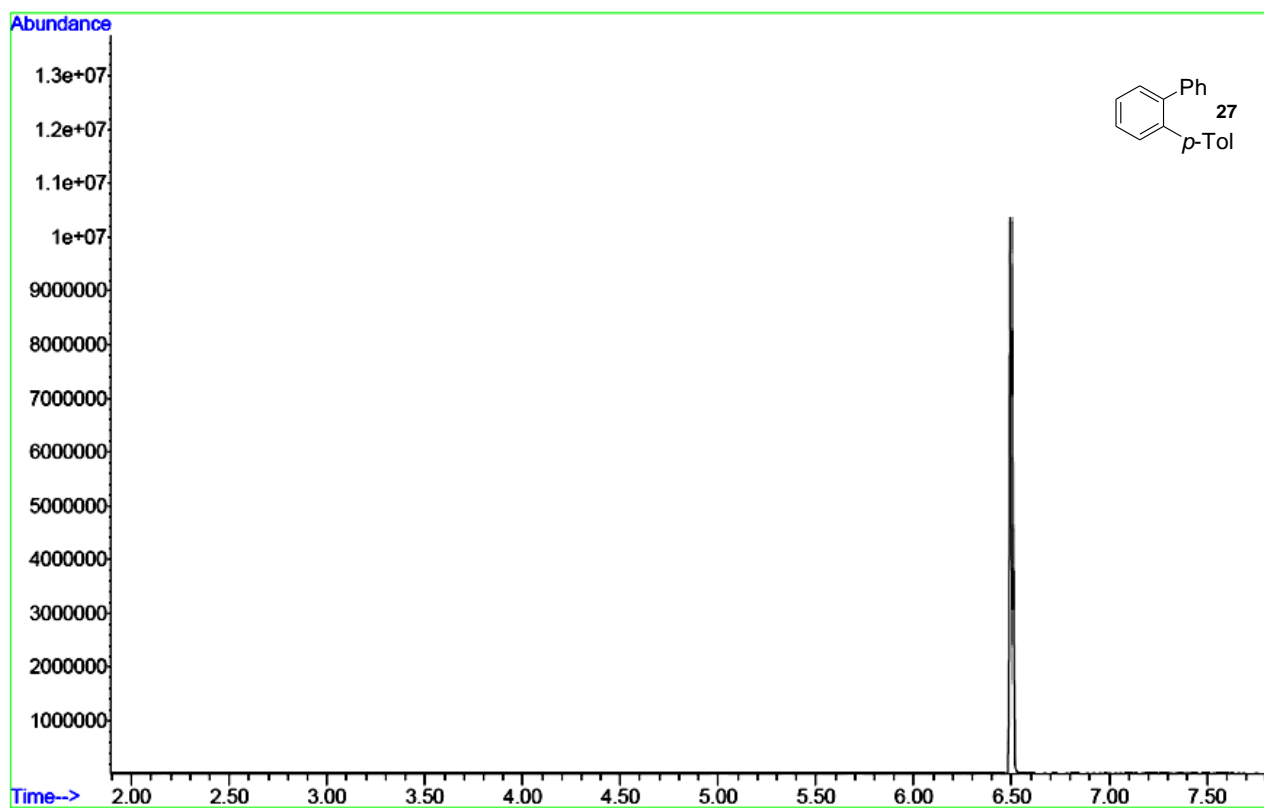

Supplement: c1ob06385e.pdf [file c1ob06385e.pdf]
